# Supplementary material for: Addition of daratumumab to multiple myeloma backbone regimens significantly improves clinical outcomes: a systematic review and meta-analysis of randomised controlled trials
Source: PubMed Central journal article supplement (PMC8578422; doi:10.1038/s41598-021-01440-x), 2021-11-09

# Appendix A

Summary: This document contains exclusion reasons for records of full-text assessment and additional forest plots not included in the main text. These forest plots are followed by the corresponding risk of bias assessment.

## **Addition of daratumumab to multiple myeloma backbone regimens: A systematic review and meta-analysis of randomised controlled trials**

**Szabolcs Kiss<sup>1</sup>, Noémi Gede<sup>2</sup>, Péter Hegyi<sup>3</sup>, Bettina Nagy<sup>2</sup>, Rita Deák<sup>2</sup>, Fanni Dembrovszky<sup>2</sup>, Stefania Bunduc<sup>4</sup>, Bálint Erőss<sup>2</sup>, Tamás Leiner<sup>5</sup>, Zsolt Szakács<sup>6</sup> #, Hussain Alizadeh<sup>6</sup> # \***

<sup>1</sup>Doctoral School of Clinical Medicine, University of Szeged, Szeged, Hungary  
Address: H-6720 Szeged, Korányi fasor 8-10., Hungary

<sup>2</sup>Institute for Translational Medicine, Medical School, University of Pécs, Pécs, Hungary  
Address: H-7624 Pécs, Szigeti út 12. 2nd floor, Hungary

<sup>3</sup>Centre for Translational Medicine, Semmelweis University, Budapest, Hungary  
Address: H-1085 Budapest, Üllői út 26., Hungary

<sup>4</sup>Doctoral school, Carol Davila University of Medicine and Pharmacy, Bucharest, Romania  
Address: RO-050474 Bulevardul Eroii Sanitari 8, București, Romania

<sup>5</sup>North West Anglia NHS Foundation Trust, United Kingdom  
Address: Parkway Hinchingsbrooke, Huntingdon PE29 6NT, United Kingdom

<sup>6</sup>Division of Haematology, First Department of Medicine, Medical School, University of Pécs, Pécs, Hungary  
Address: H-7624 Pécs, Ifjúság útja 13., Hungary

**# equally contributed**

**\* Correspondence:**

Hussain Alizadeh M.D., Ph.D., Address: Division of Haematology, First Department of Medicine, Medical School, University of Pécs, H-7624 Pécs, Ifjúság Street 13., Hungary;  
Tel: +36306436099  
E-mail: alizadeh.hussain@pte.hu

**Supplementary Table 1: Reasons of exclusion for individual studies in the full text assessment**

|                        | <b>Study</b>                                                                                                                                                                                                                                                                                             | <b>Reason for exclusion</b> |
|------------------------|----------------------------------------------------------------------------------------------------------------------------------------------------------------------------------------------------------------------------------------------------------------------------------------------------------|-----------------------------|
| Zweegman et al. 2019   | Bortezomib, lenalidomide, and dexamethasone (VRd) ± daratumumab (DARA) in patients (pts) with newly diagnosed multiple myeloma (NDMM) for whom transplant is not planned as initial therapy: a multicenter, randomized, phase III study (CEPHEUS)                                                        | Conference abstract         |
| Weisel et al. 2020     | Health-related quality of life outcomes from the phase 3 candor study in patients with relapsed or refractory multiple myeloma                                                                                                                                                                           | Conference abstract         |
| Weisel et al. 2018     | Carfilzomib and dexamethasone versus 8 cycles of bortezomib and dexamethasone: An indirect comparison and exploratory analysis of the efficacy and safety of the randomized, phase 3 endeavor trial                                                                                                      | Conference abstract         |
| Weisel et al. 2019     | Efficacy and safety of daratumumab, bortezomib, and dexamethasone (D-VD) versus bortezomib and dexamethasone (VD) in first relapse patients (pts) with multiple myeloma (mm): Four-year update of castor                                                                                                 | Conference abstract         |
| Weisel et al. 2017     | Efficacy of daratumumab in combination with lenalidomide plus dexamethasone (DRd) or bortezomib plus dexamethasone (DVd) in relapsed or refractory multiple myeloma (RRMM) based on cytogenetic risk status                                                                                              | Conference abstract         |
| Weisel et al. 2020     | Carfilzomib, dexamethasone (KD) and daratumumab versus KD in relapsed or refractory multiple myeloma: Subgroup analysis of the candor study by number of prior lines of therapy and prior therapies                                                                                                      | Conference abstract         |
| Weisel et al. 2016     | Phase 3 randomised study of daratumumab, bortezomib and dexamethasone (DVd) vs bortezomib and dexamethasone (Vd) in patients (pts) with relapsed or refractory multiple myeloma (RRMM): CASTOR                                                                                                           | Conference abstract         |
| Weisel et al. 2017     | Efficacy and safety of daratumumab, bortezomib and dexamethasone (DVD) versus bortezomib and dexamethasone (VD) in relapsed or refractory multiple myeloma (RRMM): Updated analysis of castor                                                                                                            | Conference abstract         |
| Voorhees et al. 2019   | Depth of response to daratumumab (DARA), lenalidomide, bortezomib, and dexamethasone (RVd) improves over time in patients (pts) with transplant-eligible newly diagnosed multiple myeloma (NDMM): Griffin study update                                                                                   | Conference abstract         |
| Voorhees et al. 2017   | Interim safety analysis of a phase 2 randomized study of daratumumab (Dara), Lenalidomide (R), Bortezomib (V), and Dexamethasone (d; Dara-Rvd) Vs. Rvd in patients (Pts) with newly diagnosed multiple myeloma (MM) eligible for high-dose therapy (HDT) and autologous stem cell transplantation (ASCT) | Conference abstract         |
| Van Sanden et al. 2018 | ADJUSTMENT FOR THE IMPACT OF SUBSEQUENT THERAPIES NOT AVAILABLE IN UK ON OVERALL SURVIVAL (OS) IN CASTOR TRIAL: A SUBGROUP ANALYSIS IN SECOND-LINE (2L) PATIENTS                                                                                                                                         | Conference abstract         |
| Usmani et al. 2019     | Carfilzomib, dexamethasone, and daratumumab versus carfilzomib and dexamethasone for the treatment of patients with relapsed or refractory multiple myeloma (RRMM): Primary analysis results from the randomized, open-label, phase 3 study candor (NCT03158688)                                         | Conference abstract         |

**Supplementary Table 1:** Reasons of exclusion for individual studies in the full text assessment (continued)

|                        | <b>Study</b>                                                                                                                                                                                                                                                                                           | <b>Reason for exclusion</b> |
|------------------------|--------------------------------------------------------------------------------------------------------------------------------------------------------------------------------------------------------------------------------------------------------------------------------------------------------|-----------------------------|
| Usmani et al. 2019     | Impact of age on efficacy and safety of daratumumab in combination with lenalidomide and dexamethasone (D-Rd) in patients (pts) with transplant-ineligible newly diagnosed multiple myeloma (NDMM): MAIA                                                                                               | Conference abstract         |
| Usmani et al. 2016     | Efficacy of daratumumab, lenalidomide, and dexamethasone versus lenalidomide and dexamethasone in relapsed or refractory multiple myeloma patients with 1 to 3 prior lines of therapy: Updated analysis of pollux                                                                                      | Conference abstract         |
| Thein et al. 2019      | Efficacy of upfront daratumumab combination regimen in patients with newly diagnosed multiple myeloma                                                                                                                                                                                                  | Conference abstract         |
| Spencer et al. 2017    | Daratumumab, bortezomib, and dexamethasone (DVD) versus bortezomib and dexamethasone (VD) in relapsed or refractory multiple myeloma (RRMM): Updated efficacy and safety analysis of castor                                                                                                            | Conference abstract         |
| Sonneveld et al. 2019  | Bortezomib, lenalidomide, and dexamethasone (VRd) ± daratumumab (DARA) in patients (pts) with transplant-eligible (TE) newly diagnosed multiple myeloma (NDMM): A multicenter, randomized, phase III study (PERSEUS)                                                                                   | Conference abstract         |
| Sonneveld et al. 2019  | Daratumumab Plus Bortezomib, Thalidomide, and Dexamethasone (D-VTd) in Transplant-eligible Newly Diagnosed Multiple Myeloma (NDMM): Subgroup Analysis of High-risk Patients (Pts) in CASSIOPEIA                                                                                                        | Conference abstract         |
| Shah et al. 2016       | An open-label, randomised, phase 3 study of daratumumab, lenalidomide, and dexamethasone (DRd) versus lenalidomide and dexamethasone (Rd) in relapsed or refractory multiple myeloma (RRMM): POLLUX                                                                                                    | Conference abstract         |
| Shah et al. 2019       | Daratumumab (DARA) plus lenalidomide versus lenalidomide alone as maintenance treatment in patients with newly diagnosed multiple myeloma (NDMM) after frontline autologous stem cell transplant (ASCT): Use of minimal residual disease (MRD) as a novel primary endpoint in the phase 3 auriga study | Conference abstract         |
| Sebag et al. 2019      | Lenalidomide plus bortezomib and dexamethasone in the treatment of newly diagnosed multiple myeloma: Results from a Canadian cost-effectiveness analysis                                                                                                                                               | Conference abstract         |
| San-Miguel et al. 2017 | Efficacy by cytogenetic risk status for daratumumab in combination with lenalidomide and dexamethasone or bortezomib and dexamethasone in relapsed or refractory multiple myeloma                                                                                                                      | Conference abstract         |
| San-Miguel et al. 2018 | Daratumumab plus bortezomib-melphalan-prednisone (VMP) in elderly (≥75 years of age) patients with newly diagnosed multiple myeloma ineligible for transplantation (alcyone)                                                                                                                           | Conference abstract         |

**Supplementary Table 1:** Reasons of exclusion for individual studies in the full text assessment (continued)

|                     | <b>Study</b>                                                                                                                                                                                                                                                       | <b>Reason for exclusion</b> |
|---------------------|--------------------------------------------------------------------------------------------------------------------------------------------------------------------------------------------------------------------------------------------------------------------|-----------------------------|
| Potluri et al. 2019 | PCN254 AN INDIRECT COMPARISON OF ELOTUZUMAB, CARFILZOMIB, AND DARATUMUMAB WHEN GIVEN IN COMBINATION WITH POMALIDOMIDE AND DEXAMETHASONE FOR RELAPSED/REFRACTORY MULTIPLE MYELOMA                                                                                   | Conference abstract         |
| Palumbo et al. 2016 | Phase III randomized controlled study of daratumumab, bortezomib, and dexamethasone (DVd) versus bortezomib and dexamethasone (Vd) in patients (pts) with relapsed or refractory multiple myeloma (RRMM): CASTOR study                                             | Conference abstract         |
| Palumbo et al. 2016 | Phase 3 randomised controlled study of daratumumab, bortezomib and dexamethasone versus bortezomib and dexamethasone in patients with relapsed or refractory multiple myeloma: Castor                                                                              | Conference abstract         |
| Moreau et al. 2017  | Daratumumab, lenalidomide, and dexamethasone (DRD) versus lenalidomide and dexamethasone (RD) in relapsed or refractory multiple myeloma (RRMM) based on prior treatment history, renal function, and cytogenetic risk: Subgroup analyses of pollux                | Conference abstract         |
| Moreau et al. 2016  | Efficacy of daratumumab, lenalidomide and dexamethasone versus lenalidomide and dexamethasone alone for relapsed or refractory multiple myeloma among patients with 1 to 3 prior lines of therapy based on previous treatment exposure: Updated analysis of pollux | Conference abstract         |
| Moreau et al. 2019  | Comparative efficacy and safety of bortezomib, thalidomide, and dexamethasone (VTD) without and with daratumumab (D-VTD) from cassiopeia versus VTD from PETHEMA/GEM in patients with newly diagnosed multiple myeloma using propensity score matching (PSM)       | Conference abstract         |
| Moreau et al. 2019  | Phase 3 randomized study of daratumumab (DARA) + bortezomib/thalidomide/dexamethasone (D-VTd) vs VTd in transplant-eligible (TE) newly diagnosed multiple myeloma (NDMM): CASSIOPEIA Part 1 results                                                                | Conference abstract         |
| Moreau et al. 2019  | A Matching-adjusted Indirect Comparison (MAIC) of Bortezomib-Thalidomide-Dexamethasone (VTd) and Daratumumab Plus VTd (D-VTd) Versus Bortezomib-Dexamethasone (Vd) in Patients with Newly Diagnosed Multiple Myeloma (NDMM) who are Transplant Eligible (TE)       | Conference abstract         |
| Mateos et al. 2016  | Efficacy of daratumumab, bortezomib, and dexamethasone versus bortezomib and dexamethasone in relapsed or refractory myeloma based on prior lines of therapy: Updated analysis of castor                                                                           | Conference abstract         |
| Mateos et al. 2017  | Phase 3 randomized study of daratumumab plus bortezomib, melphalan, and prednisone (D-VMP) versus bortezomib, melphalan, and prednisone (VMP) in newly diagnosed multiple myeloma (NDMM) patients (Pts) ineligible for transplant (ALCYONE)                        | Conference abstract         |
| Mateos et al. 2015  | A randomized open-label study of bortezomib, melphalan, and prednisone (VMP) versus daratumumab (DARA) plus VMP in patients with previously untreated multiple myeloma (MM) who are ineligible for high-dose therapy: 54767414MMY3007 (Alcyone)                    | Conference abstract         |

**Supplementary Table 1:** Reasons of exclusion for individual studies in the full text assessment (continued)

|                      | <b>Study</b>                                                                                                                                                                                                                                         | <b>Reason for exclusion</b> |
|----------------------|------------------------------------------------------------------------------------------------------------------------------------------------------------------------------------------------------------------------------------------------------|-----------------------------|
| Maiese et al. 2018   | Cost per median month of progression-free survival for daratumumab plus bortezomib and dexamethasone compared with carfilzomib plus dexamethasone in relapsed/refractory multiple myeloma                                                            | Conference abstract         |
| Lin et al. 2019      | Daratumumab Plus Lenalidomide Versus Lenalidomide Alone as Maintenance Treatment in Patients With Newly Diagnosed Multiple Myeloma After Frontline Transplant: A Multicenter, Randomized, Phase 3 Study (AURIGA)                                     | Conference abstract         |
| Lentzsch et al. 2017 | Daratumumab, bortezomib, and dexamethasone versus bortezomib and dexamethasone for relapsed/refractory multiple myeloma (RRMM) patients: An update of overall survival in castor                                                                     | Conference abstract         |
| Landgren et al. 2019 | Weekly carfilzomib, lenalidomide, dexamethasone and daratumumab (wKRd-D) combination therapy provides unprecedented MRD negativity rates in newly diagnosed multiple myeloma: A clinical and correlative phase 2 study                               | Conference abstract         |
| Kaufman et al. 2019  | Four-year follow-up of the phase 3 pollux study of daratumumab plus lenalidomide and dexamethasone (D-RD) versus lenalidomide and dexamethasone (RD) alone in relapsed or refractory multiple myeloma (RRMM)                                         | Conference abstract         |
| Jenner et al. 2020   | Tailoring treatment for patients with newly diagnosed high-risk myeloma - Feasibility results of the UKMRA OPTIMUM (MUKnine) trial                                                                                                                   | Conference abstract         |
| Hungria et al. 2019  | Comparison of daratumumab plus bortezomib, melphalan, and prednisone (D-VMP) with standard of care for patients from latin america with newly diagnosed multiple myeloma (NDMM) who were transplant ineligible: A propensity score matching analysis | Conference abstract         |
| Hulin et al. 2019    | Stem cell (SC) yield and transplantation results from transplant-eligible newly diagnosed multiple myeloma (TE NDMM) patients (pts) receiving daratumumab (DARA) + bortezomib/thalidomide/dexamethasone (D-VTd) in the phase 3 CASSIOPEIA study      | Conference abstract         |
| Huang et al. 2020    | Phase 3 study of daratumumab/bortezomib/ dexamethasone (D-Vd) versus bortezomib/ dexamethasone (VD) in chinese patients (pts) with relapsed/refractory multiple myeloma (RRMM): MMY3009 (LEPUS)                                                      | Conference abstract         |
| Htut et al. 2020     | Efficacy of daratumumab combination regimen in patients with multiple myeloma: A combined analysis of six phase III randomised controlled trials                                                                                                     | Conference abstract         |
| Htut et al. 2019     | Incidence of second primary malignancies and peripheral sensory neuropathy in patients with multiple myeloma receiving daratumumab containing regimen                                                                                                | Conference abstract         |

**Supplementary Table 1:** Reasons of exclusion for individual studies in the full text assessment (continued)

|                         | <b>Study</b>                                                                                                                                                                                                                                                                                                 | <b>Reason for exclusion</b> |
|-------------------------|--------------------------------------------------------------------------------------------------------------------------------------------------------------------------------------------------------------------------------------------------------------------------------------------------------------|-----------------------------|
| Giri et al. 2020        | Impact of daratumumab in the treatment of multiple myeloma according to cytogenetic risk                                                                                                                                                                                                                     | Conference abstract         |
| Gajra et al. 2019       | Perceptions of community hematologists/oncologists on the potential of data presented at ASH 2018 and ASCO 2019 to alter the standard of care for multiple myeloma treatment                                                                                                                                 | Conference abstract         |
| Facon et al. 2018       | Phase 3 randomized study of daratumumab plus lenalidomide and dexamethasone (D-Rd) versus lenalidomide and dexamethasone (Rd) in patients with newly diagnosed multiple myeloma (NDMM) ineligible for transplant (MAIA)                                                                                      | Conference abstract         |
| Facon et al. 2015       | Two randomized open-label studies of daratumumab (DARA) plus standard of care treatment versus standard of care alone in patients with previously untreated multiple myeloma (MM) ineligible for high-dose therapy: 54767414MMY3007 (Alcyone) and 54767414MMY3008 (Maia)                                     | Conference abstract         |
| Einsele et al. 2020     | The B cell maturation antigen (BCMA) chimeric antigen receptor (CAR) T cell therapy idecabtagene vicleucel (IDE-CEL; bb2121) in relapsed and refractory multiple myeloma (RRMM): Outcomes from a phase 1 study support the phase 3 Karmma-3 study design to compare IDE-CEL versus standard triplet regimens | Conference abstract         |
| Dimopoulos et al. 2017  | Daratumumab, lenalidomide, and dexamethasone (DRD) versus lenalidomide and dexamethasone (RD) in relapsed or refractory multiple myeloma (RRMM): Updated efficacy and safety analysis of pollux                                                                                                              | Conference abstract         |
| Dimopoulos et al. 2017  | Efficacy and safety of daratumumab, lenalidomide, and dexamethasone versus Rd alone in relapsed or refractory multiple myeloma: Updated analysis of pollux                                                                                                                                                   | Conference abstract         |
| Cook et al. 2020        | Four-year follow-up of the phase 3 POLLUX study of daratumumab plus lenalidomide and dexamethasone versus lenalidomide and dexamethasone alone in relapsed or refractory multiple myeloma                                                                                                                    | Conference abstract         |
| Chiu et al. 2016        | Daratumumab in combination with lenalidomide plus dexamethasone induces clonality increase and T-cell expansion: Results from a phase 3 randomized study (POLLUX)                                                                                                                                            | Conference abstract         |
| Charie et al. 2019      | Daratumumab plus lenalidomide, bortezomib, and dexamethasone (d-RVd) Improves Depth Of Response In Transplant-Eligible Newly Diagnosed Multiple Myeloma: GRIFFIN primary analysis                                                                                                                            | Conference abstract         |
| Chanan-Khan et al. 2016 | Daratumumab, bortezomib and dexamethasone versus bortezomib and dexamethasone alone for relapsed or refractory multiple myeloma based on prior treatment exposure: Updated efficacy analysis of castor                                                                                                       | Conference abstract         |

**Supplementary Table 1:** Reasons of exclusion for individual studies in the full text assessment (continued)

|                          | <b>Study</b>                                                                                                                                                                                                                                              | <b>Reason for exclusion</b> |
|--------------------------|-----------------------------------------------------------------------------------------------------------------------------------------------------------------------------------------------------------------------------------------------------------|-----------------------------|
| Cavo et al. 2018         | Daratumumab plus Bortezomib-Melphalan-Prednisone (VMP) in elderly ( $\geq 75$ y) patients (Pts) with newly diagnosed multiple myeloma (NDMM) ineligible for transplantation (ALCYONE)                                                                     | Conference abstract         |
| Cavo et al. 2018         | Impact of baseline renal function on efficacy and safety of daratumumab plus bortezomibmelphalan- prednisone (VMP) in patients (Pts) with newly diagnosed multiple myeloma (NDMM) ineligible for transplantation (ALCYONE)                                | Conference abstract         |
| Cavo et al. 2018         | Impact of baseline renal function on efficacy and safety of daratumumab plus bortezomib-melphalan-prednisone (VMP) in patients (Pts) with newly diagnosed multiple myeloma (NDMM) ineligible for transplantation (ALCYONE)                                | Conference abstract         |
| Cavo et al. 2018         | Daratumumab plus Bortezomib-Melphalan-Prednisone (VMP) in elderly ( $\geq 75$ y) patients (Pts) with newly diagnosed multiple myeloma (NDMM) ineligible for transplantation (ALCYONE)                                                                     | Conference abstract         |
| Bahlis et al. 2017       | Daratumumab, lenalidomide, and dexamethasone (DRd) vs lenalidomide and dexamethasone (Rd) in relapsed or refractory multiple myeloma (RRMM): Efficacy and safety update (POLLUX)                                                                          | Conference abstract         |
| Bahlis et al. 2019       | Randomized phase 2 study of subcutaneous daratumumab plus carfilzomib/dexamethasone versus carfilzomib/dexamethasone alone in patients with multiple myeloma who have been previously treated with intravenous daratumumab to evaluate retreatment (LYNX) | Conference abstract         |
| Bahlis et al. 2019       | Daratumumab plus lenalidomide and dexamethasone (D-RD) versus lenalidomide and dexamethasone (RD) in patients with newly diagnosed multiple myeloma (NDMM) ineligible for transplant: Updated analysis of maia                                            | Conference abstract         |
| Avet-Loiseau et al. 2019 | Efficacy of daratumumab (DARA) + bortezomib/thalidomide/dexamethasone (D-VTd) in transplant-eligible newly diagnosed multiple myeloma (TE NDMM) based on minimal residual disease (MRD) status: Analysis of the CASSIOPEIA trial                          | Conference abstract         |
| Avet-Loiseau et al. 2016 | Evaluation of minimal residual disease (MRD) in relapsed/refractory multiple myeloma (RRMM) patients treated with daratumumab in combination with lenalidomide plus dexamethasone or bortezomib plus dexamethasone                                        | Conference abstract         |
| Avet-Loiseau et al. 2019 | Concordance of Post-consolidation Minimal Residual Disease Rates by Multiparametric Flow Cytometry and Next-generation Sequencing in CASSIOPEIA                                                                                                           | Conference abstract         |
| Anderson et al. 2020     | A matching-adjusted indirect comparison (MAIC) of progression-free survival between elotuzumab, daratumumab, and panobinostat triplet regimens for relapsed/refractory multiple myeloma                                                                   | Conference abstract         |

**Supplementary Table 1:** Reasons of exclusion for individual studies in the full text assessment (continued)

|                        | <b>Study</b>                                                                                                                                                                                                                                                                                                                                                   | <b>Reason for exclusion</b> |
|------------------------|----------------------------------------------------------------------------------------------------------------------------------------------------------------------------------------------------------------------------------------------------------------------------------------------------------------------------------------------------------------|-----------------------------|
| Al Hadidi et al. 2019  | Safety Analysis of Five Randomized Controlled Studies of Daratumumab in Patients with Multiple Myeloma                                                                                                                                                                                                                                                         | Conference abstract         |
| Comenzo et al. 2020    | Reduction in absolute involved free light chain and difference between involved and uninvolved free light chain is associated with prolonged major organ deterioration progression-free survival in patients with newly diagnosed al amyloidosis receiving bortezomib, cyclophosphamide, and dexamethasone with or without daratumumab: results from andromeda | Conference abstract         |
| Cook et al. 2021       | Four-year follow-up of the phase 3 POLLUX study of daratumumab plus lenalidomide and dexamethasone versus lenalidomide and dexamethasone alone in relapsed or refractory multiple myeloma                                                                                                                                                                      | Conference abstract         |
| Dimopoulos et al. 2020 | Carfilzomib, dexamethasone, and daratumumab versus carfilzomib and dexamethasone in relapsed or refractory multiple myeloma: updated efficacy and safety results of the phase 3 candor study                                                                                                                                                                   | Conference abstract         |
| Dimopoulos et al. 2020 | Apollo: phase 3 randomized study of subcutaneous daratumumab plus pomalidomide and dexamethasone (D-PD) versus pomalidomide and dexamethasone (PD) alone in patients (PTS) with relapsed/refractory multiple myeloma (RRMM)                                                                                                                                    | Conference abstract         |
| Htut et al. 2019       | Incidence of Second Primary Malignancies and Peripheral Sensory Neuropathy in Patients with Multiple Myeloma Receiving Daratumumab Containing Regimen                                                                                                                                                                                                          | Conference abstract         |
| Htut et al. 2019       | Daratumumab-Related Hematological Toxicities in Patients with Multiple Myeloma: A Combined Analysis of Five Phase III Randomized Controlled Trials                                                                                                                                                                                                             | Conference abstract         |
| Huang et al. 2020      | Phase 3 study of daratumumab/bortezomib/ dexamethasone (D-Vd) versus bortezomib/ dexamethasone (VD) in chinese patients (pts) with relapsed/refractory multiple myeloma (RRMM): MMY3009 (LEPUS)                                                                                                                                                                | Conference abstract         |
| Kaufman et al. 2019    | Four-Year Follow-up of the Phase 3 Pollux Study of Daratumumab Plus Lenalidomide and Dexamethasone (D-Rd) Versus Lenalidomide and Dexamethasone (Rd) Alone in Relapsed or Refractory Multiple Myeloma (RRMM)                                                                                                                                                   | Conference abstract         |
| Kumar et al. 2020      | Updated analysis of daratumumab plus lenalidomide and dexamethasone (D-RD) versus lenalidomide and dexamethasone(RD) in patients with transplant-ineligible newly diagnosed multiple myeloma (NDMM): the phase 3 MAIA study                                                                                                                                    | Conference abstract         |



**Supplementary Table 1:** Reasons of exclusion for individual studies in the full text assessment (continued)

|                      | <b>Study</b>                                                                                                                                                                                                                                                                                           | <b>Reason for exclusion</b> |
|----------------------|--------------------------------------------------------------------------------------------------------------------------------------------------------------------------------------------------------------------------------------------------------------------------------------------------------|-----------------------------|
| Landgren et al. 2020 | Evaluation of minimal residual disease (MRD) negativity in patients with relapsed or refractory multiple myeloma treated in the candor study                                                                                                                                                           | Conference abstract         |
| Lu et al. 2020       | Daratumumab, bortezomib, dexamethasone (D-VD) versus bortezomib and dexamethasone (vd) in relapsed or refractory (RR) multiple myeloma (MM): Pooled subgroup analysis of lepus and castor                                                                                                              | Conference abstract         |
| Quach et al. 2020    | MM-128: carfilzomib, Dexamethasone, and Daratumumab (KdD) Versus Carfilzomib and Dexamethasone (Kd) in Relapsed or Refractory Multiple Myeloma (RRMM): subgroup Analysis of the Phase 3 CANDOR Study by Number of Prior Lines of Therapy (pLOTs) and Prior Therapies                                   | Conference abstract         |
| Shah et al. 2019     | Daratumumab (DARA) Plus Lenalidomide Versus Lenalidomide Alone As Maintenance Treatment in Patients with Newly Diagnosed Multiple Myeloma (NDMM) after Frontline Autologous Stem Cell Transplant (ASCT): use of Minimal Residual Disease (MRD) As a Novel Primary Endpoint in the Phase 3 Auriga Study | Conference abstract         |
| Voorhees et al. 2020 | Depth of response to daratumumab, lenalidomide, bortezomib, and dexamethasone improves over time in patients with transplant-eligible newly diagnosed multiple myeloma: griffin study update (published in Blood)                                                                                      | Conference abstract         |
| Voorhees et al. 2020 | Depth of Response to Daratumumab (DARA), Lenalidomide, Bortezomib, and Dexamethasone (RVd) Improves over Time in Patients (pts) with Transplant-Eligible Newly Diagnosed Multiple Myeloma (NDMM): griffin Study Update (published in Blood marrow transplantation)                                     | Conference abstract         |
| Weisel et al. 2020   | Carfilzomib, dexamethasone, and daratumumab versus carfilzomib and dexamethasone in relapsed or refractory multiple myeloma: subgroup analysis of the phase 3 candor study in patients with early or late relapse                                                                                      | Conference abstract         |
| Weisel et al. 2020   | Carfilzomib 56mg/m <sup>2</sup> twice-weekly in combination with dexamethasone and daratumumab (KDD) versus daratumumab in combination with 8 cycles of bortezomib and dexamethasone (DVD); a matching-adjusted indirect treatment comparison                                                          | Conference abstract         |
| Weisel et al. 2020   | Carfilzomib, dexamethasone (KD) and daratumumab versus KD in relapsed or refractory multiple myeloma: subgroup analysis of the candor study by number of prior lines of therapy and prior therapies                                                                                                    | Conference abstract         |
| Weisel et al. 2020   | Health-related quality of life outcomes from the phase 3 candor study in patients with relapsed or refractory multiple myeloma                                                                                                                                                                         | Conference abstract         |

**Supplementary Table 1:** Reasons of exclusion for individual studies in the full text assessment (continued)

|                       | <b>Study</b>                                                                                                                                                                                                                                                                 | <b>Reason for exclusion</b> |
|-----------------------|------------------------------------------------------------------------------------------------------------------------------------------------------------------------------------------------------------------------------------------------------------------------------|-----------------------------|
| Weisel et al. 2019    | Efficacy and Safety of Daratumumab, Bortezomib, and Dexamethasone (D-Vd) Versus Bortezomib and Dexamethasone (Vd) in First Relapse Patients (pts) with Multiple Myeloma (MM): four-Year Update of Castor                                                                     | Conference abstract         |
| Zweegman et al. 2021  | Daratumumab plus lenalidomide and dexamethasone (D-RD) versus lenalidomide and dexamethasone (rd) in transplantineligible newly diagnosed multiple myeloma (NDMM): frailty subgroup analysis of Maia                                                                         | Conference abstract         |
| Bahlis et al. 2019    | Daratumumab Plus Lenalidomide and Dexamethasone (D-Rd) Versus Lenalidomide and Dexamethasone (Rd) in Patients with Newly Diagnosed Multiple Myeloma (NDMM) Ineligible for Transplant: updated Analysis of Maia                                                               | Conference abstract         |
| Al Hadidi et al. 2019 | Safety analysis of five randomized controlled studies of daratumumab in patients with multiple myeloma                                                                                                                                                                       | Conference abstract         |
| Bahlis et al. 2019    | Randomized Phase 2 Study of Subcutaneous Daratumumab Plus Carfilzomib/Dexamethasone Versus Carfilzomib/Dexamethasone Alone in Patients with Multiple Myeloma Who Have Been Previously Treated with Intravenous Daratumumab to Evaluate Retreatment (LYNX)                    | Protocol                    |
| -                     | Efficacy of Daratumumab (dara) retreatment using a histone deacetylase-inhibitor (HDACi: panobinostat) as a dara-longevity-inducing, epigenetic agent in combination with bortezomib-dexamethasone as a quadruplet in relapsed / refractory multiple myeloma (RRMM) patients | Protocol                    |
| Euctr, S. E. 2014     | A Study Comparing Daratumumab, Lenalidomide, and Dexamethasone with Lenalidomide and Dexamethasone in Relapsed or Refractory Multiple Myeloma                                                                                                                                | Protocol                    |
| Euctr, H. U. 2015     | A Study of Combination of Daratumumanb and Velcade (Bortezomib) Melphalan-Prednisone (DVMP) Compared to Velcade Melphalan-Prednisone (VMP) in Participants with Previously Untreated Multiple Myeloma                                                                        | Protocol                    |
| Euctr, G. R. 2018     | A Study of combination of Daratumumab, VELCADE (bortezomib), Lenalidomide, and Dexamethasone (D-VRd) compared to VELCADE, Lenalidomide, and Dexamethasone (VRd) in participants with Previously Untreated Multiple Myeloma                                                   | Protocol                    |
| Euctr, F. R. 2019     | IFM 2017-03                                                                                                                                                                                                                                                                  | Protocol                    |

**Supplementary Table 1:** Reasons of exclusion for individual studies in the full text assessment (continued)

|                       | <b>Study</b>                                                                                                                                                                                                                                                                               | <b>Reason for exclusion</b> |
|-----------------------|--------------------------------------------------------------------------------------------------------------------------------------------------------------------------------------------------------------------------------------------------------------------------------------------|-----------------------------|
| Al Hadidi et al. 2019 | Safety analysis of five randomized controlled studies of daratumumab in patients with multiple myeloma                                                                                                                                                                                     | Conference abstract         |
| Bahlis et al. 2019    | Randomized Phase 2 Study of Subcutaneous Daratumumab Plus Carfilzomib/Dexamethasone Versus Carfilzomib/Dexamethasone Alone in Patients with Multiple Myeloma Who Have Been Previously Treated with Intravenous Daratumumab to Evaluate Retreatment (LYNX)                                  | Protocol                    |
| -                     | Efficacy of Daratumumab (dara) retreatment using a histone deacetylase-inhibitor (HDACi: panobinostat) as a dara-longevity-inducing, epigenetic agent in combination with bortezomib-dexamethasone as a quadruplet in relapsed / refractory multiple myeloma (RRMM) patients               | Protocol                    |
| Euctr, S. E. 2014     | A Study Comparing Daratumumab, Lenalidomide, and Dexamethasone with Lenalidomide and Dexamethasone in Relapsed or Refractory Multiple Myeloma                                                                                                                                              | Protocol                    |
| Euctr, H. U. 2015     | A Study of Combination of Daratumumanb and Velcade (Bortezomib) Melphalan-Prednisone (DVMP) Compared to Velcade Melphalan-Prednisone (VMP) in Participants with Previously Untreated Multiple Myeloma                                                                                      | Protocol                    |
| Euctr, G. R. 2018     | A Study of combination of Daratumumab, VELCADE (bortezomib), Lenalidomide, and Dexamethasone (D-VRd) compared to VELCADE, Lenalidomide, and Dexamethasone (VRd) in participants with Previously Untreated Multiple Myeloma                                                                 | Protocol                    |
| Euctr, F. R. 2019     | IFM 2017-03                                                                                                                                                                                                                                                                                | Protocol                    |
| Euctr, E. S. 2018     | A Clinical Study to Compare Daratumumab, VELCADE (bortezomib), Lenalidomide, and Dexamethasone (D-VRd) with VELCADE, Lenalidomide, and Dexamethasone (VRd) in Subjects with Untreated Bone Marrow Cancer and for Whom Hematopoietic Stem Cell Transplant is Not Planned as Initial Therapy | Protocol                    |
| Euctr, B. E. 2017     | A Randomized, Open-label, Phase 3 Study Comparing Carfilzomib, Dexamethasone, and Daratumumab to Carfilzomib and Dexamethasone for the treatment of Patients With Relapsed or Refractory Multiple Myeloma                                                                                  | Protocol                    |
| Euctr, A. T. 2015     | Study Comparing Daratumumab, Lenalidomide, and Dexamethasone With Lenalidomide and Dexamethasone in Participants with Previously Untreated Multiple Myeloma                                                                                                                                | Protocol                    |

**Supplementary Table 1:** Reasons of exclusion for individual studies in the full text assessment (continued)

|                       | <b>Study</b>                                                                                                                                                                  | <b>Reason for exclusion</b>         |
|-----------------------|-------------------------------------------------------------------------------------------------------------------------------------------------------------------------------|-------------------------------------|
| Ishida et al. 2018    | Therapeutic antibodies for multiple myeloma                                                                                                                                   | Review                              |
| Bhatnagar et al. 2017 | FDA Approval Summary: Daratumumab for Treatment of Multiple Myeloma After One Prior Therapy                                                                                   | Review                              |
| Al Hadidi et al. 2020 | Safety Analysis of Five Randomized Controlled Studies of Daratumumab in Patients With Multiple Myeloma                                                                        | Review                              |
| Cao et al. 2021       | Daratumumab provides a survival benefit in relapsed and refractory Multiple Myeloma, independent of baseline clinical characteristics: A meta-analysis                        | Review                              |
| -                     | Late Breaking: 61st ASH Annual Meeting Abstracts                                                                                                                              | Review                              |
| -                     | 17th International Myeloma Workshop                                                                                                                                           | Review                              |
| -                     | 2018 Annual Meeting of the American Society of Hematology, ASH 2018                                                                                                           | Review                              |
| Weisel et al. 2020    | Health-related quality of life of carfilzomib- and daratumumab-based therapies in patients with relapsed/refractory multiple myeloma, based on German benefit assessment data | Outcome of interest is not reported |
| Borelli et al. 2020   | Differences in safety profiles of newly approved medications for multiple myeloma in real-world settings versus randomized controlled trials                                  | Outcome of interest is not reported |

**Supplementary Figure 1:** Forest plot and Trial Sequential Analysis representing that addition of daratumumab to backbone therapies increases the chance for achieving minimal residual disease negativity in newly diagnosed multiple myeloma

## Studies

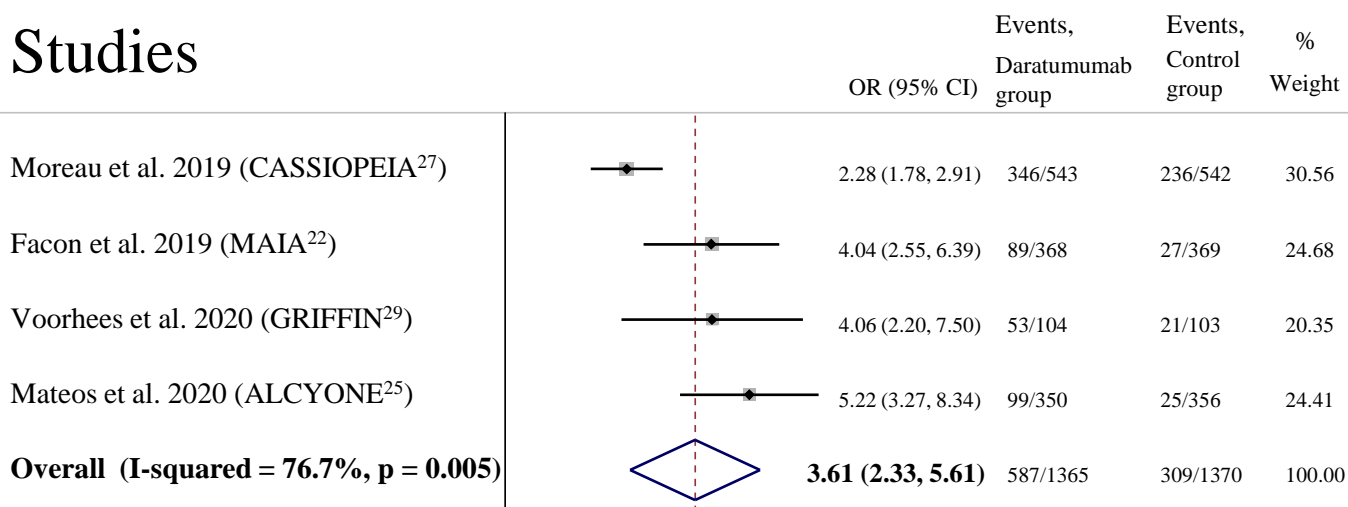

NOTE: Weights are from random effects analysis

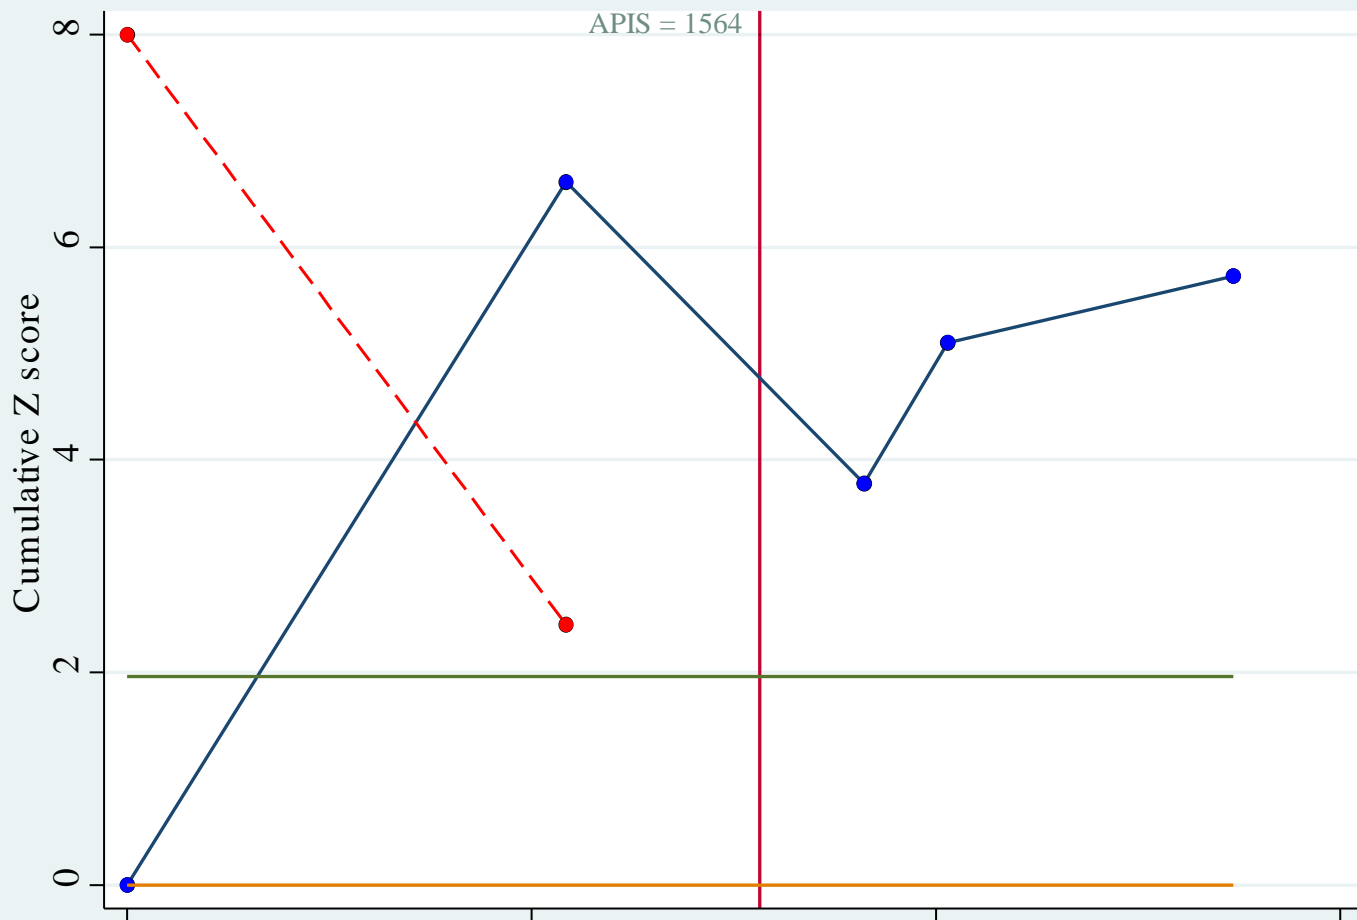

**Supplementary Figure 2: Risk of bias assessment at study level and at domain level regarding minimal residual disease negativity in newly diagnosed multiple myeloma**

DRVd, daratumumab, bortezomib, lenalidomide and dexamethasone; RVd, bortezomib, lenalidomide and dexamethasone; DVMP, daratumumab, bortezomib, melphalan, and prednisone; VMP, bortezomib, melphalan, and prednisone; DVTd, daratumumab, bortezomib, thalidomide, and dexamethasone; VTd, bortezomib, thalidomide, and dexamethasone; DRd, daratumumab, lenalidomide and dexamethasone; Rd, lenalidomide and dexamethasone

| Study                | Interventions | Randomization process | Deviations from intended interventions | Missing outcome data | Measurement of the outcome | Selection of the reported results | Overall assessment |
|----------------------|---------------|-----------------------|----------------------------------------|----------------------|----------------------------|-----------------------------------|--------------------|
| Voorhees et al. 2020 | DRVd vs RVd   | ?                     | +                                      | ?                    | +                          | +                                 | ?                  |
| Mateos et al. 2020   | DVMP vs VMP   | +                     | +                                      | +                    | +                          | +                                 | +                  |
| Moreau et al. 2019   | DVTd vs VTd   | +                     | +                                      | +                    | +                          | ?                                 | +                  |
| Facon et al. 2019    | DRd vs Rd     | +                     | +                                      | +                    | +                          | +                                 | +                  |

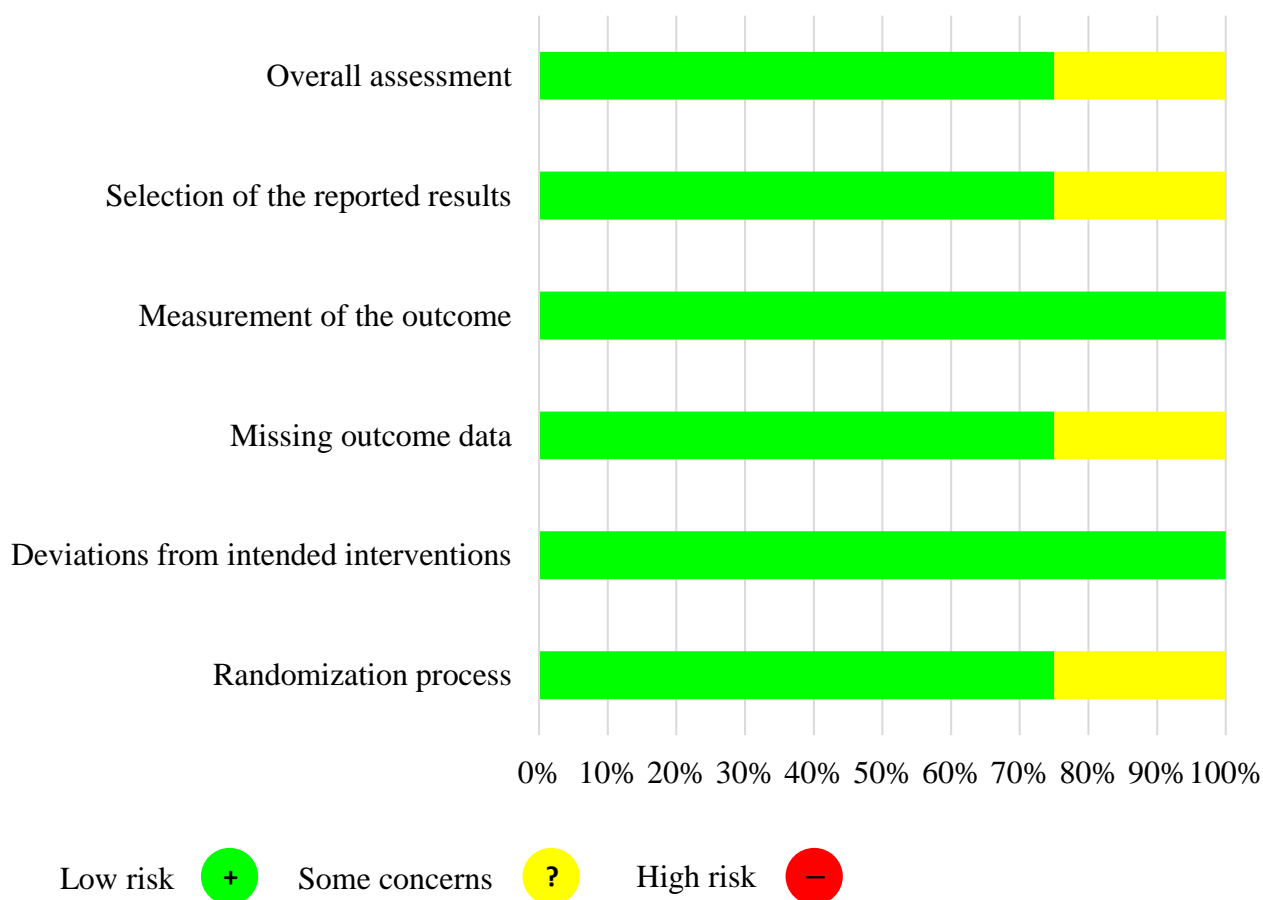

**Supplementary Figure 3:** Forest plot and Trial Sequential Analysis representing that addition of daratumumab to backbone therapies increases the chance for achieving stringent complete response in newly diagnosed multiple myeloma

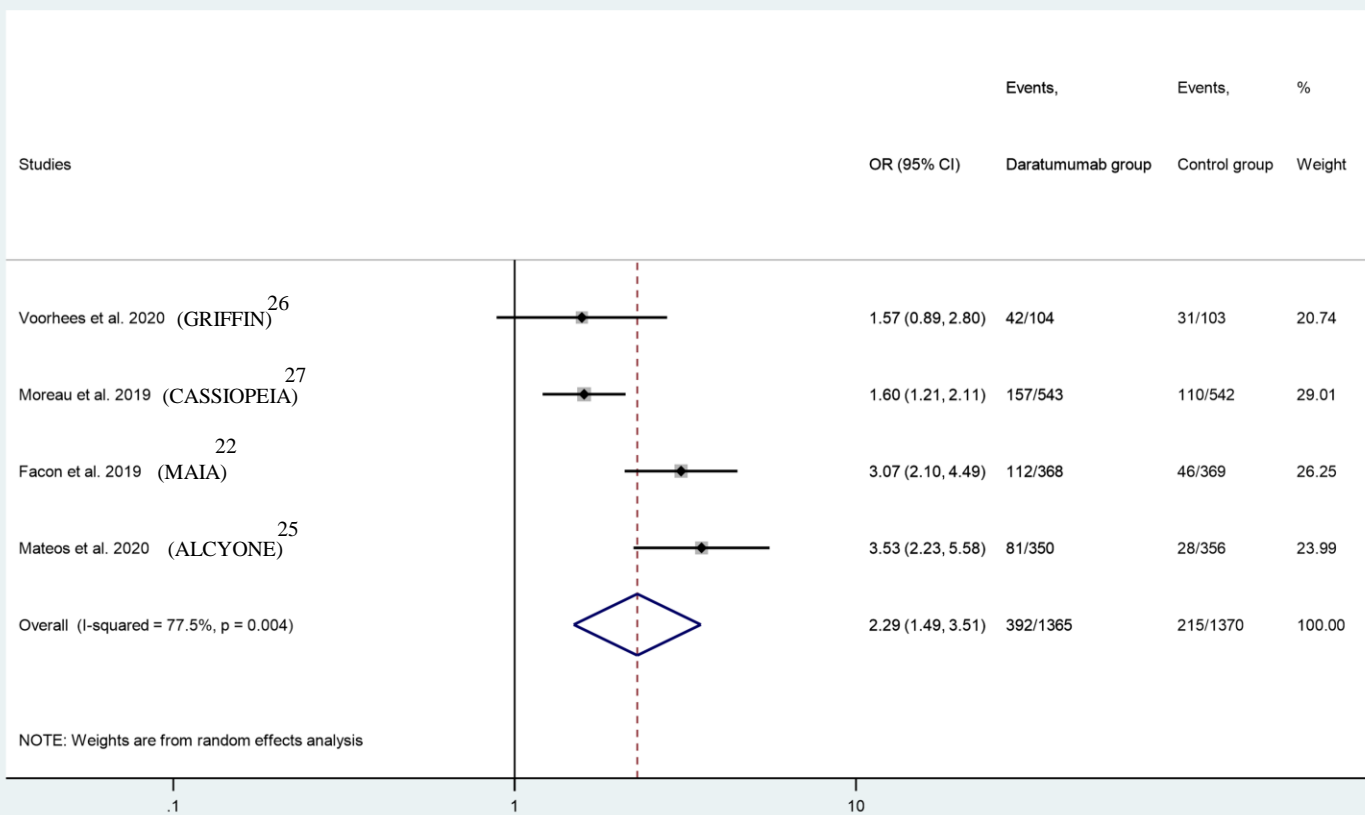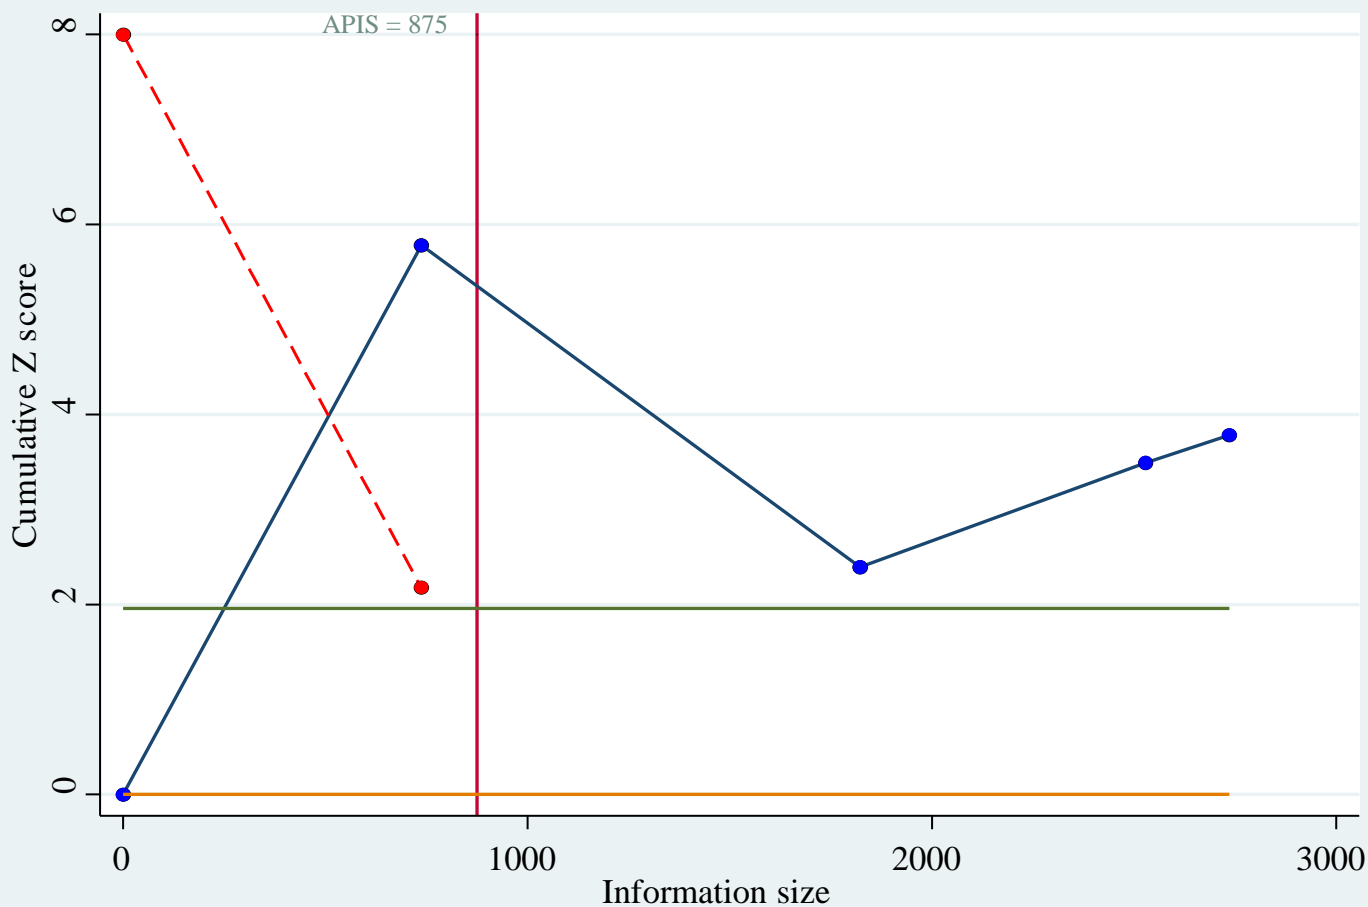

**Supplementary Figure 4: Risk of bias assessment at study level and at domain level regarding stringent complete response in newly diagnosed multiple myeloma**

DRVd, daratumumab, bortezomib, lenalidomide and dexamethasone; RVd, bortezomib, lenalidomide and dexamethasone; DVMP, daratumumab, bortezomib, melphalan, and prednisone; VMP, bortezomib, melphalan, and prednisone; DVTd, daratumumab, bortezomib, thalidomide, and dexamethasone; VTd, bortezomib, thalidomide, and dexamethasone; DRd, daratumumab, lenalidomide and dexamethasone; Rd, lenalidomide and dexamethasone

| Study                | Interventions | Randomization process | Deviations from intended interventions | Missing outcome data | Measurement of the outcome | Selection of the reported results | Overall assessment |
|----------------------|---------------|-----------------------|----------------------------------------|----------------------|----------------------------|-----------------------------------|--------------------|
| Voorhees et al. 2020 | DRVd vs RVd   | ?                     | +                                      | +                    | +                          | +                                 | ?                  |
| Mateos et al. 2020   | DVMP vs VMP   | +                     | +                                      | +                    | +                          | +                                 | +                  |
| Moreau et al. 2019   | DVTd vs VTd   | +                     | +                                      | +                    | +                          | ?                                 | +                  |
| Facon et al. 2019    | DRd vs Rd     | +                     | +                                      | +                    | +                          | +                                 | +                  |

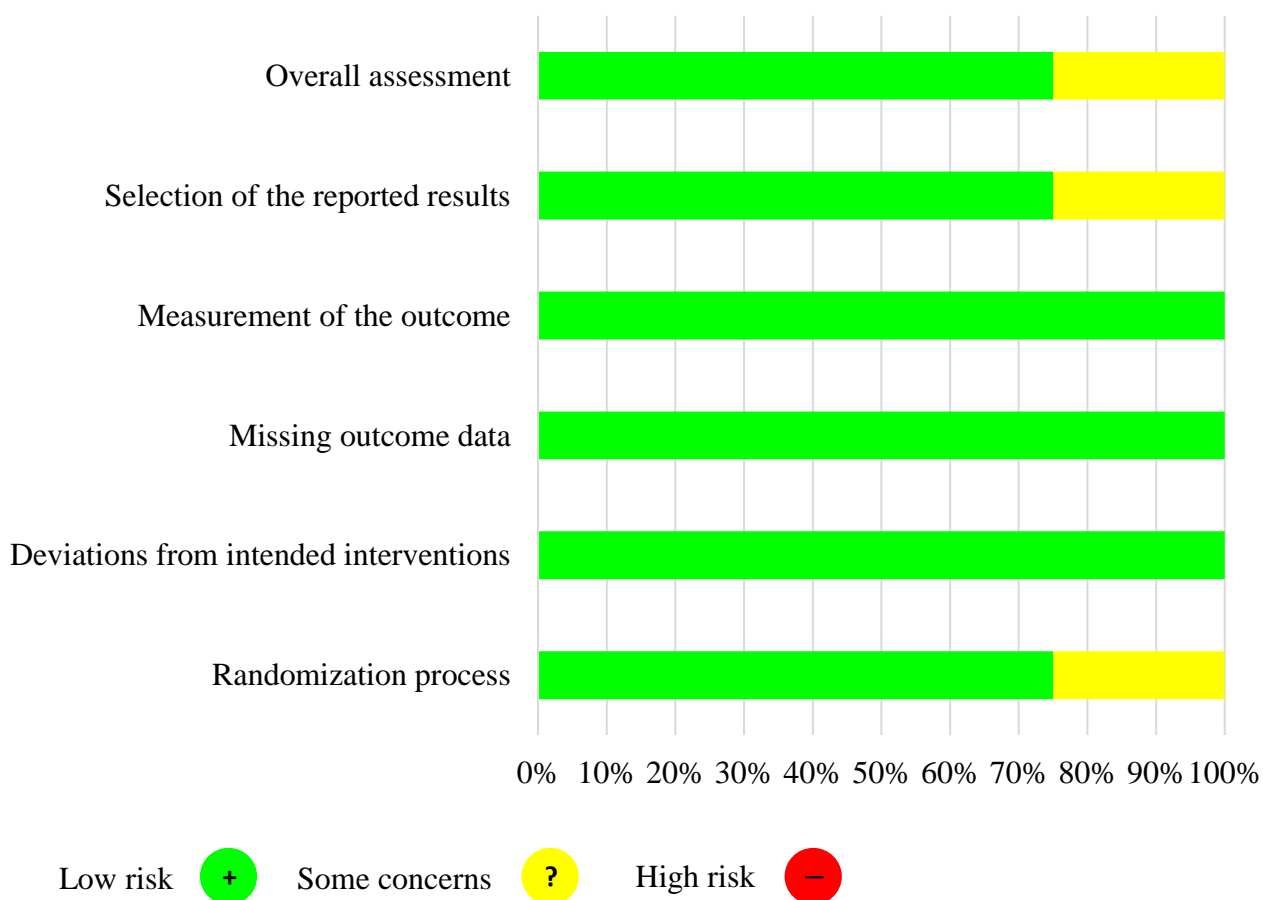



**Supplementary Figure 5:** Forest plot and Trial Sequential Analysis representing that addition of daratumumab to backbone therapies increases the chance for achieving complete response or better in newly diagnosed multiple myeloma

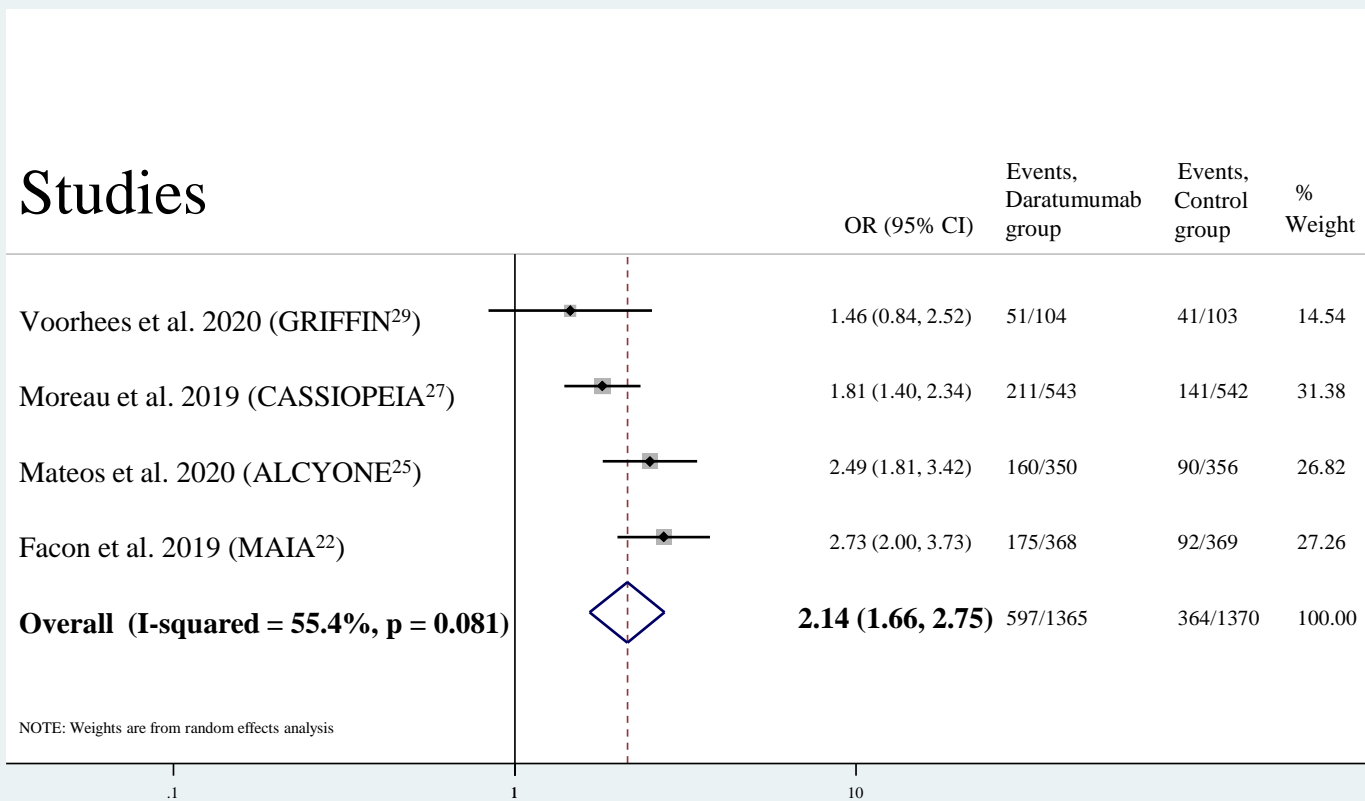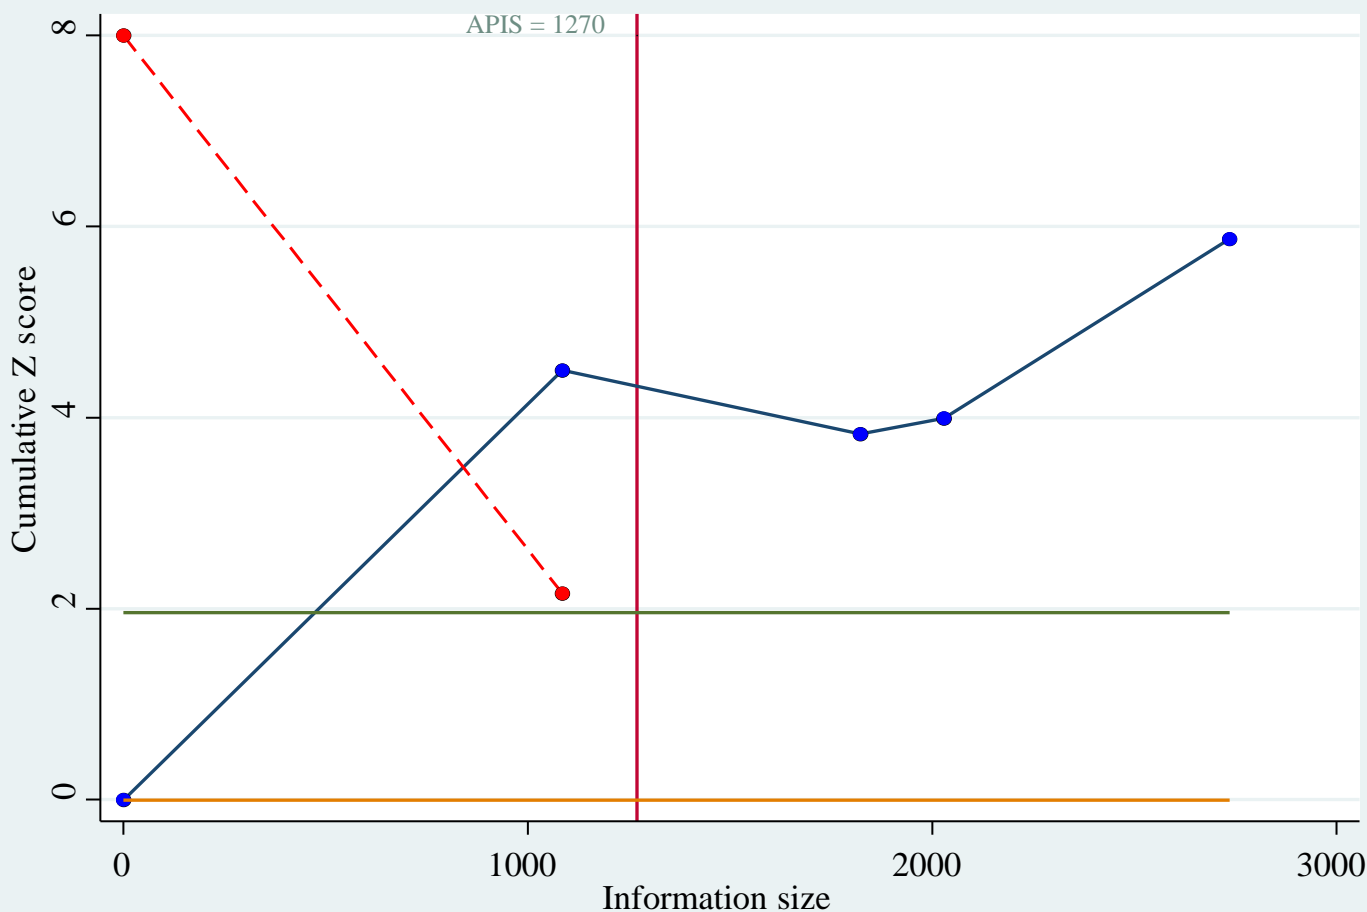

**Supplementary Figure 6:** Risk of bias assessment at study level and at domain level regarding complete response or better in newly diagnosed multiple myeloma

DRVd, daratumumab, bortezomib, lenalidomide and dexamethasone; RVd, bortezomib, lenalidomide and dexamethasone; DVMP, daratumumab, bortezomib, melphalan, and prednisone; VMP, bortezomib, melphalan, and prednisone; DVTd, daratumumab, bortezomib, thalidomide, and dexamethasone; VTd, bortezomib, thalidomide, and dexamethasone; DRd, daratumumab, lenalidomide and dexamethasone; Rd, lenalidomide and dexamethasone

| Study                | Interventions | Randomization process | Deviations from intended interventions | Missing outcome data | Measurement of the outcome | Selection of the reported results | Overall assessment |
|----------------------|---------------|-----------------------|----------------------------------------|----------------------|----------------------------|-----------------------------------|--------------------|
| Voorhees et al. 2020 | DRVd vs RVd   | ?                     | +                                      | +                    | +                          | +                                 | ?                  |
| Mateos et al. 2020   | DVMP vs VMP   | +                     | +                                      | +                    | +                          | +                                 | +                  |
| Moreau et al. 2019   | DVTd vs VTd   | +                     | +                                      | +                    | +                          | ?                                 | +                  |
| Facon et al. 2019    | DRd vs Rd     | +                     | +                                      | +                    | +                          | +                                 | +                  |

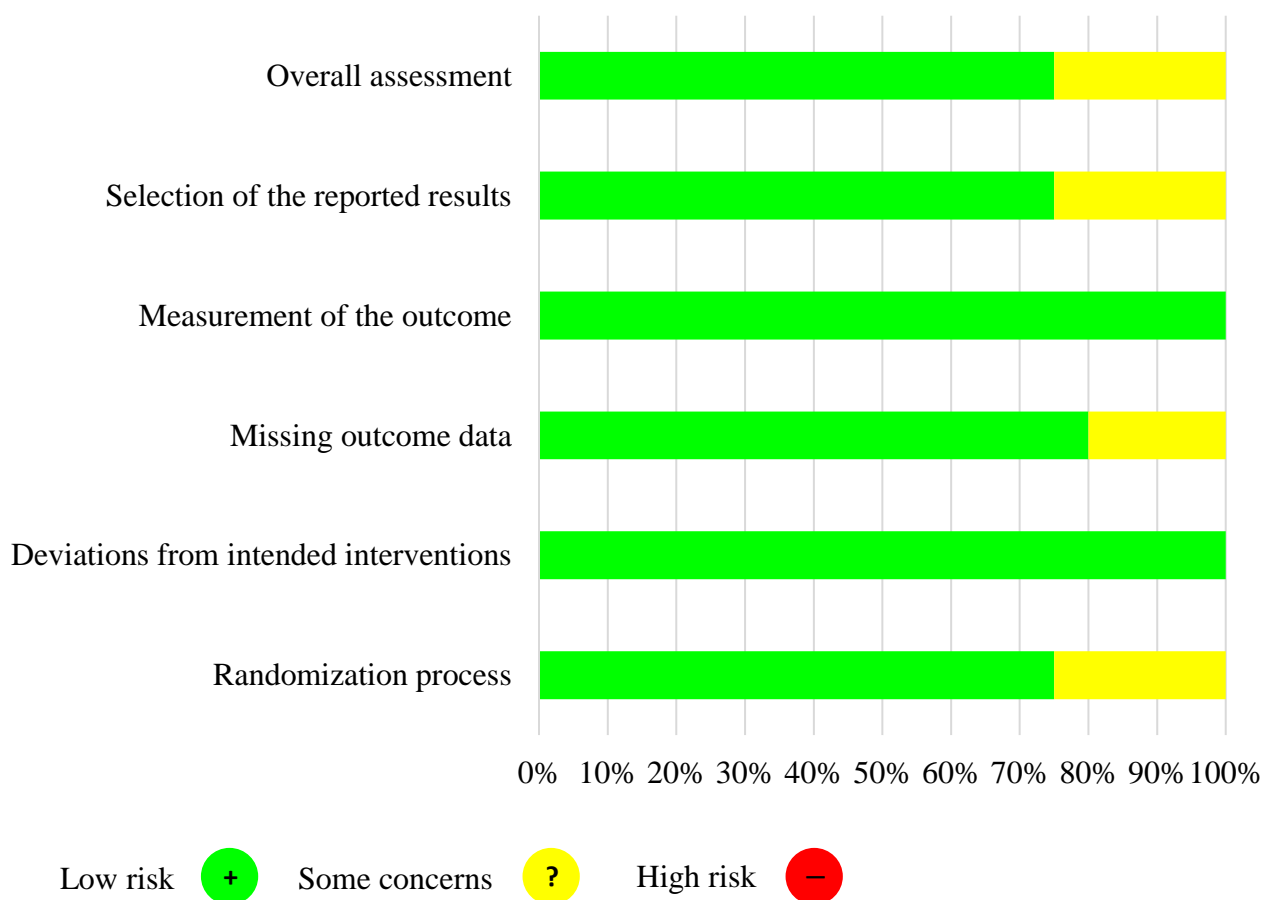

**Supplementary Figure 7:** Forest plot and Trial Sequential Analysis representing that addition of daratumumab to backbone therapies decreases the chance for death or disease progression in newly diagnosed multiple myeloma

## Studies

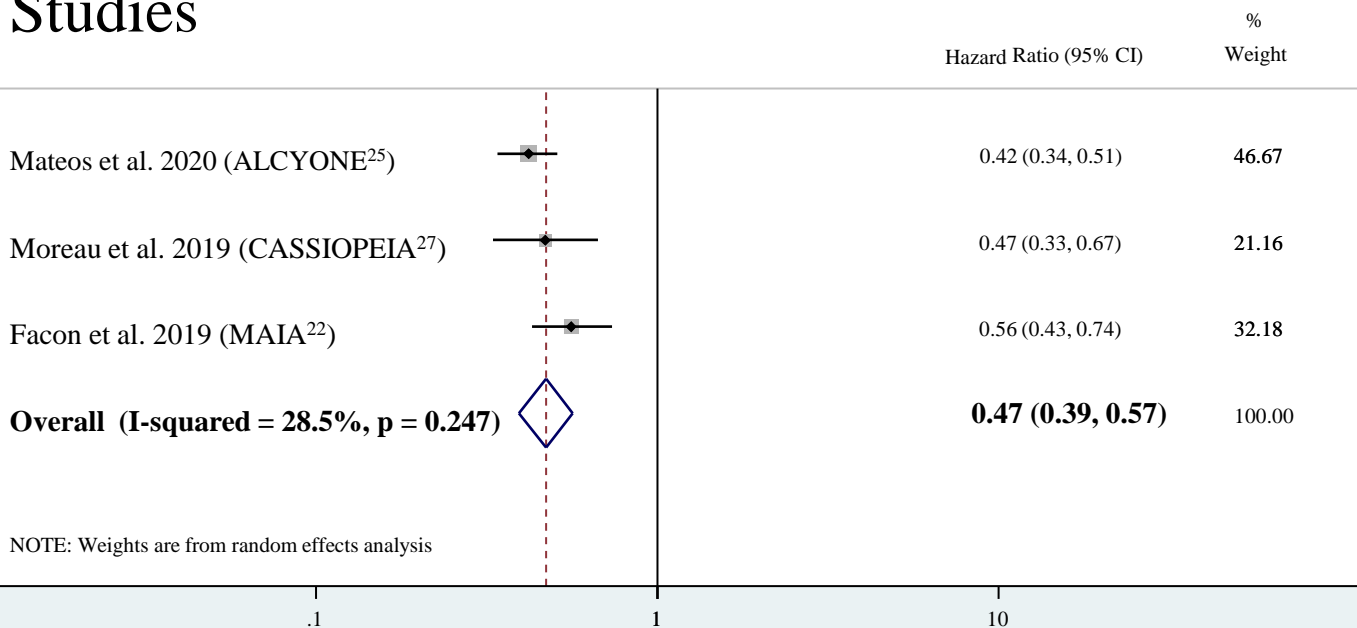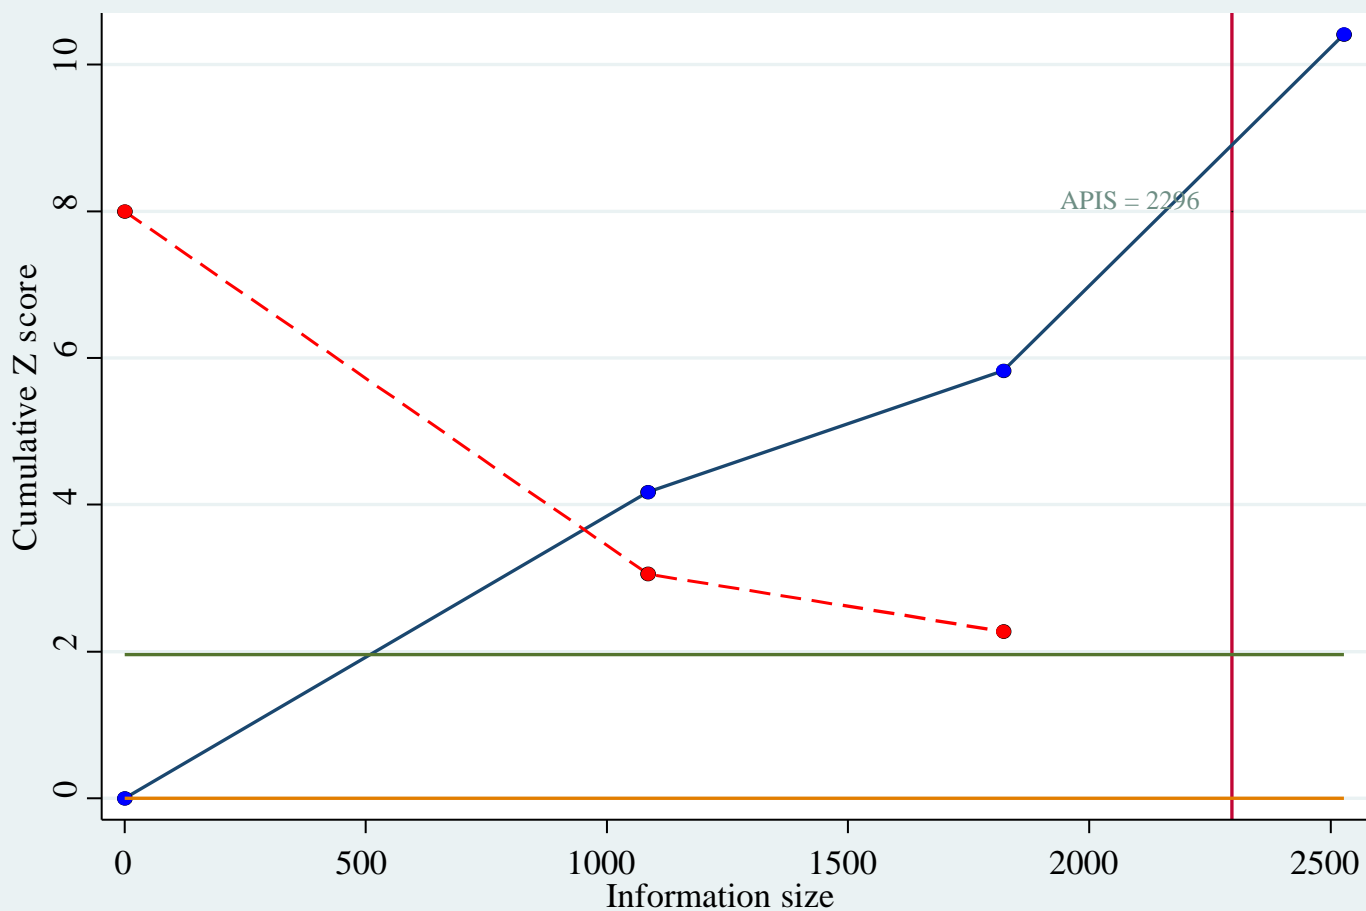

**Supplementary Figure 8:** Risk of bias assessment at study level and at domain level regarding death or disease progression in newly diagnosed multiple myeloma

DVMP, daratumumab, bortezomib, melphalan, and prednisone; VMP, bortezomib, melphalan, and prednisone; DVTd, daratumumab, bortezomib, thalidomide, and dexamethasone; VTd, bortezomib, thalidomide, and dexamethasone; DRd, daratumumab, lenalidomide and dexamethasone; Rd, lenalidomide and dexamethasone

| Study              | Interventions | Randomization process | Deviations from intended interventions | Missing outcome data | Measurement of the outcome | Selection of the reported results | Overall assessment |
|--------------------|---------------|-----------------------|----------------------------------------|----------------------|----------------------------|-----------------------------------|--------------------|
| Mateos et al. 2020 | DVMP vs VMP   | +                     | +                                      | +                    | +                          | +                                 | +                  |
| Moreau et al. 2019 | DVTd vs VTd   | +                     | +                                      | +                    | +                          | ?                                 | +                  |
| Facon et al. 2019  | DRd vs Rd     | +                     | +                                      | +                    | +                          | +                                 | +                  |

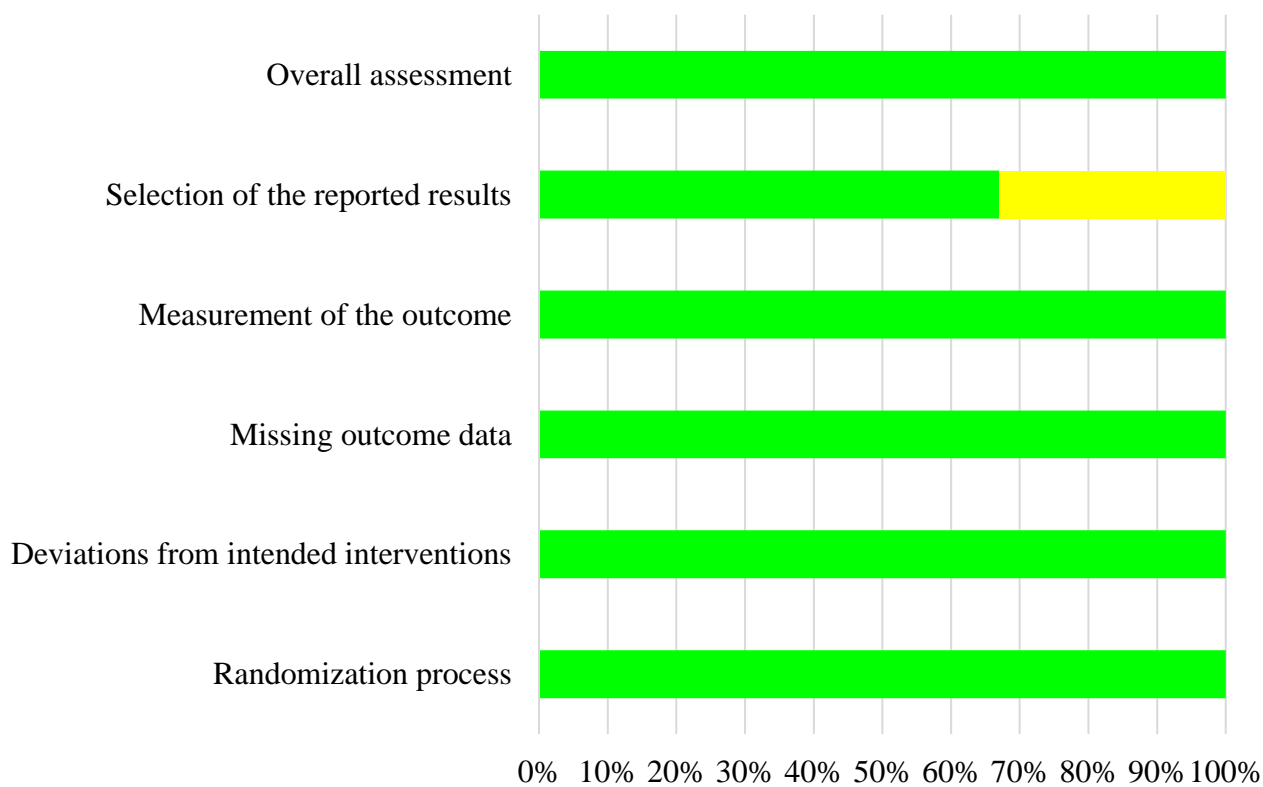

Low risk +    Some concerns ?    High risk -

**Supplementary Figure 9:** Forest plot and Trial Sequential Analysis representing that addition of daratumumab to backbone therapies decreases the chance for death or disease progression in high cytogenetic risk newly diagnosed multiple myeloma

## Studies

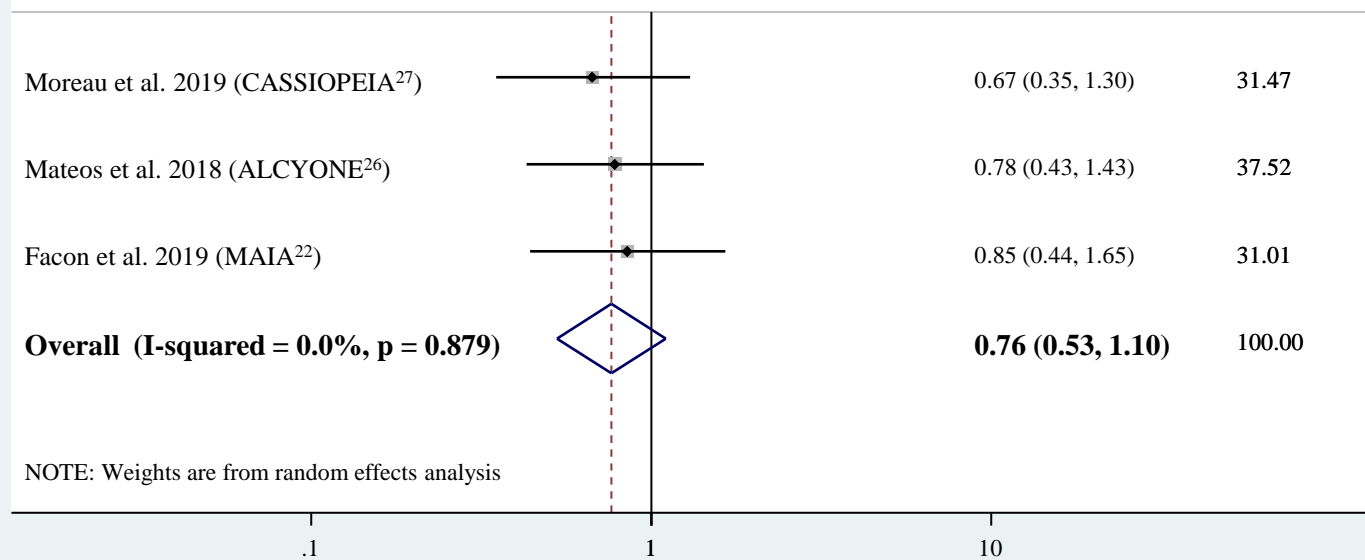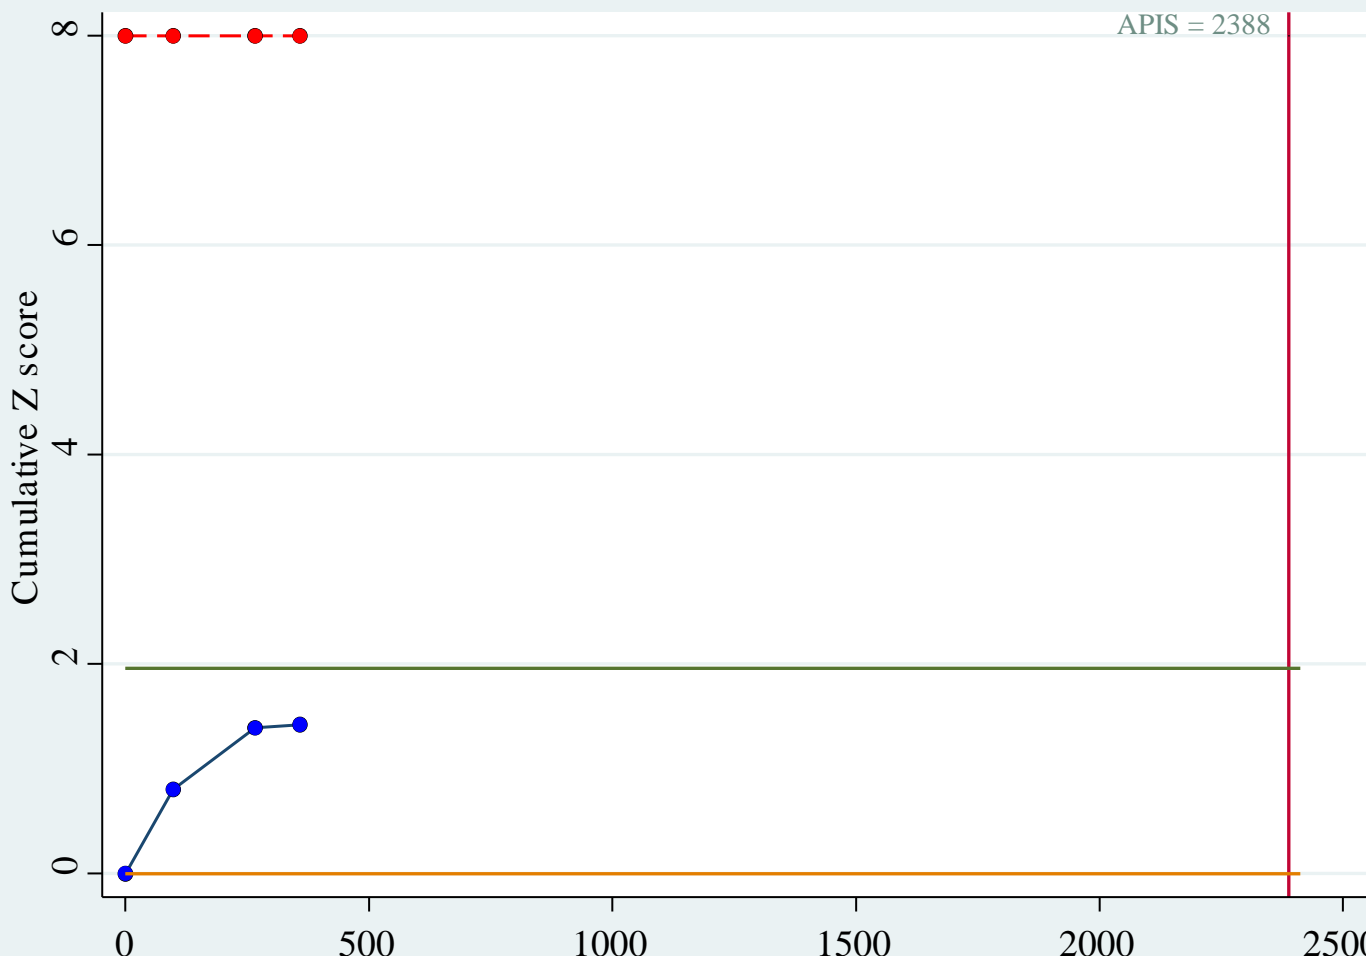

**Supplementary Figure 10:** Risk of bias assessment at study level and at domain level regarding death or disease progression in high cytogenetic risk newly diagnosed multiple myeloma

DVMP, daratumumab, bortezomib, melphalan, and prednisone; VMP, bortezomib, melphalan, and prednisone; DVTd, daratumumab, bortezomib, thalidomide, and dexamethasone; VTd, bortezomib, thalidomide, and dexamethasone; DRd, daratumumab, lenalidomide and dexamethasone; Rd, lenalidomide and dexamethasone

| Study              | Interventions | Randomization process | Deviations from intended interventions | Missing outcome data | Measurement of the outcome | Selection of the reported results | Overall assessment |
|--------------------|---------------|-----------------------|----------------------------------------|----------------------|----------------------------|-----------------------------------|--------------------|
| Mateos et al. 2020 | DVMP vs VMP   | +                     | +                                      | +                    | +                          | +                                 | +                  |
| Moreau et al. 2019 | DVTd vs VTd   | +                     | +                                      | +                    | +                          | ?                                 | +                  |
| Facon et al. 2019  | DRd vs Rd     | +                     | +                                      | +                    | +                          | +                                 | +                  |

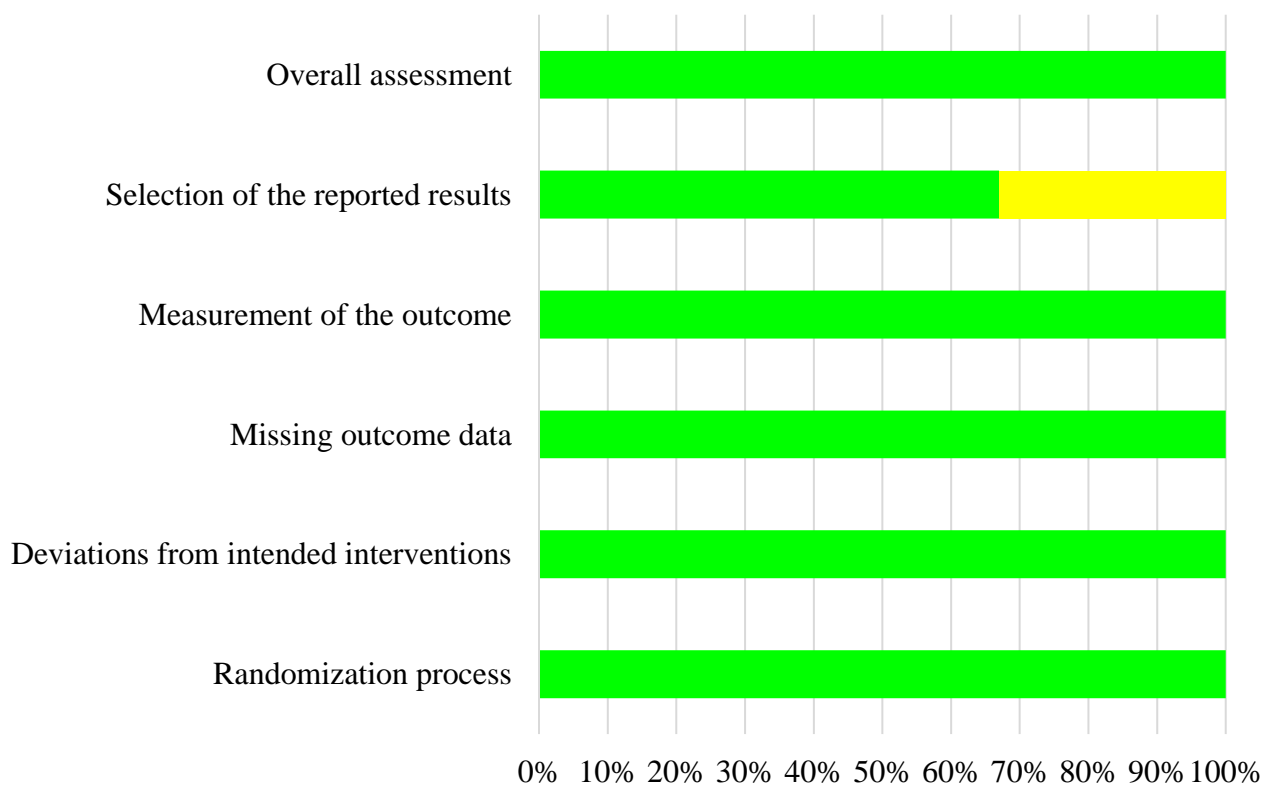

Low risk +    Some concerns ?    High risk -

**Supplementary Figure 11:** Forest plot and Trial Sequential Analysis representing that addition of daratumumab to backbone therapies decreases the chance for death or disease progression in standard cytogenetic risk newly diagnosed multiple myeloma

## Studies

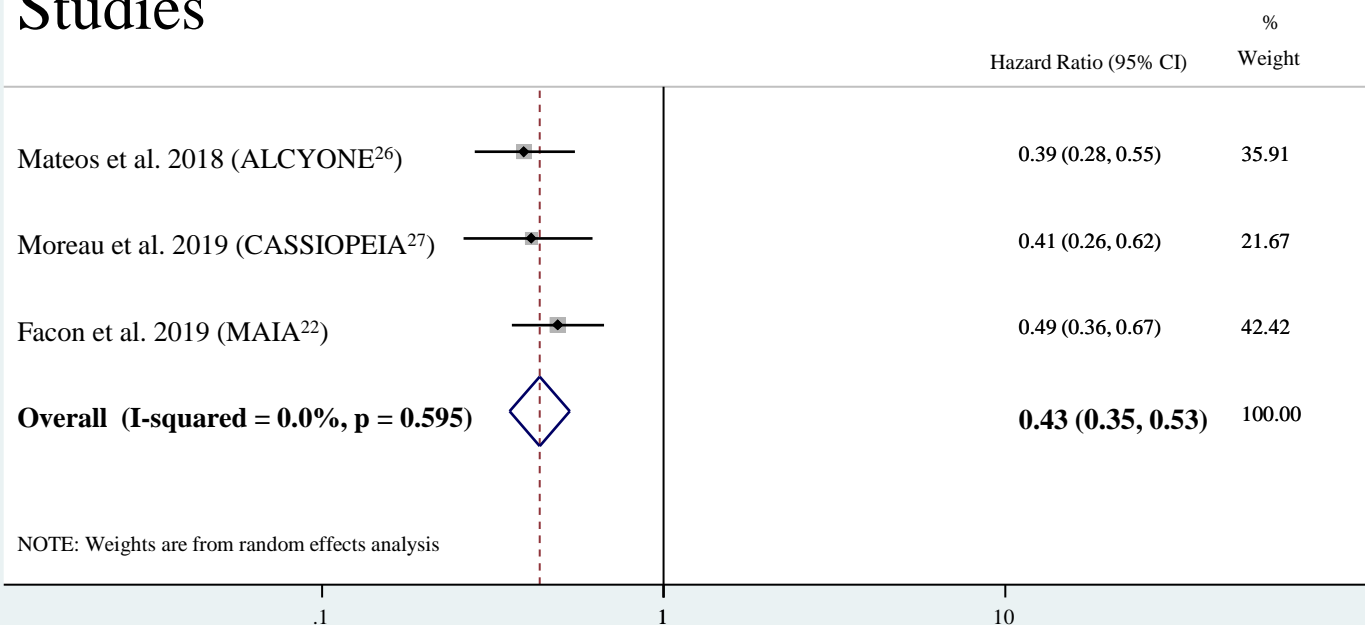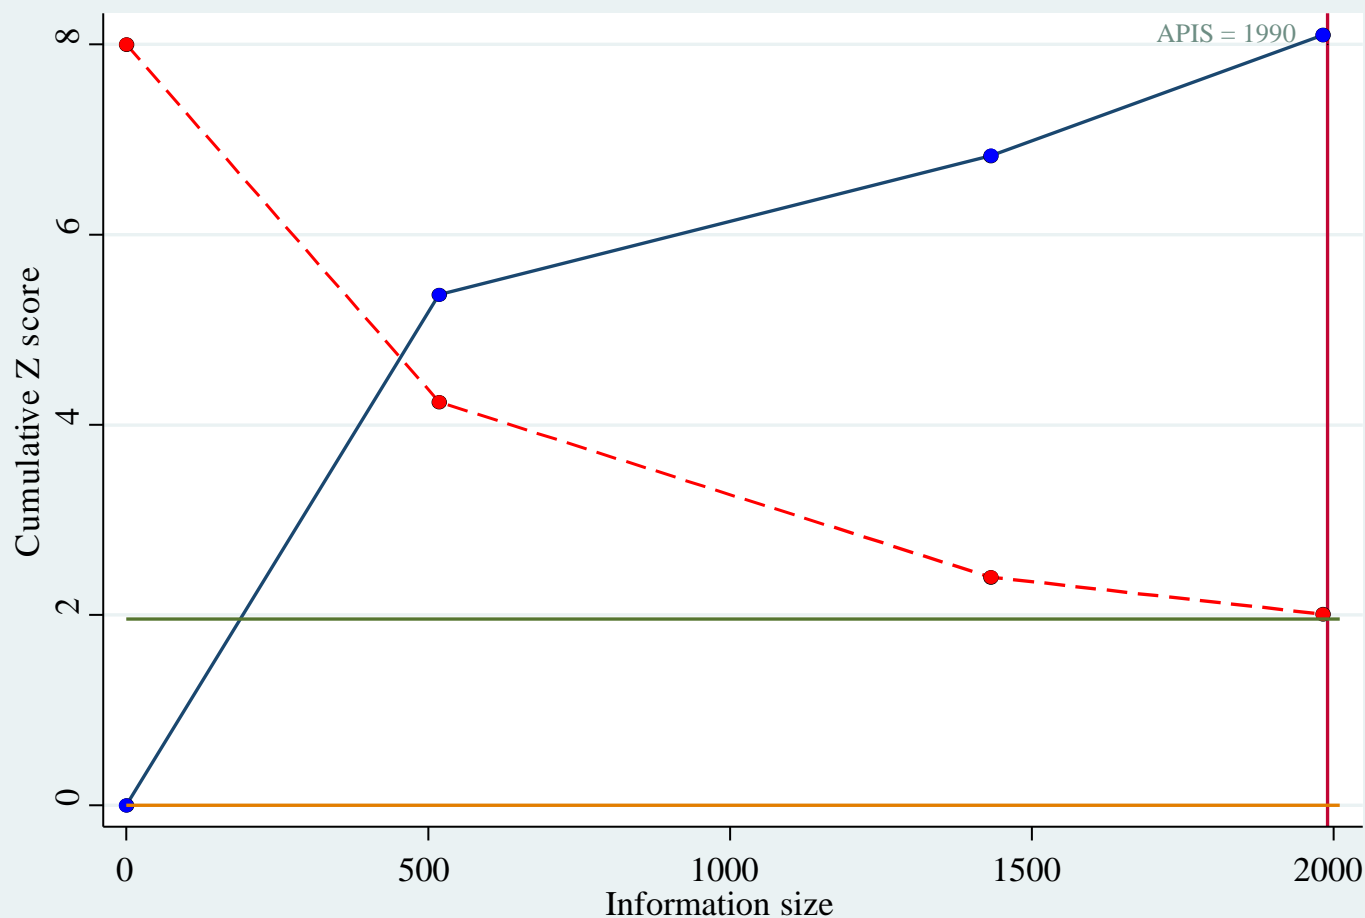

**Supplementary Figure 12:** Risk of bias assessment at study level and at domain level regarding death or disease progression in standard cytogenetic risk newly diagnosed multiple myeloma

DVMP, daratumumab, bortezomib, melphalan, and prednisone; VMP, bortezomib, melphalan, and prednisone; DVTd, daratumumab, bortezomib, thalidomide, and dexamethasone; VTd, bortezomib, thalidomide, and dexamethasone; DRd, daratumumab, lenalidomide and dexamethasone; Rd, lenalidomide and dexamethasone

| Study              | Interventions | Randomization process | Deviations from intended interventions | Missing outcome data | Measurement of the outcome | Selection of the reported results | Overall assessment |
|--------------------|---------------|-----------------------|----------------------------------------|----------------------|----------------------------|-----------------------------------|--------------------|
| Mateos et al. 2020 | DVMP vs VMP   | +                     | +                                      | +                    | +                          | +                                 | +                  |
| Moreau et al. 2019 | DVTd vs VTd   | +                     | +                                      | +                    | +                          | ?                                 | +                  |
| Facon et al. 2019  | DRd vs Rd     | +                     | +                                      | +                    | +                          | +                                 | +                  |

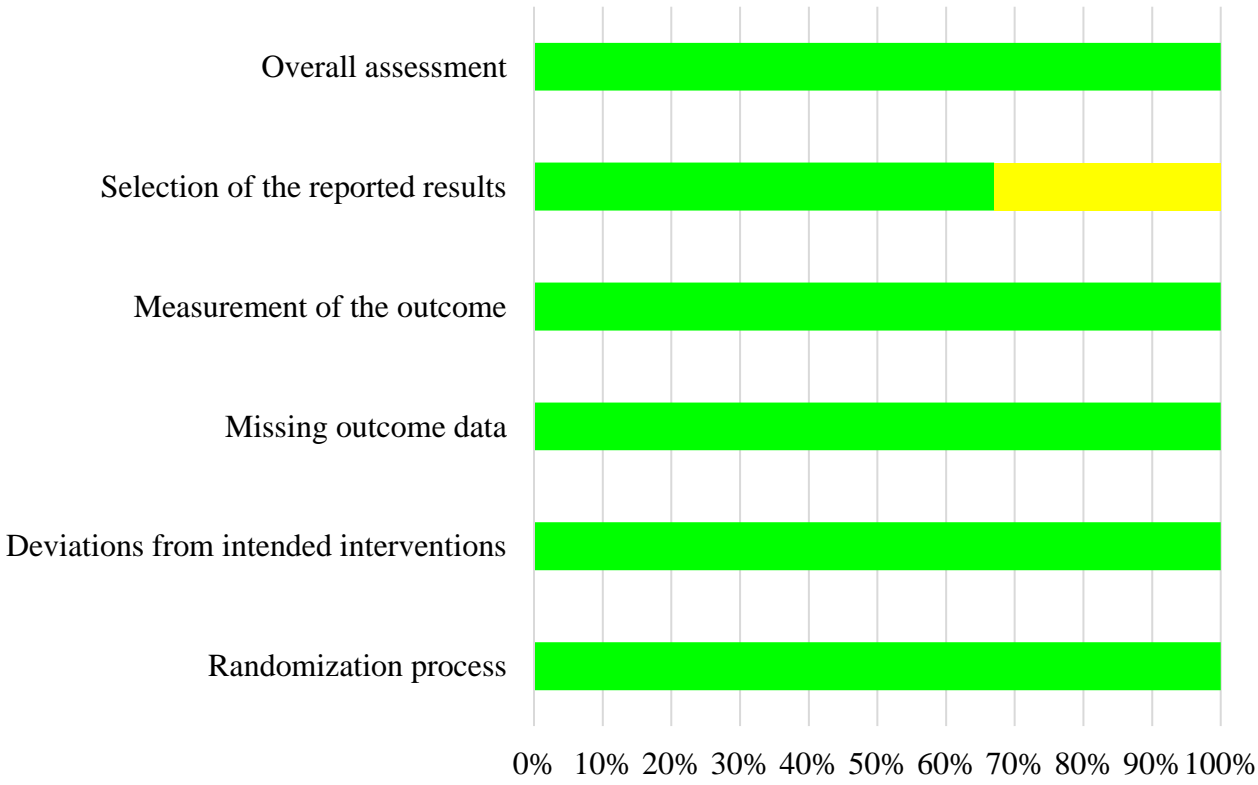

Low risk +    Some concerns ?    High risk -



**Supplementary Figure 13:** Forest plot and Trial Sequential Analysis representing that addition of daratumumab to backbone therapies does not increase the chance for all grade thrombocytopenia in newly diagnosed multiple myeloma

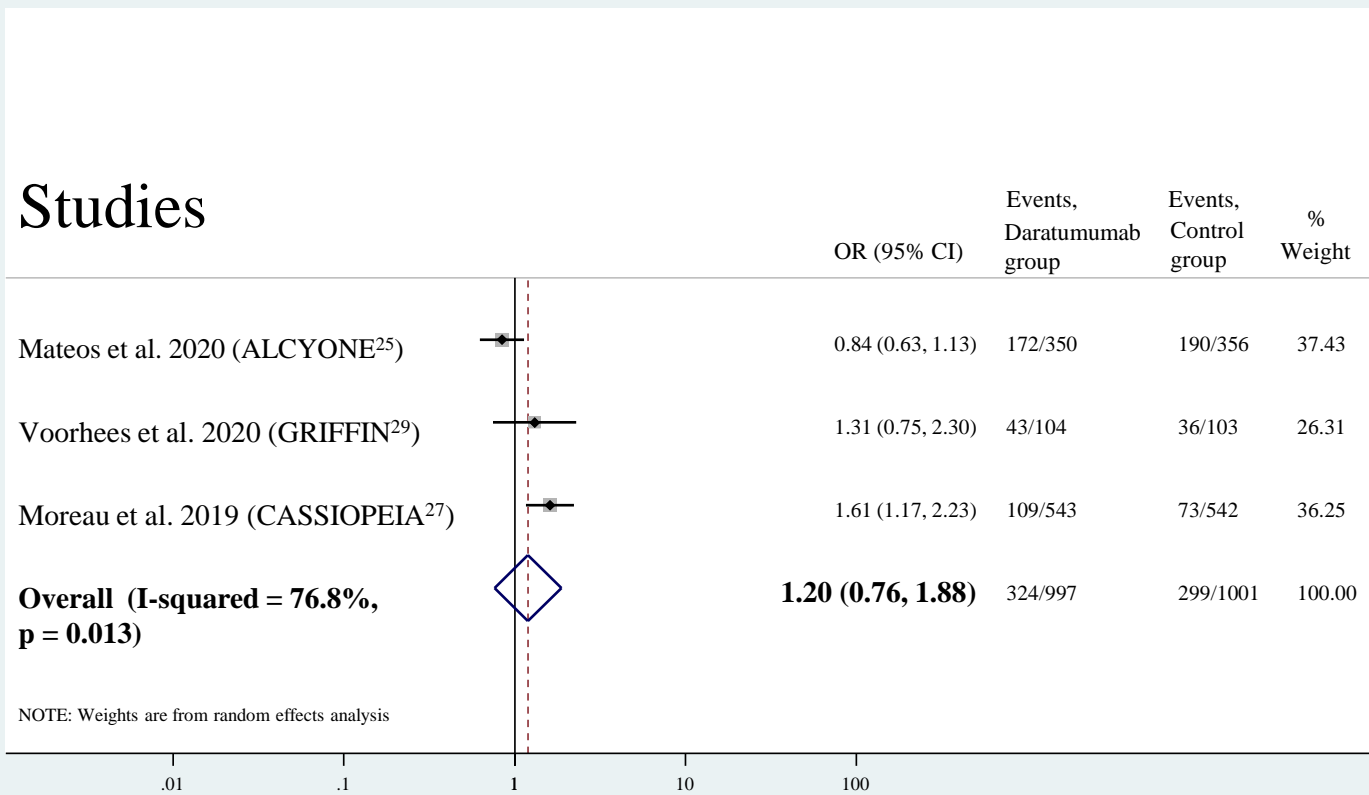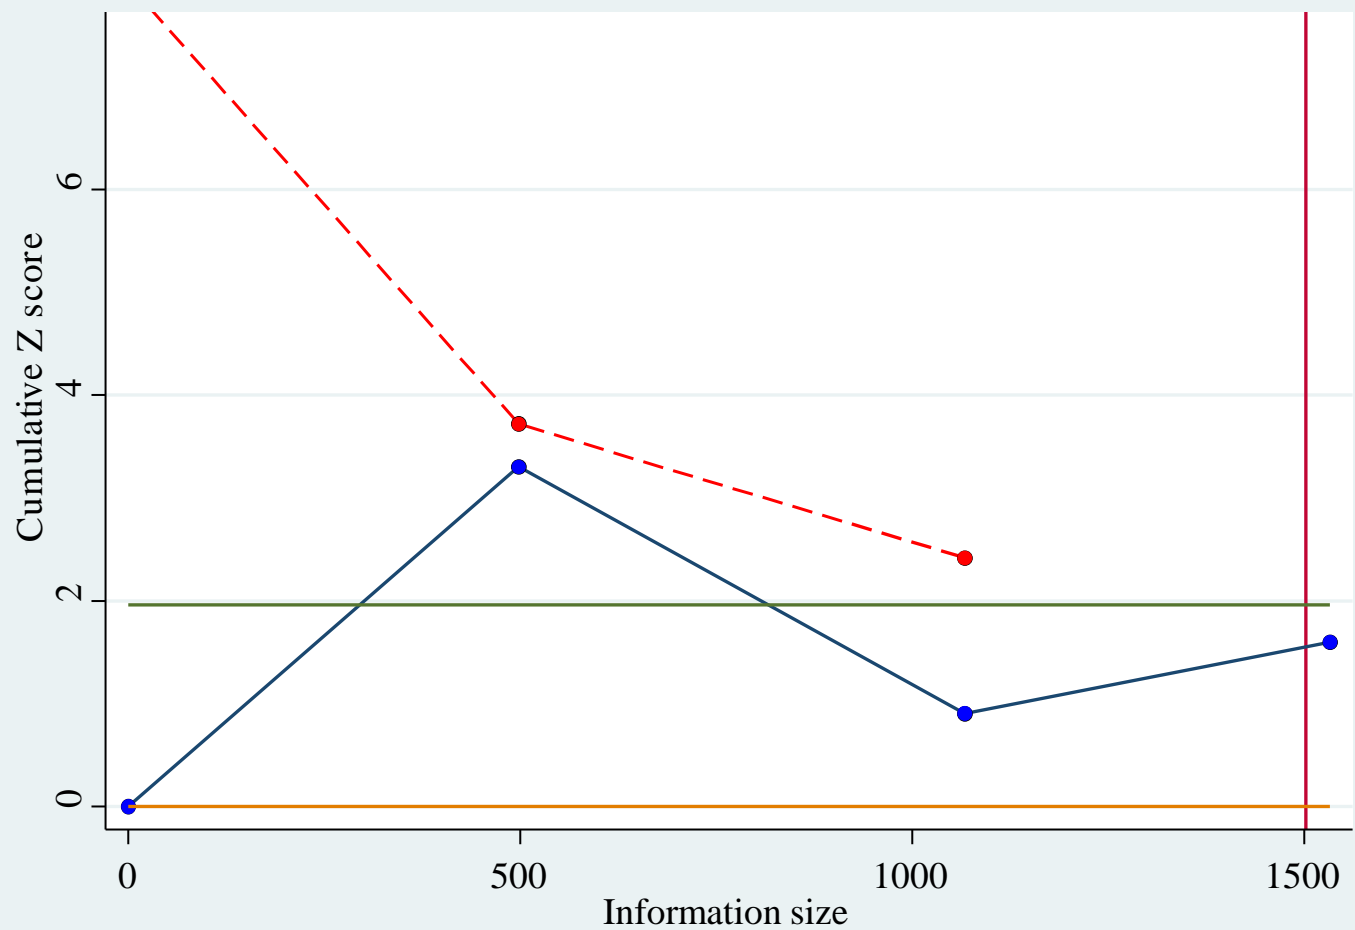

**Supplementary Figure 14:** Risk of bias assessment at study level and at domain level regarding all grade thrombocytopenia in newly diagnosed multiple myeloma

DVMP, daratumumab, bortezomib, melphalan, and prednisone; VMP, bortezomib, melphalan, and prednisone; DVTd, daratumumab, bortezomib, thalidomide, and dexamethasone; VTd, bortezomib, thalidomide, and dexamethasone; DRd, daratumumab, lenalidomide and dexamethasone; Rd, lenalidomide and dexamethasone

| Study                | Interventions | Randomization process | Deviations from intended interventions | Missing outcome data | Measurement of the outcome | Selection of the reported results | Overall assessment |
|----------------------|---------------|-----------------------|----------------------------------------|----------------------|----------------------------|-----------------------------------|--------------------|
| Voorhees et al. 2020 | DRVd vs RVd   | ?                     | +                                      | +                    | +                          | +                                 | ?                  |
| Moreau et al. 2019   | DVTd vs VTd   | +                     | +                                      | +                    | +                          | ?                                 | +                  |
| Mateos et al. 2020   | DVMP vs VMP   | +                     | +                                      | +                    | +                          | +                                 | +                  |

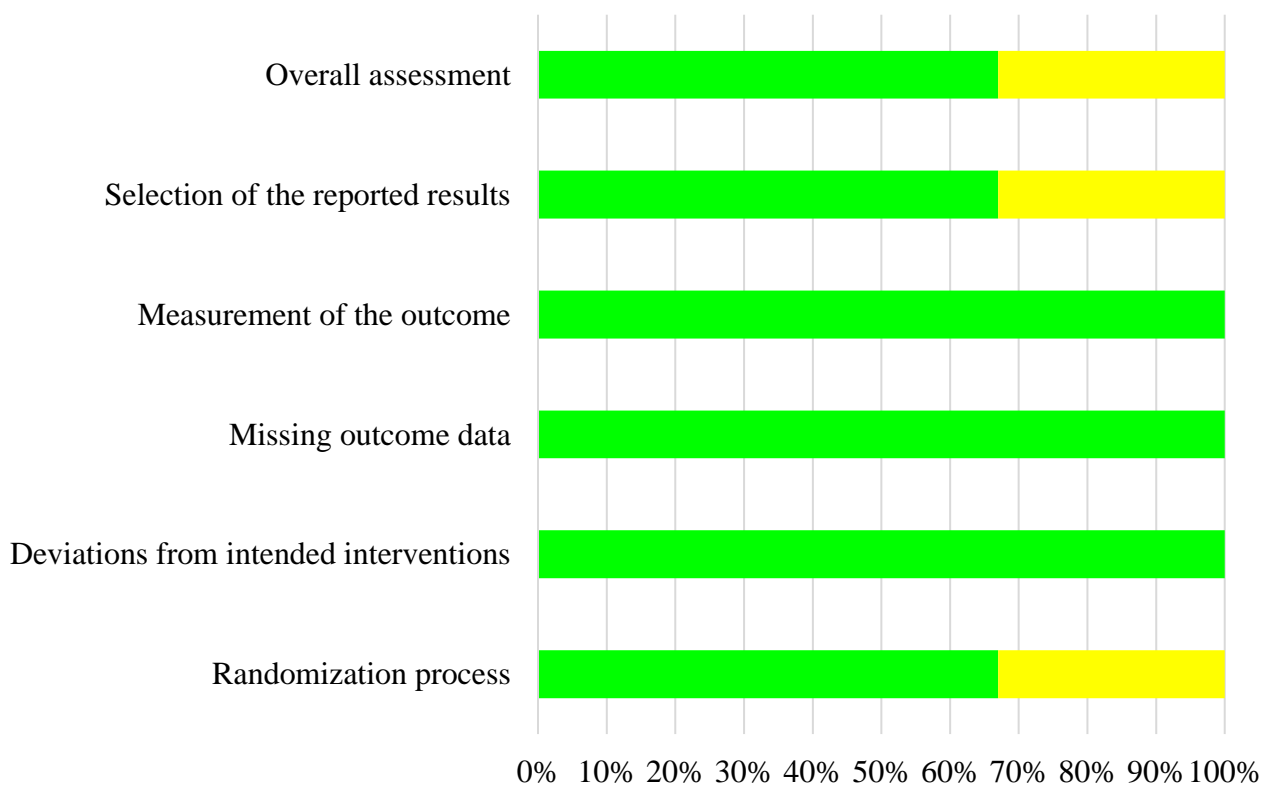

Low risk + Some concerns ? High risk -

**Supplementary Figure 15:** Forest plot and Trial Sequential Analysis representing that addition of daratumumab to backbone therapies does not increase the chance for grade 3-4 thrombocytopenia in newly diagnosed multiple myeloma

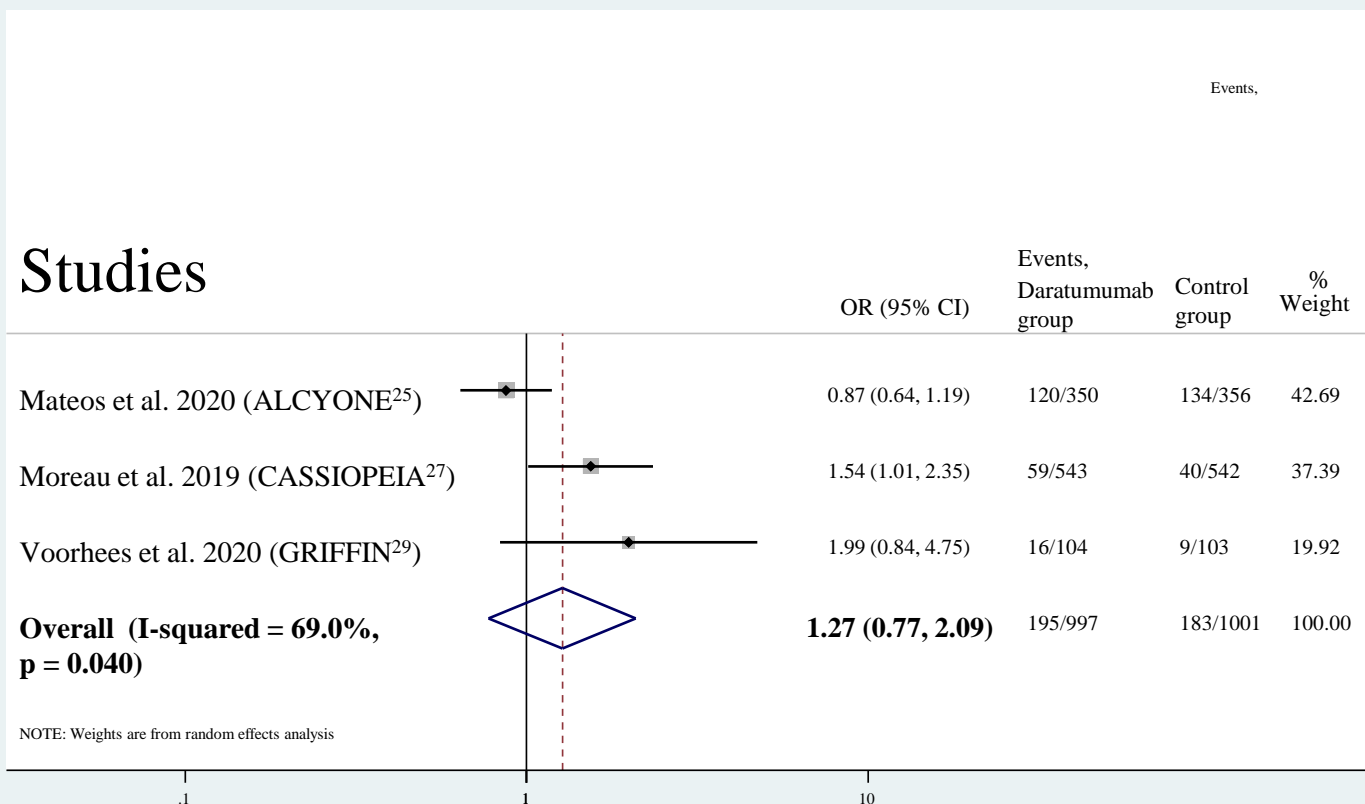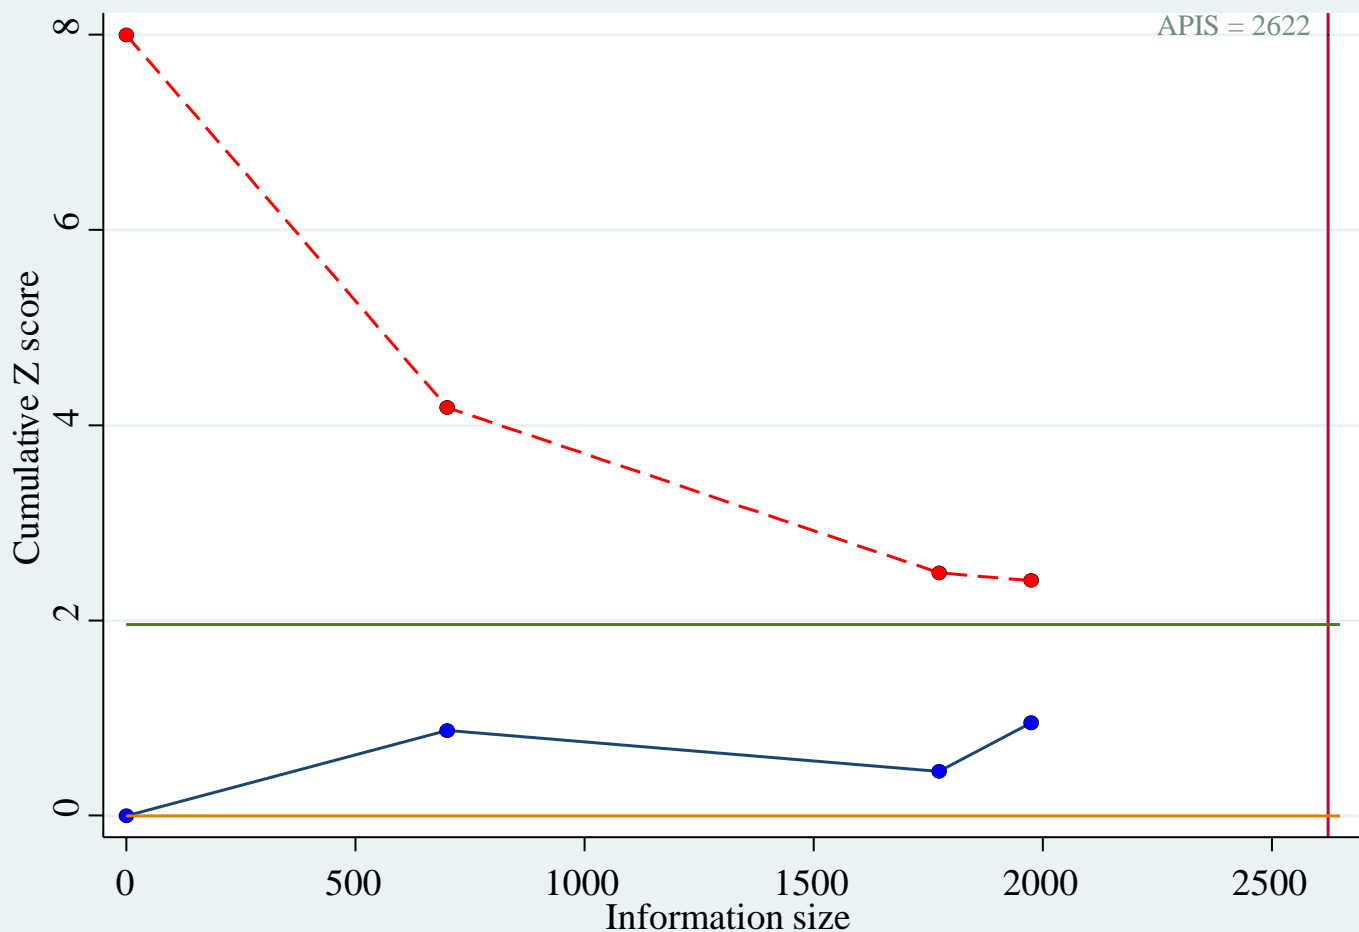

**Supplementary Figure 16:** Risk of bias assessment at study level and at domain level regarding grade 3-4 thrombocytopenia in newly diagnosed multiple myeloma

DVMP, daratumumab, bortezomib, melphalan, and prednisone; VMP, bortezomib, melphalan, and prednisone; DVTd, daratumumab, bortezomib, thalidomide, and dexamethasone; VTd, bortezomib, thalidomide, and dexamethasone; DRd, daratumumab, lenalidomide and dexamethasone; Rd, lenalidomide and dexamethasone

| Study                | Interventions | Randomization process | Deviations from intended interventions | Missing outcome data | Measurement of the outcome | Selection of the reported results | Overall assessment |
|----------------------|---------------|-----------------------|----------------------------------------|----------------------|----------------------------|-----------------------------------|--------------------|
| Voorhees et al. 2020 | DRVd vs RVd   | ?                     | +                                      | +                    | +                          | +                                 | ?                  |
| Moreau et al. 2019   | DVTd vs VTd   | +                     | +                                      | +                    | +                          | ?                                 | +                  |
| Mateos et al. 2020   | DVMP vs VMP   | +                     | +                                      | +                    | +                          | +                                 | +                  |

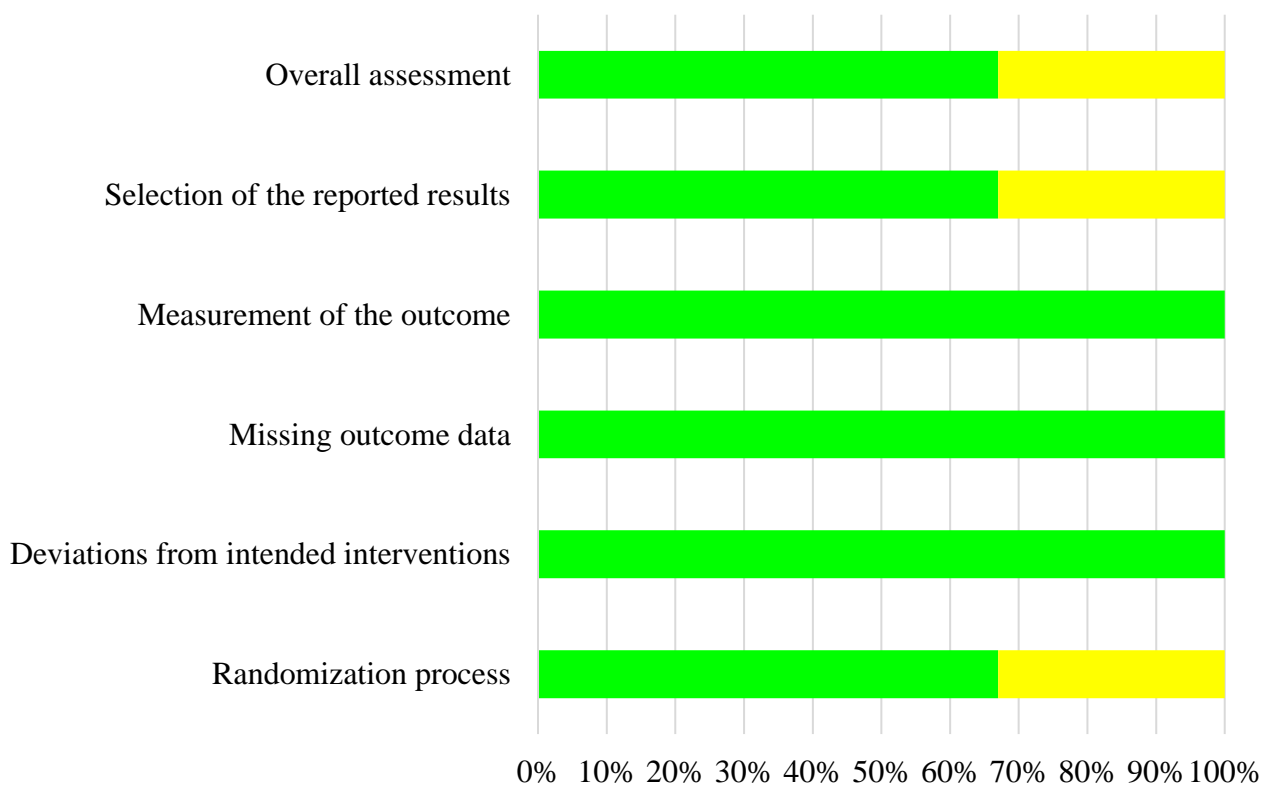

Low risk + Some concerns ? High risk -

**Supplementary Figure 17:** Forest plot and Trial Sequential Analysis representing that addition of daratumumab to backbone therapies increases the chance for all grade lymphopenia in newly diagnosed multiple myeloma

## Studies

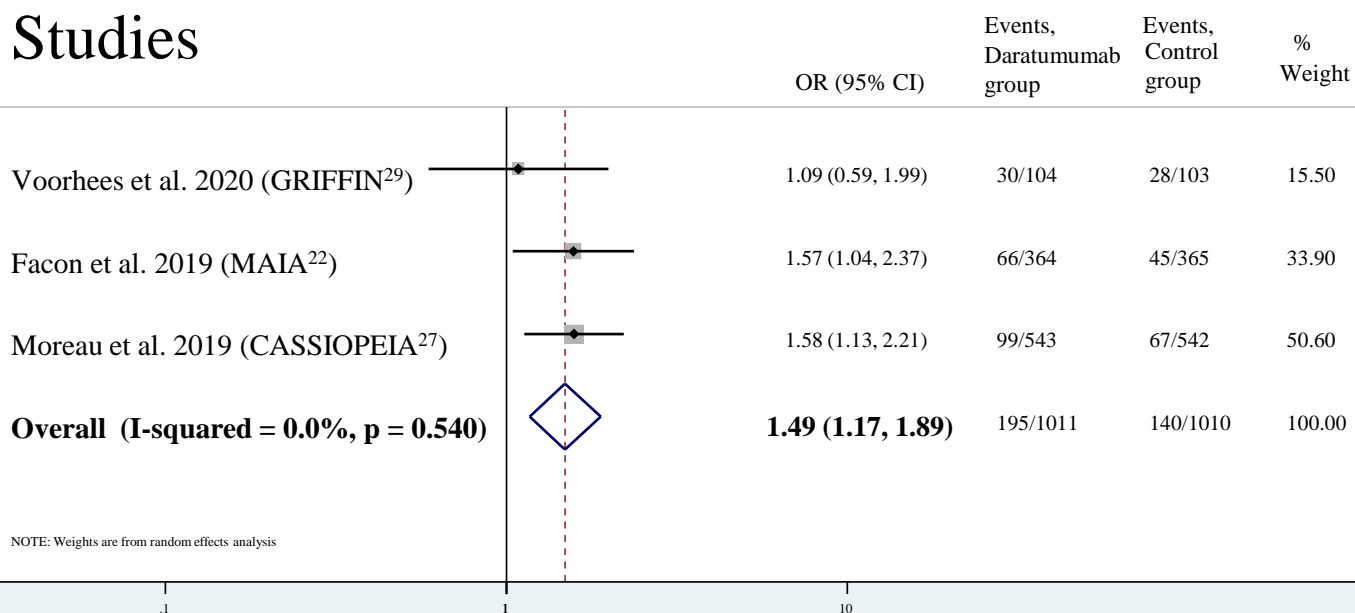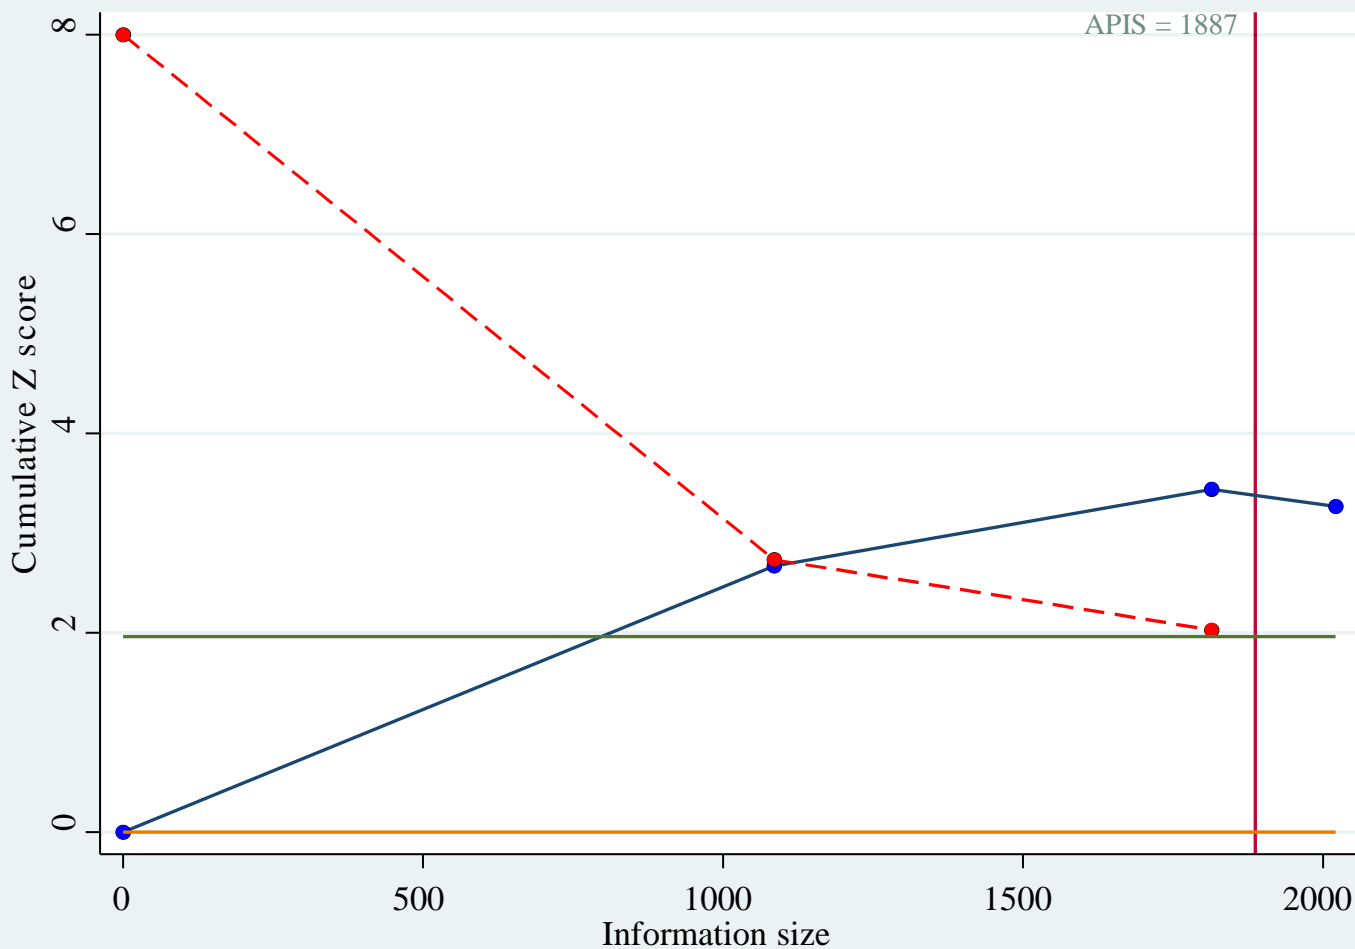

**Supplementary Figure 18:** Risk of bias assessment at study level and at domain level regarding all grade lymphopenia in newly diagnosed multiple myeloma

DVMP, daratumumab, bortezomib, melphalan, and prednisone; VMP, bortezomib, melphalan, and prednisone; DVTd, daratumumab, bortezomib, thalidomide, and dexamethasone; VTd, bortezomib, thalidomide, and dexamethasone; DRd, daratumumab, lenalidomide and dexamethasone; Rd, lenalidomide and dexamethasone

| Study                | Interventions | Randomization process | Deviations from intended interventions | Missing outcome data | Measurement of the outcome | Selection of the reported results | Overall assessment |
|----------------------|---------------|-----------------------|----------------------------------------|----------------------|----------------------------|-----------------------------------|--------------------|
| Voorhees et al. 2020 | DRVd vs RVd   | ?                     | +                                      | +                    | +                          | +                                 | ?                  |
| Moreau et al. 2019   | DVTd vs VTd   | +                     | +                                      | +                    | +                          | ?                                 | +                  |
| Facon et al. 2019    | DRd vs Rd     | +                     | +                                      | +                    | +                          | +                                 | +                  |



Low risk +    Some concerns ?    High risk -

**Supplementary Figure 19:** Forest plot and Trial Sequential Analysis representing that addition of daratumumab to backbone therapies increases the chance for grade 3-4 lymphopenia in newly diagnosed multiple myeloma

## Studies

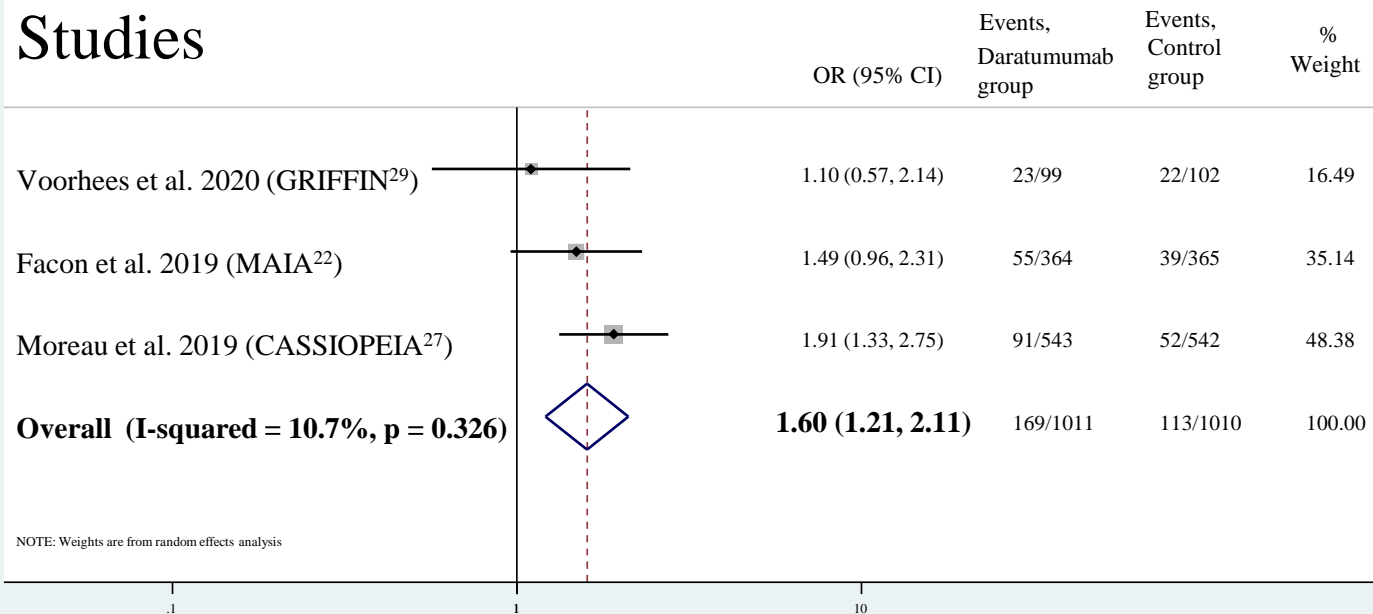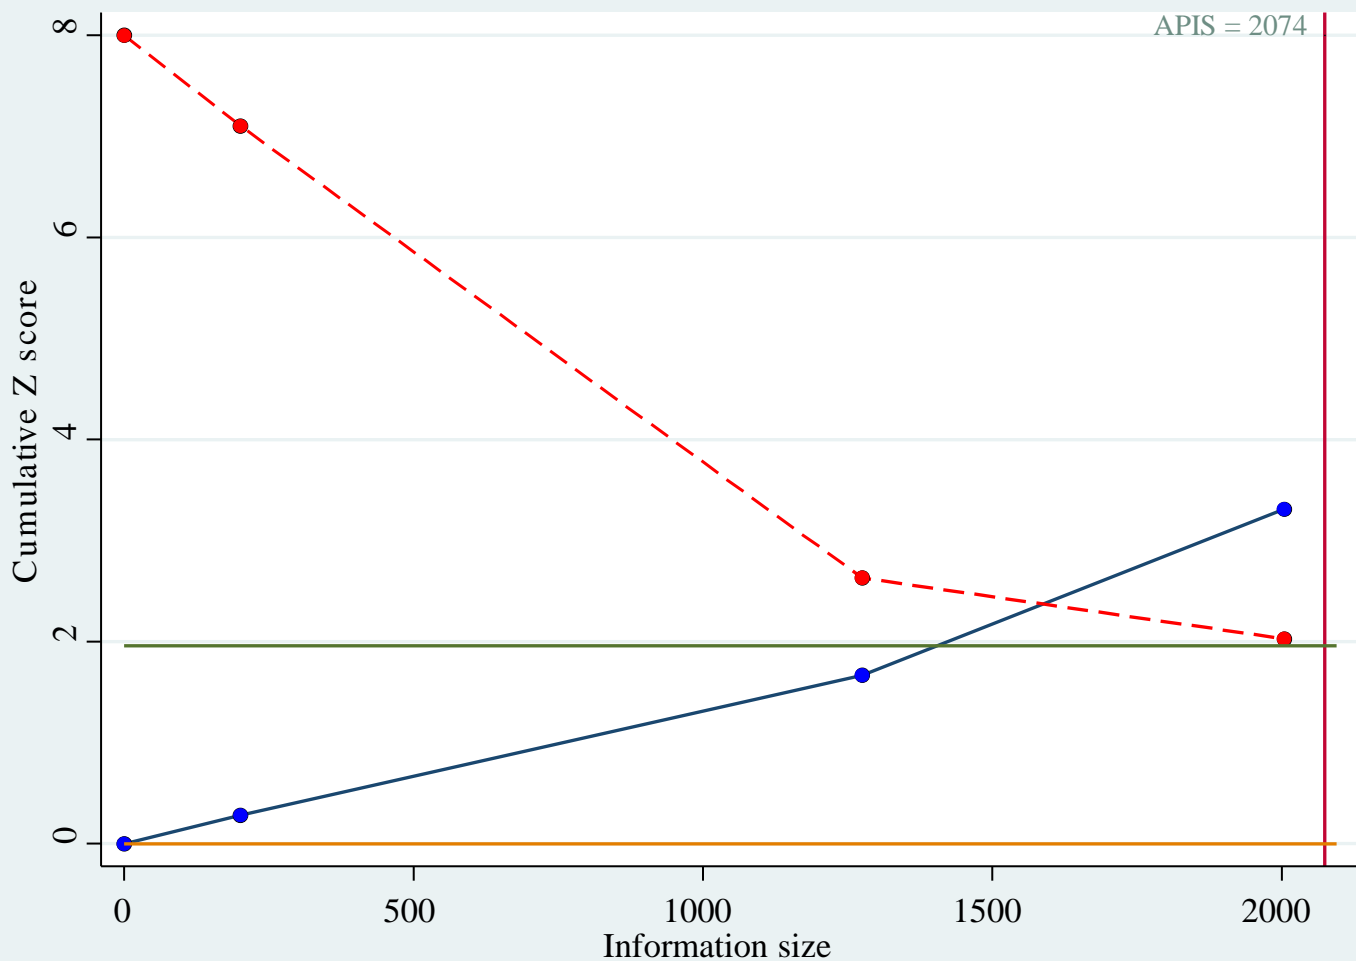

**Supplementary Figure 20:** Risk of bias assessment at study level and at domain level regarding grade 3-4 lymphopenia in newly diagnosed multiple myeloma

DVMP, daratumumab, bortezomib, melphalan, and prednisone; VMP, bortezomib, melphalan, and prednisone; DVTd, daratumumab, bortezomib, thalidomide, and dexamethasone; VTd, bortezomib, thalidomide, and dexamethasone; DRd, daratumumab, lenalidomide and dexamethasone; Rd, lenalidomide and dexamethasone

| Study                | Interventions | Randomization process | Deviations from intended interventions | Missing outcome data | Measurement of the outcome | Selection of the reported results | Overall assessment |
|----------------------|---------------|-----------------------|----------------------------------------|----------------------|----------------------------|-----------------------------------|--------------------|
| Voorhees et al. 2020 | DRVd vs RVd   | ?                     | +                                      | +                    | +                          | +                                 | ?                  |
| Moreau et al. 2019   | DVTd vs VTd   | +                     | +                                      | +                    | +                          | ?                                 | +                  |
| Facon et al. 2019    | DRd vs Rd     | +                     | +                                      | +                    | +                          | +                                 | +                  |

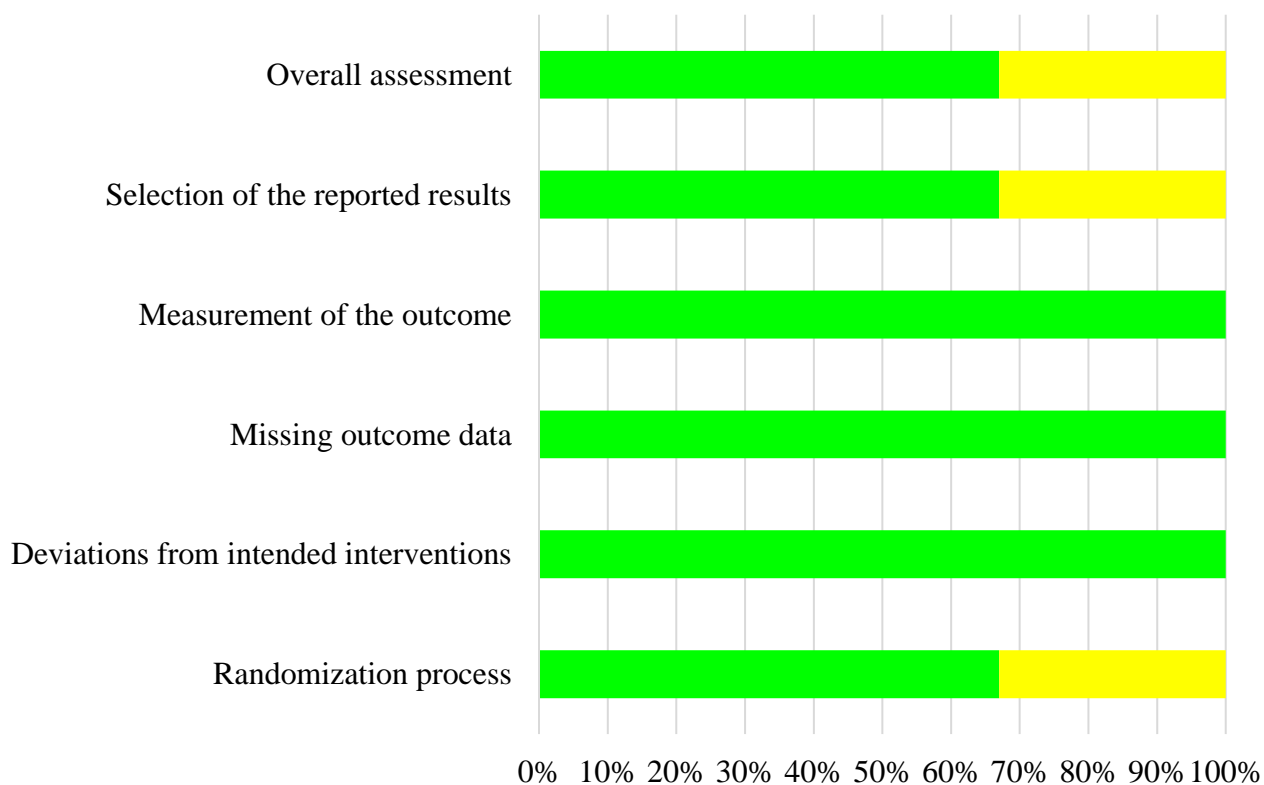

Low risk +    Some concerns ?    High risk -



**Supplementary Figure 21:** Forest plot and Trial Sequential Analysis representing that addition of daratumumab to backbone therapies increases the chance for all grade neutropenia in newly diagnosed multiple myeloma

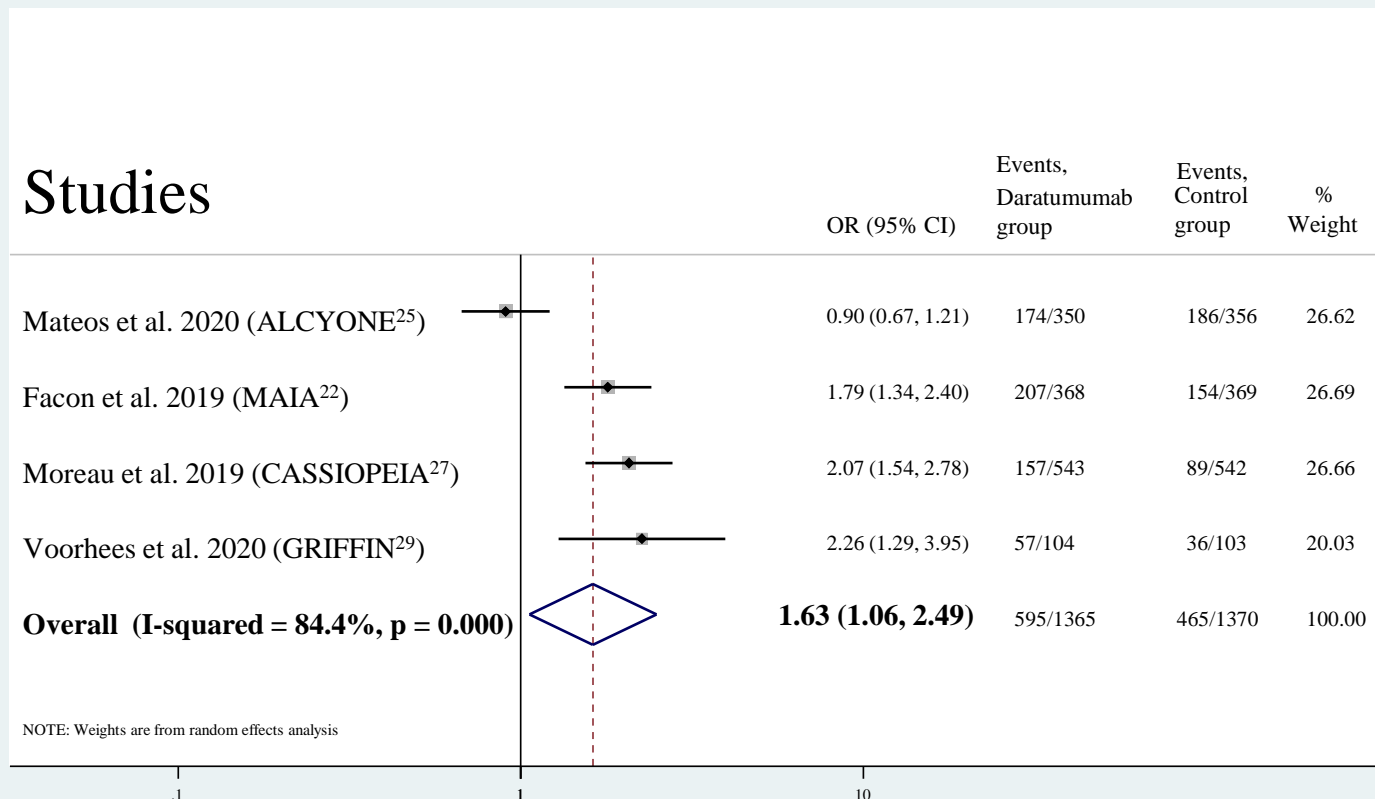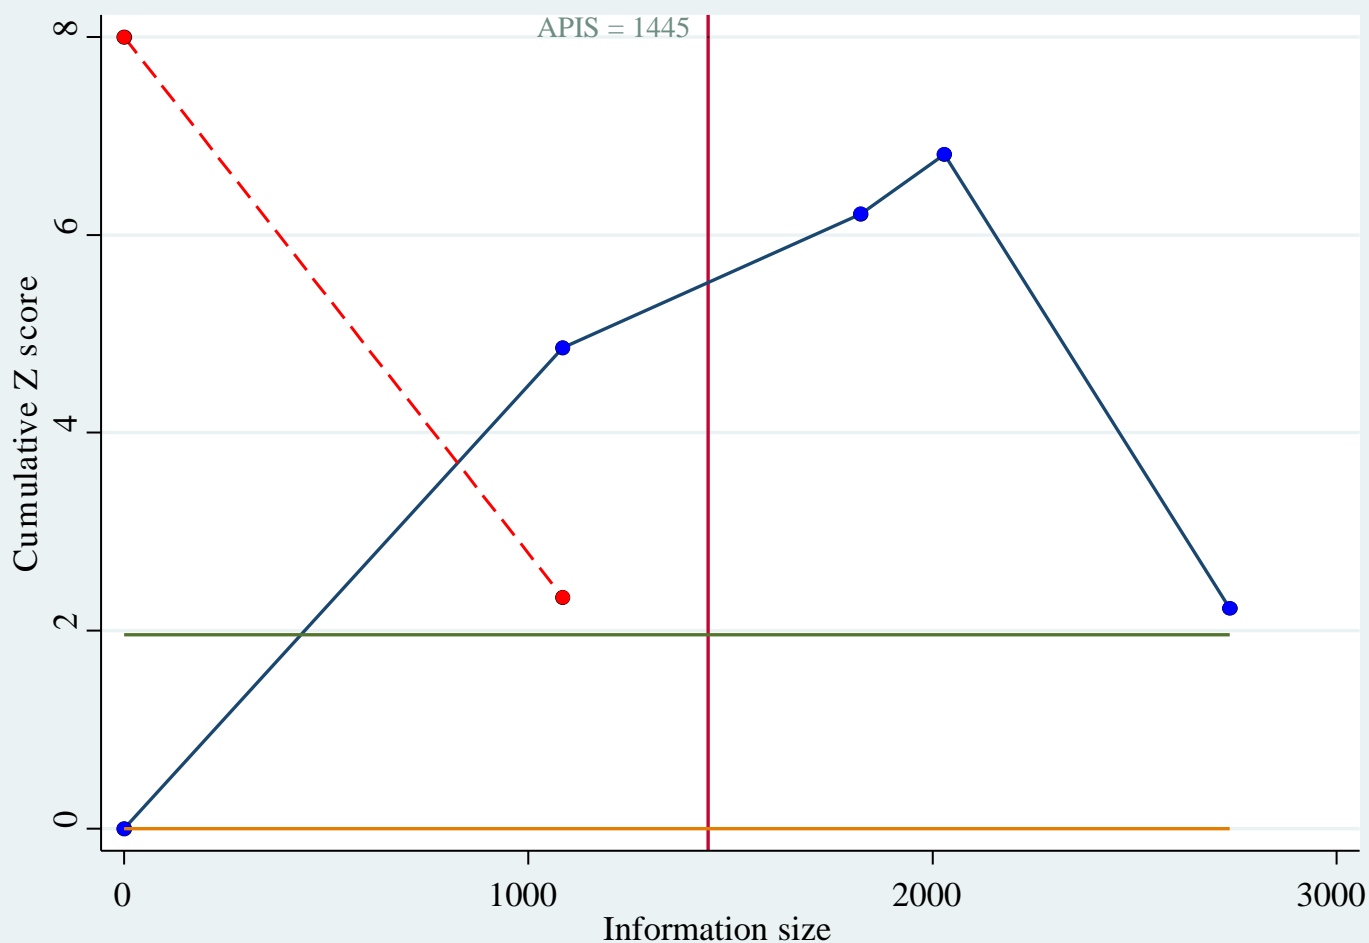

**Supplementary Figure 22: Risk of bias assessment at study level and at domain level all grade neutropenia in newly diagnosed multiple myeloma**

DRVd, daratumumab, bortezomib, lenalidomide and dexamethasone; RVd, bortezomib, lenalidomide and dexamethasone; DVMP, daratumumab, bortezomib, melphalan, and prednisone; VMP, bortezomib, melphalan, and prednisone; DVTd, daratumumab, bortezomib, thalidomide, and dexamethasone; VTd, bortezomib, thalidomide, and dexamethasone; DRd, daratumumab, lenalidomide and dexamethasone; Rd, lenalidomide and dexamethasone

| Study                | Interventions | Randomization process | Deviations from intended interventions | Missing outcome data | Measurement of the outcome | Selection of the reported results | Overall assessment |
|----------------------|---------------|-----------------------|----------------------------------------|----------------------|----------------------------|-----------------------------------|--------------------|
| Voorhees et al. 2020 | DRVd vs RVd   | ?                     | +                                      | +                    | +                          | +                                 | ?                  |
| Mateos et al. 2020   | DVMP vs VMP   | +                     | +                                      | +                    | +                          | +                                 | +                  |
| Moreau et al. 2019   | DVTd vs VTd   | +                     | +                                      | +                    | +                          | ?                                 | +                  |
| Facon et al. 2019    | DRd vs Rd     | +                     | +                                      | +                    | +                          | +                                 | +                  |



**Supplementary Figure 23:** Forest plot and Trial Sequential Analysis representing that addition of daratumumab to backbone therapies increases the chance for grade 3-4 neutropenia in newly diagnosed multiple myeloma

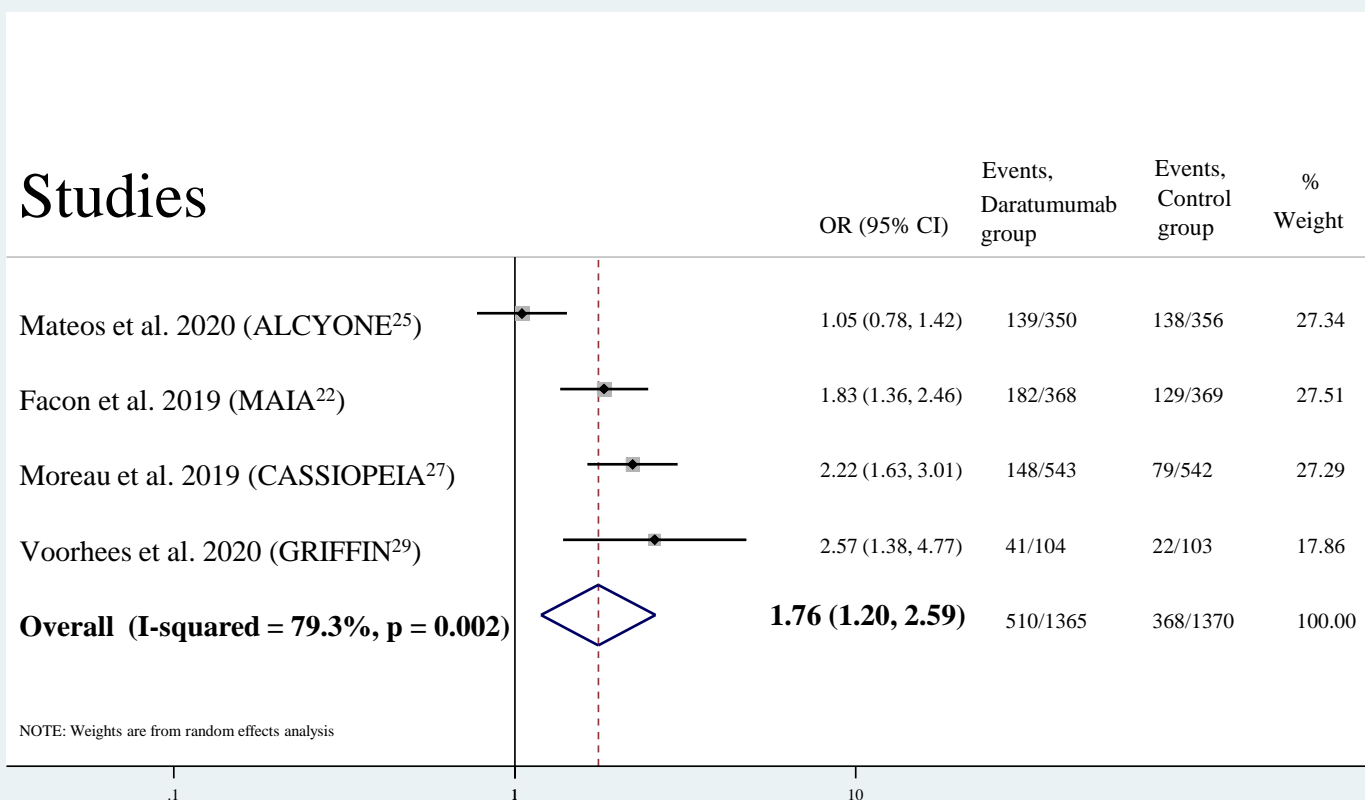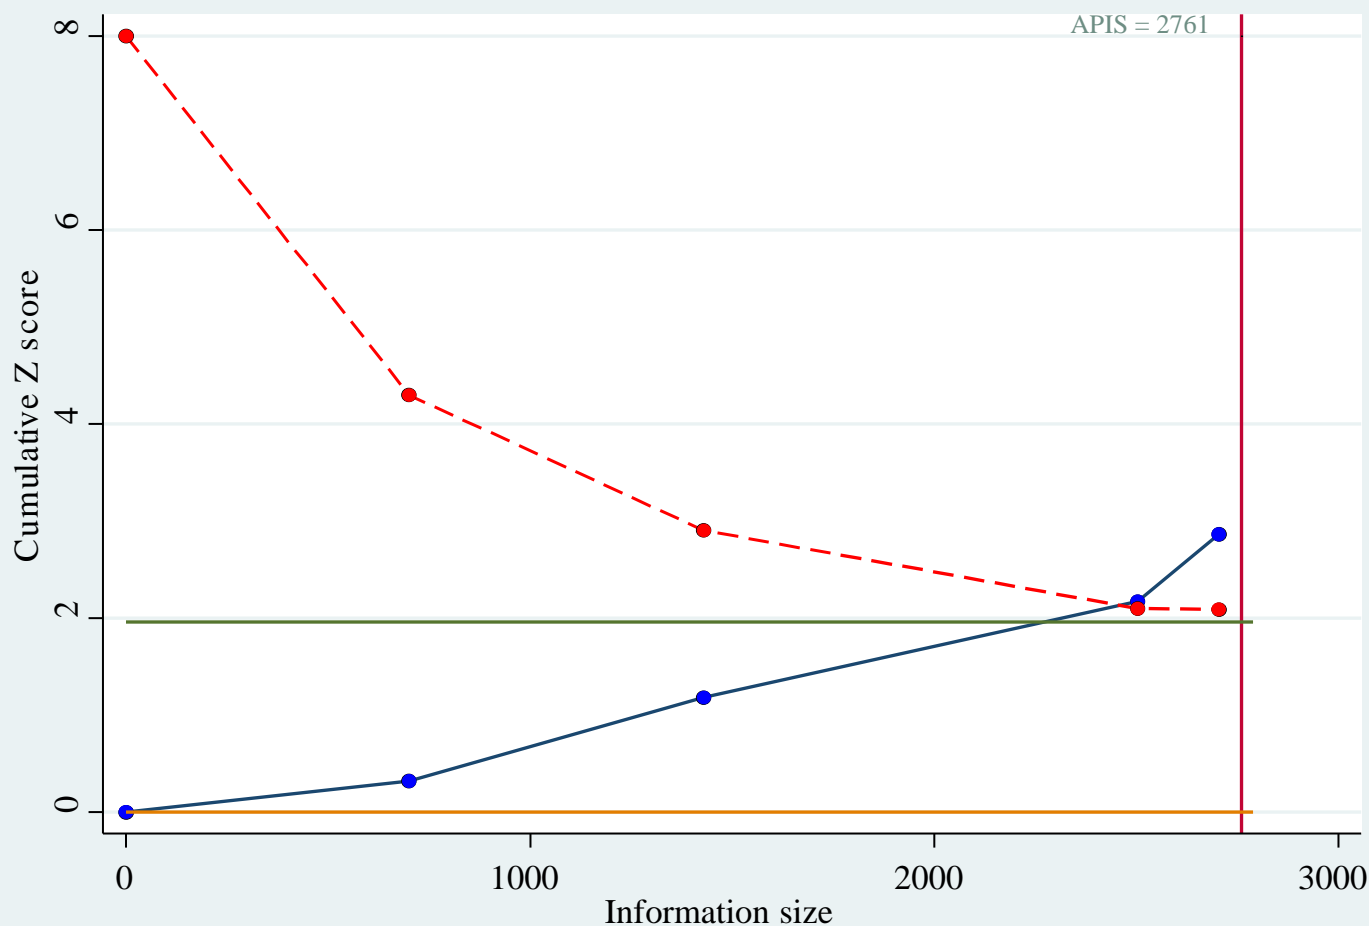

**Supplementary Figure 24:** Risk of bias assessment at study level and at domain level grade 3-4 neutropenia in newly diagnosed multiple myeloma

DRVd, daratumumab, bortezomib, lenalidomide and dexamethasone; RVd, bortezomib, lenalidomide and dexamethasone; DVMP, daratumumab, bortezomib, melphalan, and prednisone; VMP, bortezomib, melphalan, and prednisone; DVTd, daratumumab, bortezomib, thalidomide, and dexamethasone; VTd, bortezomib, thalidomide, and dexamethasone; DRd, daratumumab, lenalidomide and dexamethasone; Rd, lenalidomide and dexamethasone

| Study                | Interventions | Randomization process | Deviations from intended interventions | Missing outcome data | Measurement of the outcome | Selection of the reported results | Overall assessment |
|----------------------|---------------|-----------------------|----------------------------------------|----------------------|----------------------------|-----------------------------------|--------------------|
| Voorhees et al. 2020 | DRVd vs RVd   | ?                     | +                                      | +                    | +                          | +                                 | ?                  |
| Mateos et al. 2020   | DVMP vs VMP   | +                     | +                                      | +                    | +                          | +                                 | +                  |
| Moreau et al. 2019   | DVTd vs VTd   | +                     | +                                      | +                    | +                          | ?                                 | +                  |
| Facon et al. 2019    | DRd vs Rd     | +                     | +                                      | +                    | +                          | +                                 | +                  |

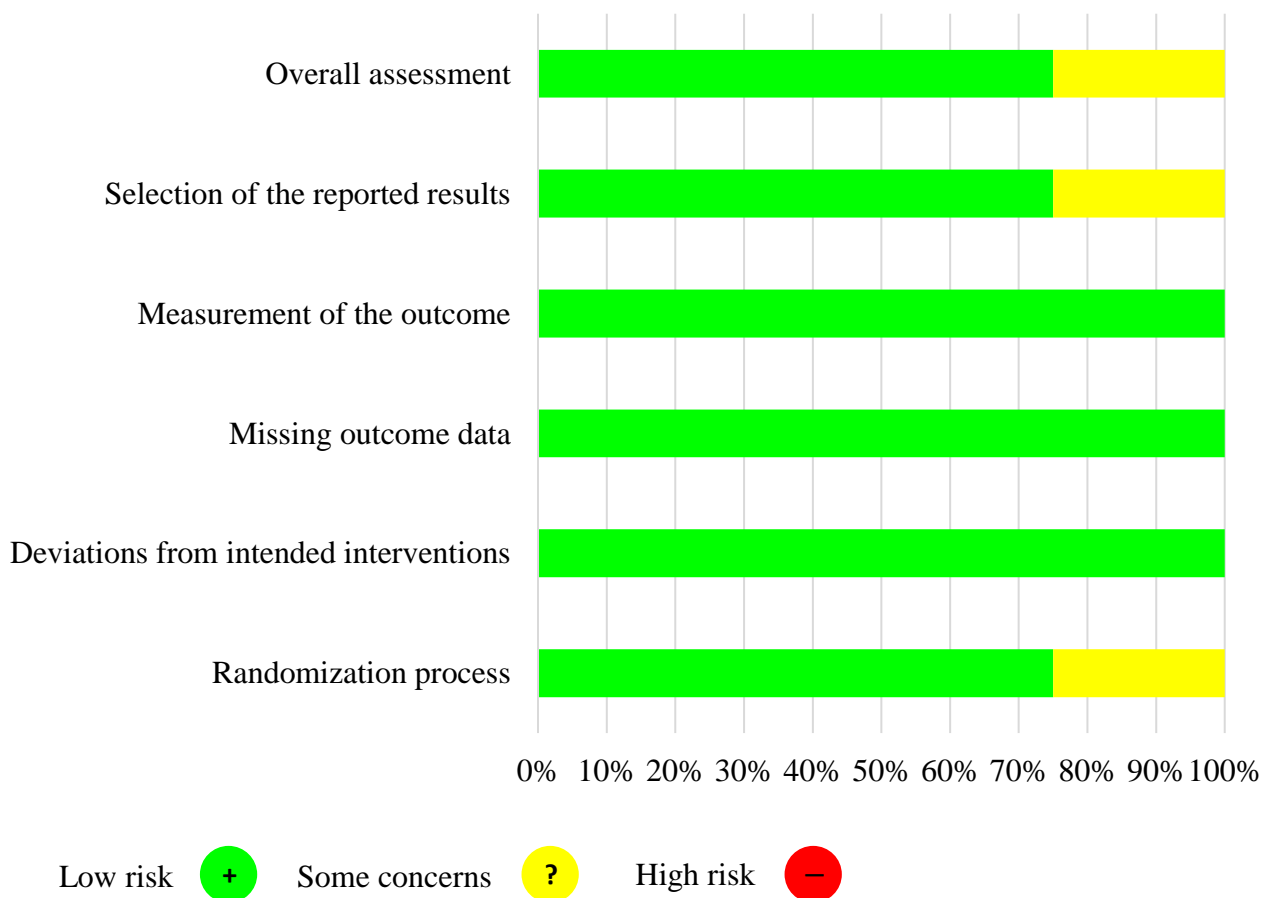

**Supplementary Figure 25:** Forest plot and Trial Sequential Analysis representing that addition of daratumumab to backbone therapies does not increase the chance for all grade anaemia in newly diagnosed multiple myeloma

## Studies

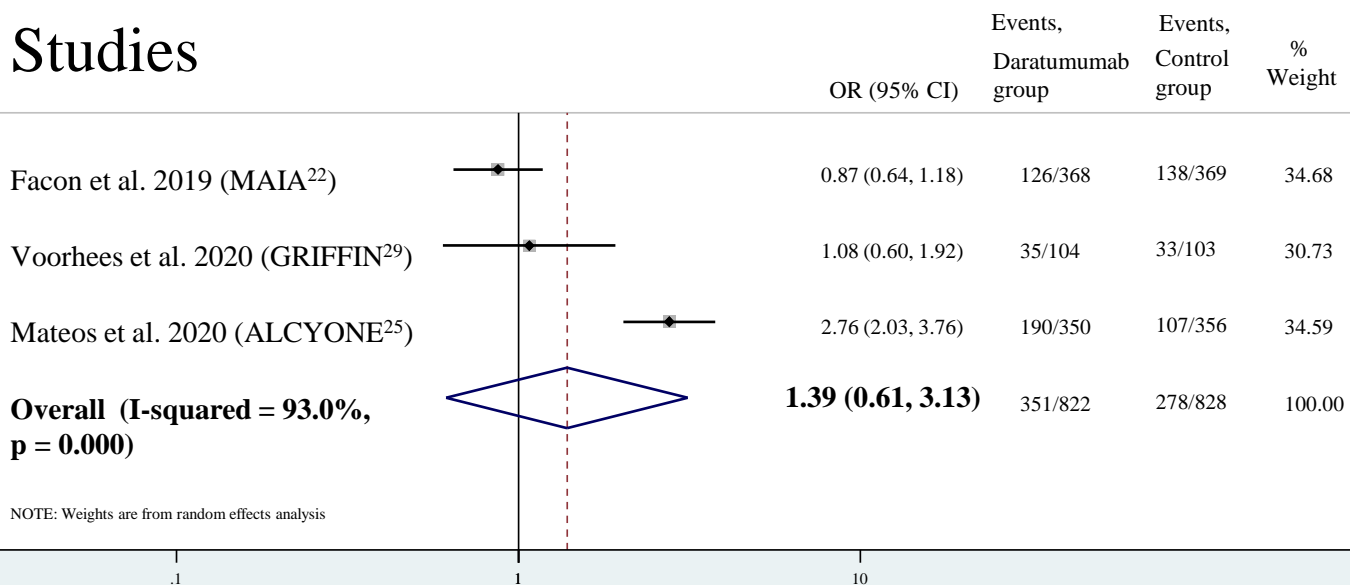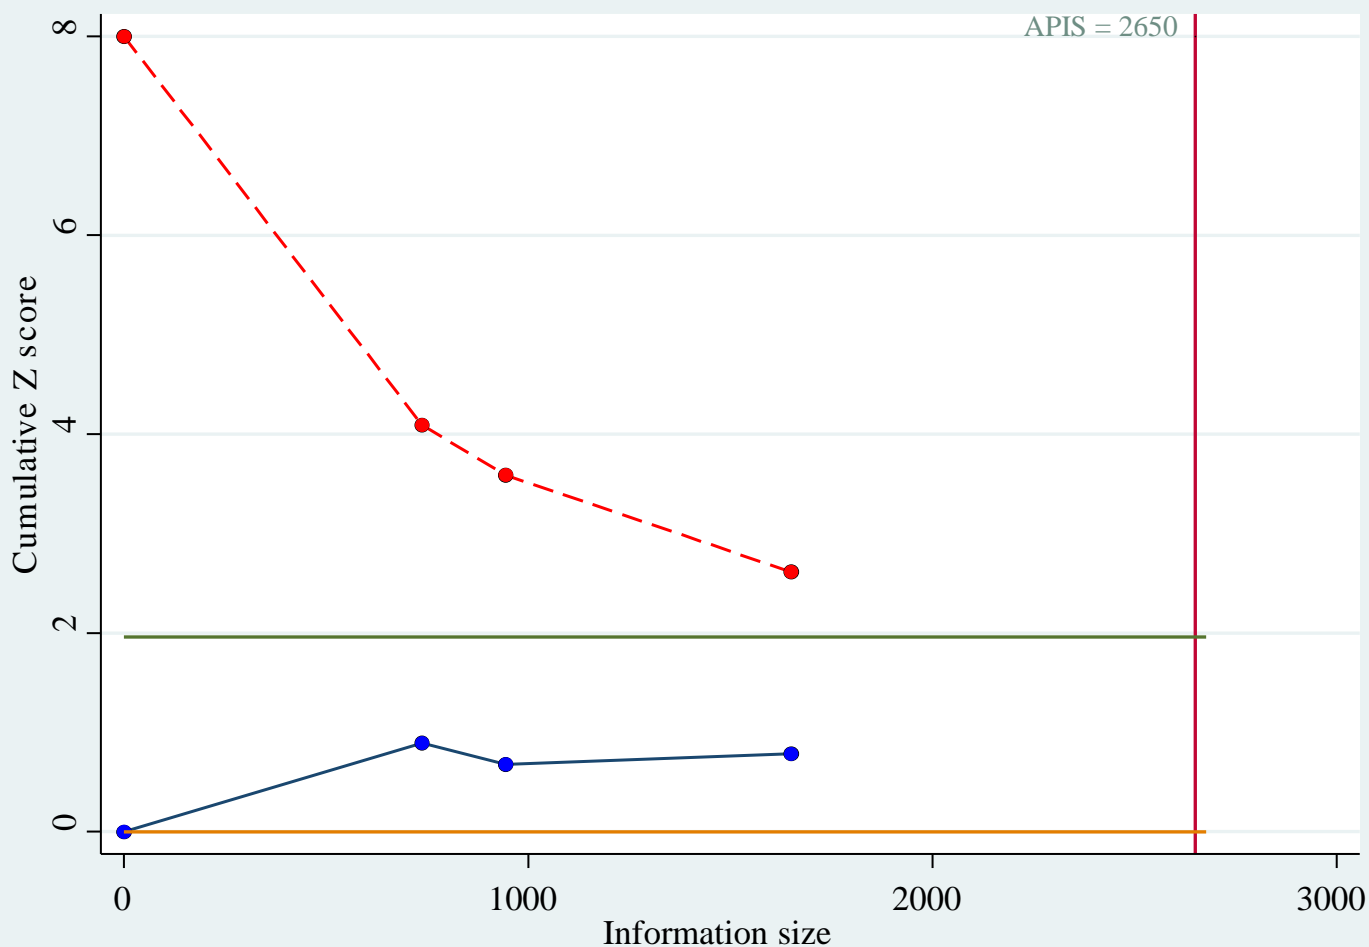

**Supplementary Figure 26:** Risk of bias assessment at study level and at domain level regarding all grade anaemia in newly diagnosed multiple myeloma

DRVd, daratumumab, bortezomib, lenalidomide and dexamethasone; RVd, bortezomib, lenalidomide and dexamethasone; DVMP, daratumumab, bortezomib, melphalan, and prednisone; VMP, bortezomib, melphalan, and prednisone; DRd, daratumumab, lenalidomide and dexamethasone; Rd, lenalidomide and dexamethasone

| Study                | Interventions | Randomization process | Deviations from intended interventions | Missing outcome data | Measurement of the outcome | Selection of the reported results | Overall assessment |
|----------------------|---------------|-----------------------|----------------------------------------|----------------------|----------------------------|-----------------------------------|--------------------|
| Voorhees et al. 2020 | DRVd vs RVd   | ?                     | +                                      | +                    | +                          | +                                 | ?                  |
| Mateos et al. 2020   | DVMP vs VMP   | +                     | +                                      | +                    | +                          | +                                 | +                  |
| Facon et al. 2019    | DRd vs Rd     | +                     | +                                      | +                    | +                          | +                                 | +                  |

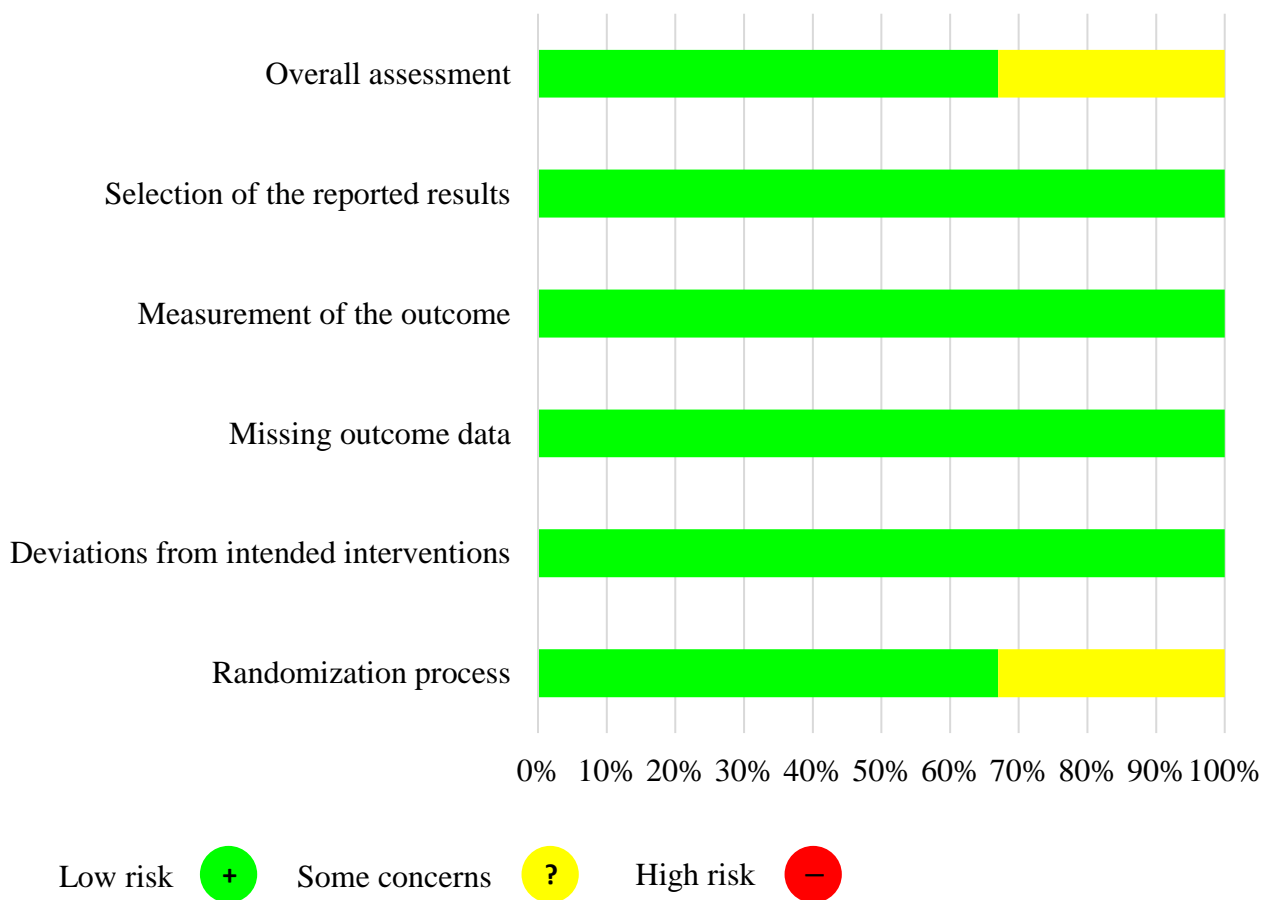

**Supplementary Figure 27:** Forest plot and Trial Sequential Analysis representing that addition of daratumumab to backbone therapies does not increase the chance for grade 3-4 anaemia in newly diagnosed multiple myeloma

## Studies

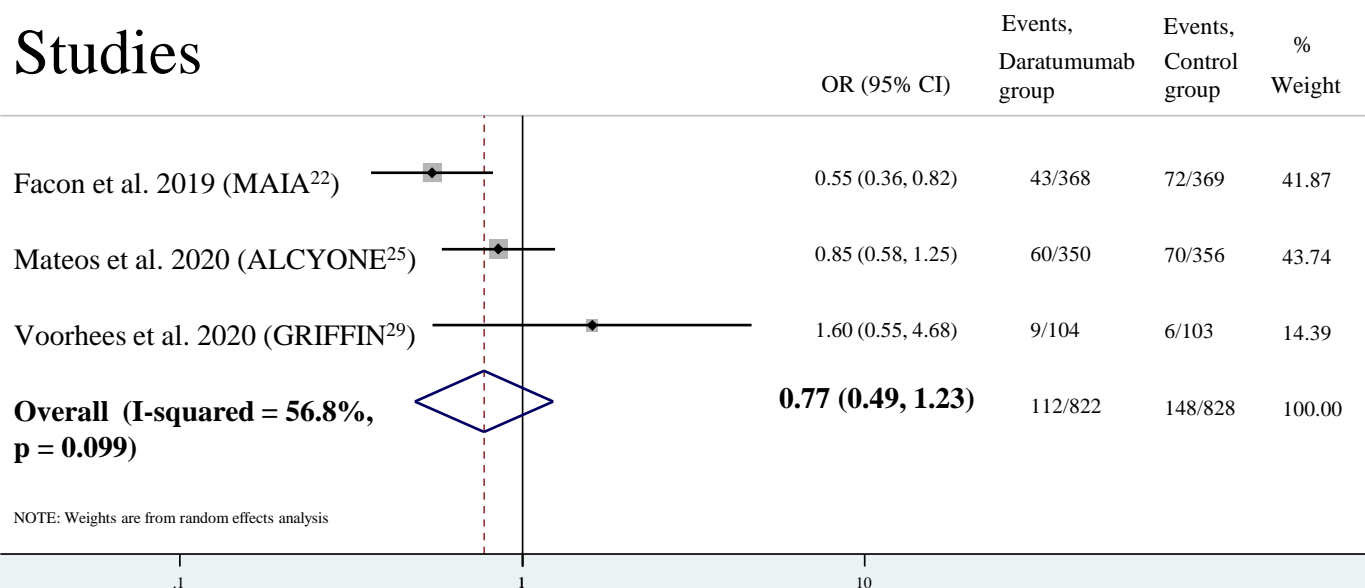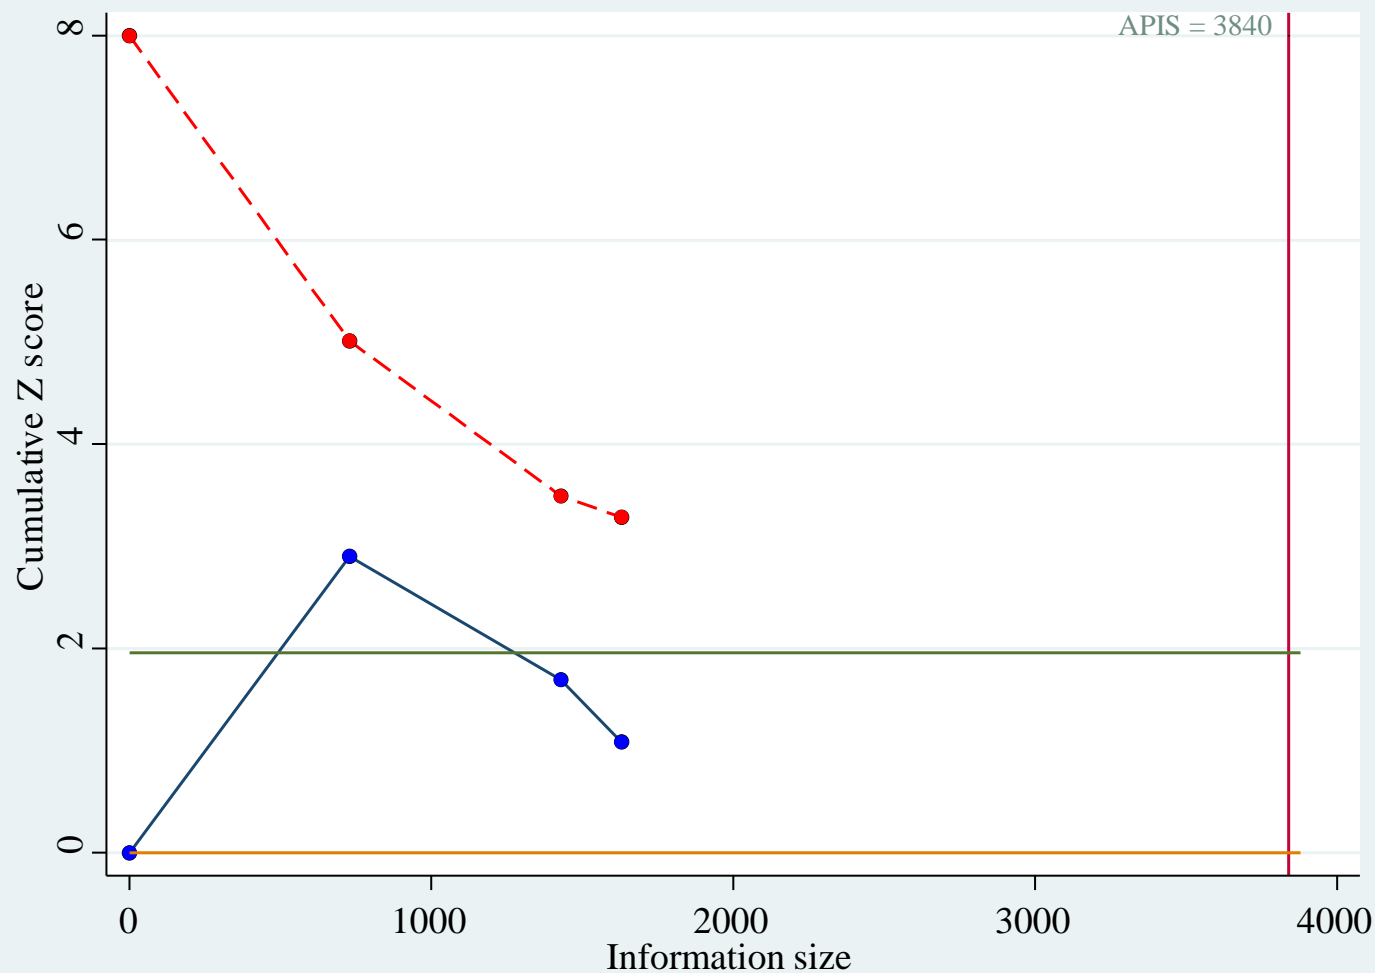

**Supplementary Figure 28:** Risk of bias assessment at study level and at domain level regarding all grade anaemia in newly diagnosed multiple myeloma

DRVd, daratumumab, bortezomib, lenalidomide and dexamethasone; RVd, bortezomib, lenalidomide and dexamethasone; DVMP, daratumumab, bortezomib, melphalan, and prednisone; VMP, bortezomib, melphalan, and prednisone; DRd, daratumumab, lenalidomide and dexamethasone; Rd, lenalidomide and dexamethasone

| Study                | Interventions | Randomization process | Deviations from intended interventions | Missing outcome data | Measurement of the outcome | Selection of the reported results | Overall assessment |
|----------------------|---------------|-----------------------|----------------------------------------|----------------------|----------------------------|-----------------------------------|--------------------|
| Voorhees et al. 2020 | DRVd vs RVd   | ?                     | +                                      | +                    | +                          | +                                 | ?                  |
| Mateos et al. 2020   | DVMP vs VMP   | +                     | +                                      | +                    | +                          | +                                 | +                  |
| Facon et al. 2019    | DRd vs Rd     | +                     | +                                      | +                    | +                          | +                                 | +                  |





**Supplementary Figure 29:** Forest plot and Trial Sequential Analysis representing that addition of daratumumab to backbone therapies is associated with decreased chance for all grade peripheral neuropathy in newly diagnosed multiple myeloma

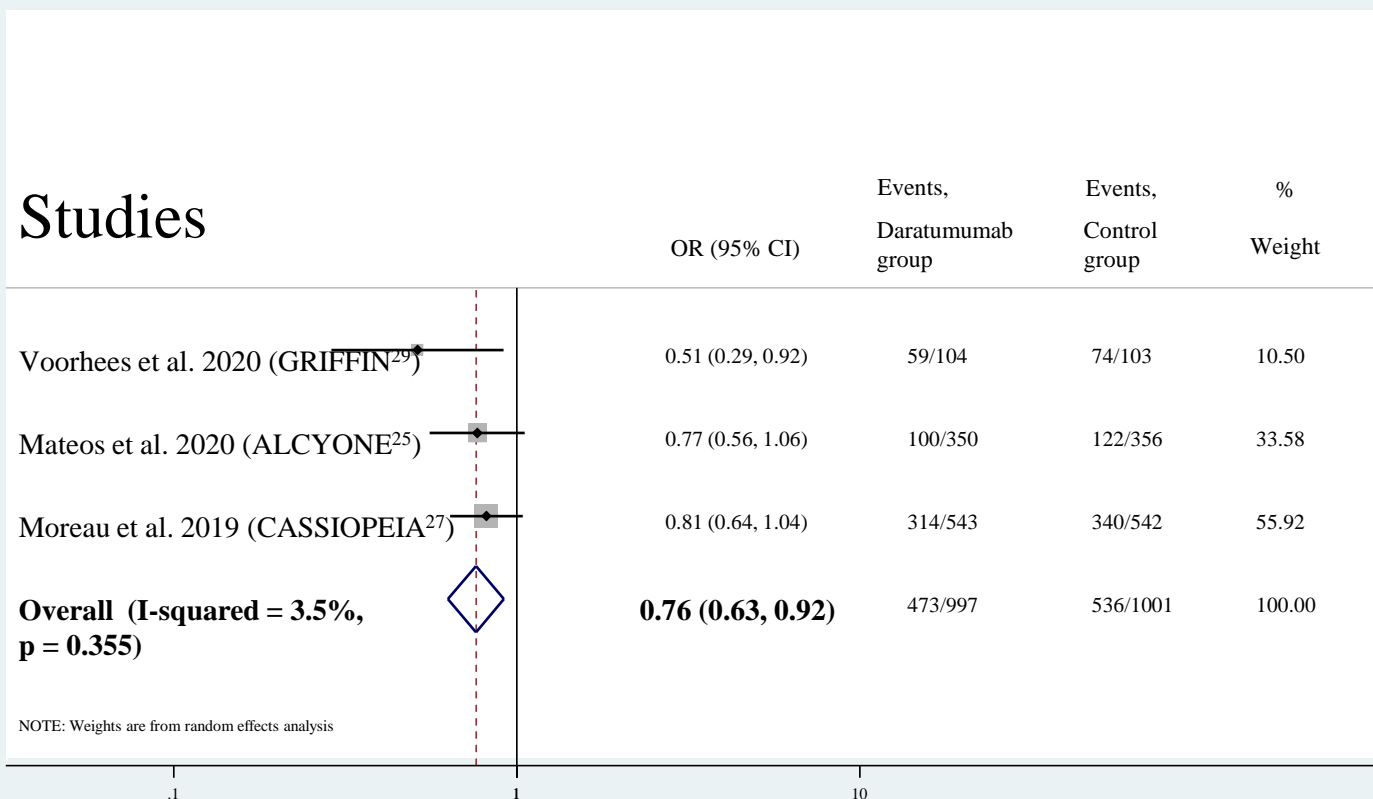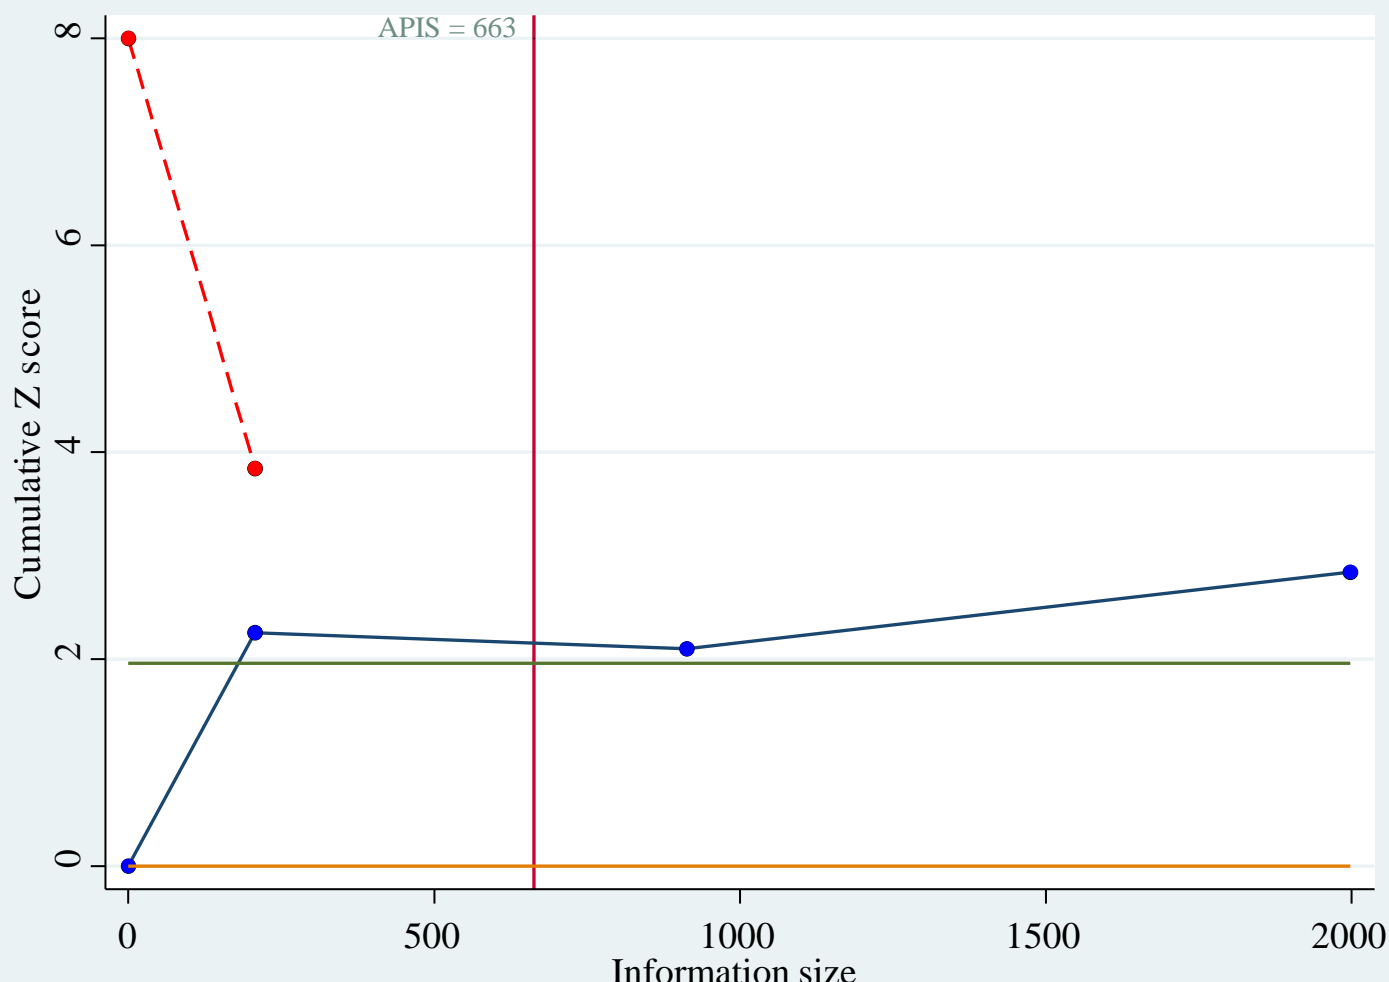

**Supplementary Figure 30: Risk of bias assessment at study level and at domain level regarding all grade peripheral neuropathy in newly diagnosed multiple myeloma**

DRVd, daratumumab, bortezomib, lenalidomide and dexamethasone; RVd, bortezomib, lenalidomide and dexamethasone; DVMP, daratumumab, bortezomib, melphalan, and prednisone; VMP, bortezomib, melphalan, and prednisone; DVTd, daratumumab, bortezomib, thalidomide, and dexamethasone; VTd, bortezomib, thalidomide, and dexamethasone

| Study                | Interventions | Randomization process | Deviations from intended interventions | Missing outcome data | Measurement of the outcome | Selection of the reported results | Overall assessment |
|----------------------|---------------|-----------------------|----------------------------------------|----------------------|----------------------------|-----------------------------------|--------------------|
| Voorhees et al. 2020 | DRVd vs RVd   | ?                     | +                                      | +                    | +                          | +                                 | ?                  |
| Mateos et al. 2020   | DVMP vs VMP   | +                     | +                                      | +                    | +                          | +                                 | +                  |
| Moreau et al. 2019   | DVTd vs VTd   | +                     | +                                      | +                    | +                          | ?                                 | +                  |

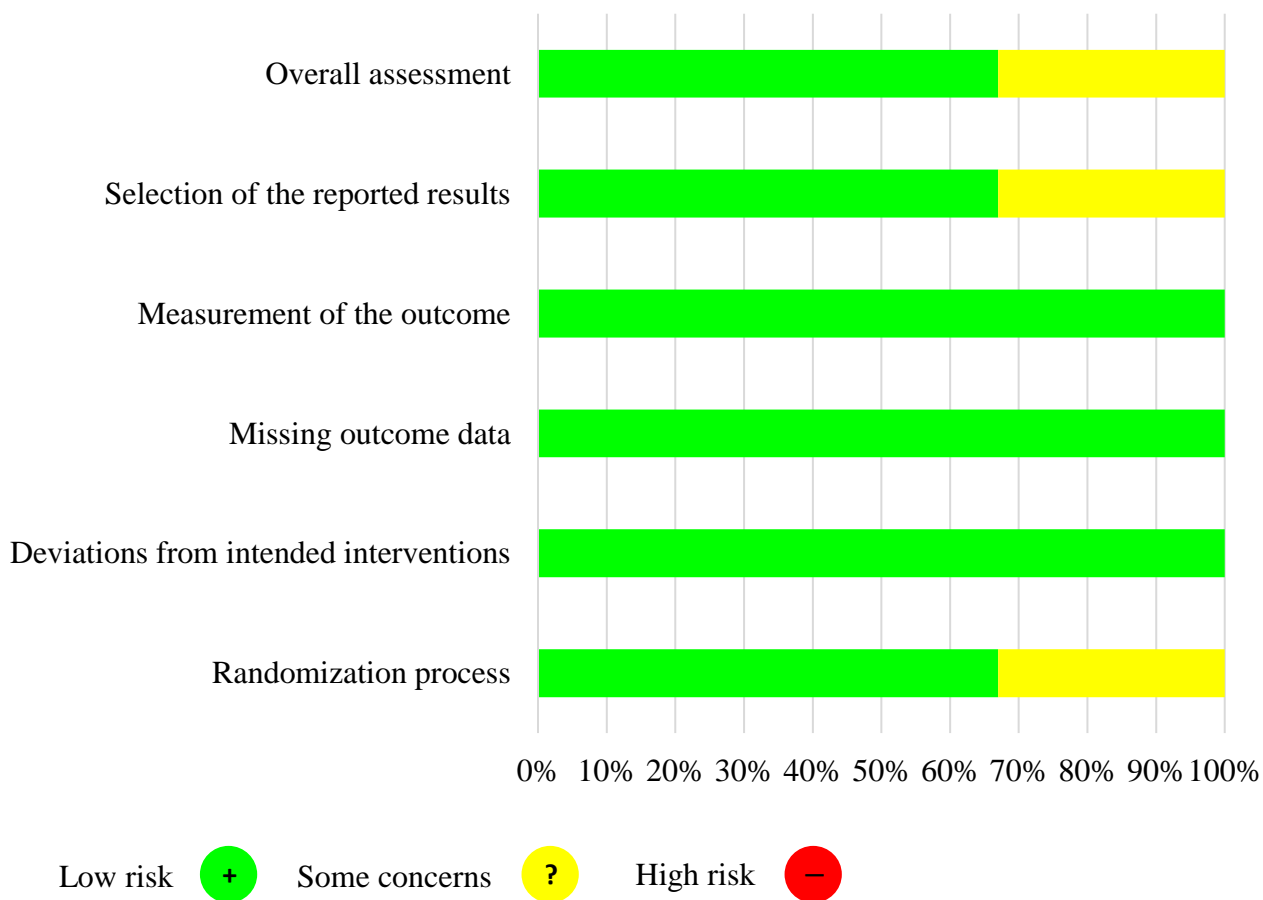

**Supplementary Figure 31:** Forest plot and Trial Sequential Analysis representing that addition of daratumumab to backbone therapies does not increase the chance for grade 3-4 peripheral neuropathy in newly diagnosed multiple myeloma

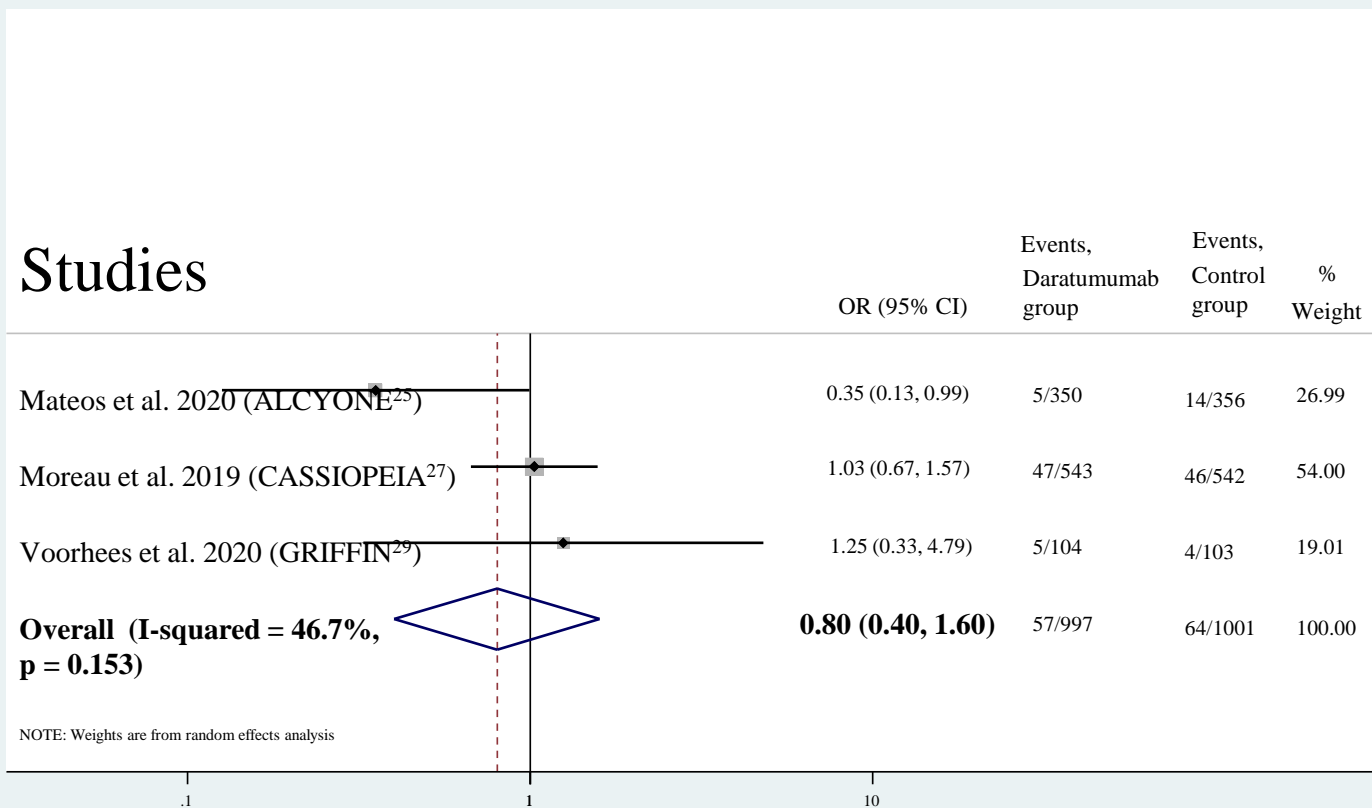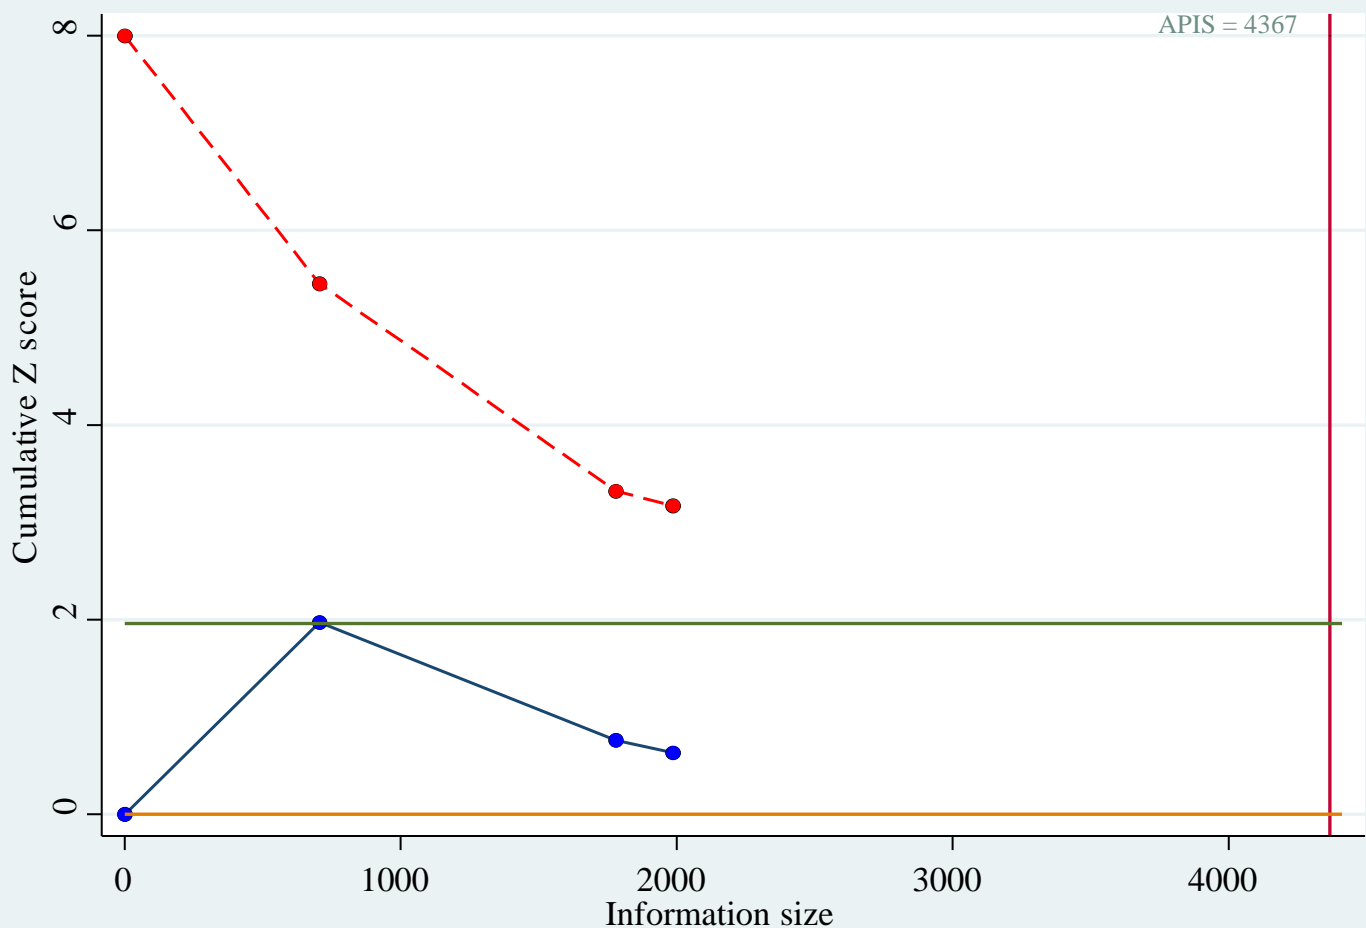

**Supplementary Figure 32: Risk of bias assessment at study level and at domain level regarding grade 3-4 peripheral neuropathy in newly diagnosed multiple myeloma**

DRVd, daratumumab, bortezomib, lenalidomide and dexamethasone; RVd, bortezomib, lenalidomide and dexamethasone; DVMP, daratumumab, bortezomib, melphalan, and prednisone; VMP, bortezomib, melphalan, and prednisone; DVTd, daratumumab, bortezomib, thalidomide, and dexamethasone; VTd, bortezomib, thalidomide, and dexamethasone

| Study                | Interventions | Randomization process | Deviations from intended interventions | Missing outcome data | Measurement of the outcome | Selection of the reported results | Overall assessment |
|----------------------|---------------|-----------------------|----------------------------------------|----------------------|----------------------------|-----------------------------------|--------------------|
| Voorhees et al. 2020 | DRVd vs RVd   | ?                     | +                                      | +                    | +                          | +                                 | ?                  |
| Mateos et al. 2020   | DVMP vs VMP   | +                     | +                                      | +                    | +                          | +                                 | +                  |
| Moreau et al. 2019   | DVTd vs VTd   | +                     | +                                      | +                    | +                          | ?                                 | +                  |



**Supplementary Figure 33:** Forest plot representing that addition of daratumumab to backbone therapies is not associated with increased chance for second primary cancer in newly diagnosed multiple myeloma. Trial Sequential Analysis could not be carried out due to low event number.

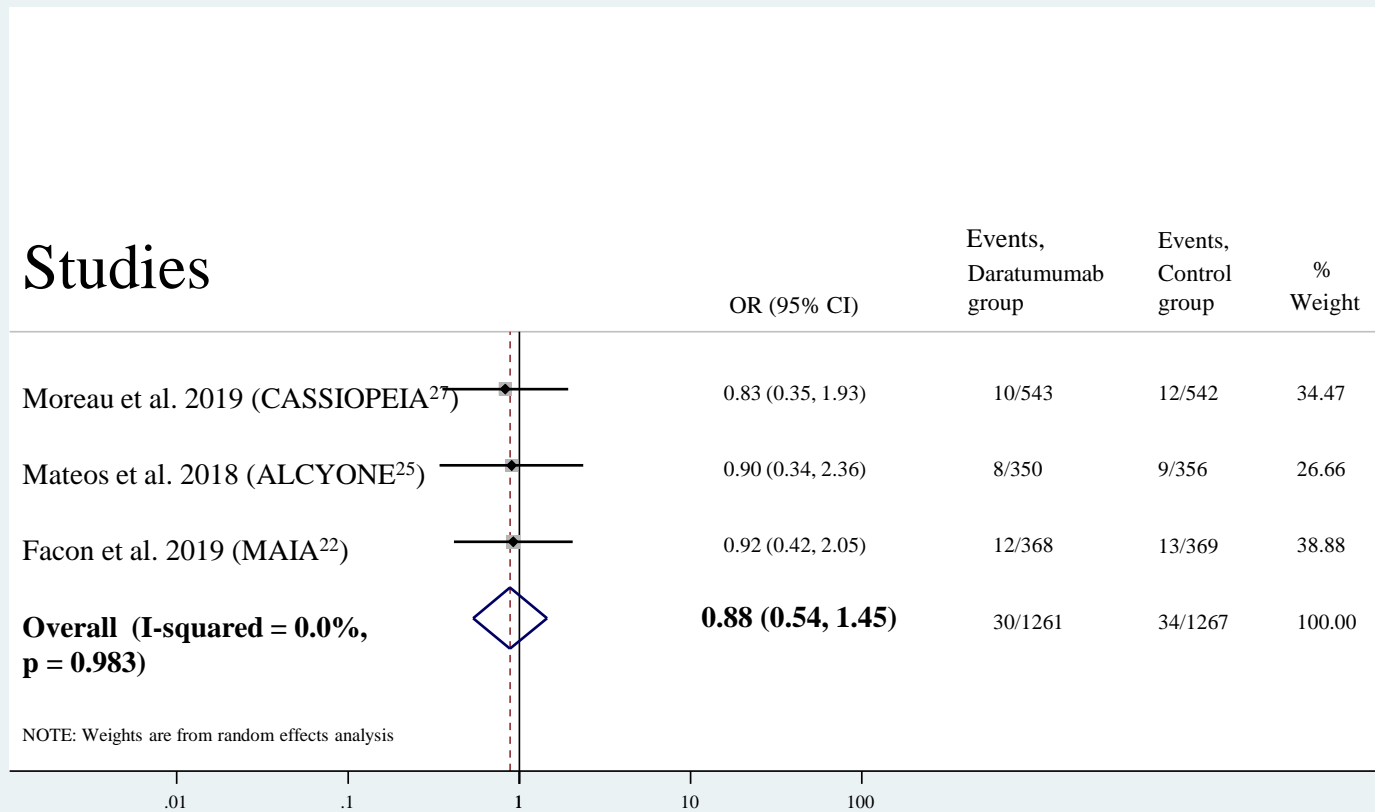

**Supplementary Figure 34:** Risk of bias assessment at study level and at domain level regarding second primary cancer in newly diagnosed multiple myeloma

DVMP, daratumumab, bortezomib, melphalan, and prednisone; VMP, bortezomib, melphalan, and prednisone; DVTd, daratumumab, bortezomib, thalidomide, and dexamethasone; VTd, bortezomib, thalidomide, and dexamethasone; DRd, daratumumab, lenalidomide and dexamethasone; Rd, lenalidomide and dexamethasone

| Study              | Interventions | Randomization process | Deviations from intended interventions | Missing outcome data | Measurement of the outcome | Selection of the reported results | Overall assessment |
|--------------------|---------------|-----------------------|----------------------------------------|----------------------|----------------------------|-----------------------------------|--------------------|
| Mateos et al. 2020 | DVMP vs VMP   | +                     | +                                      | +                    | +                          | +                                 | +                  |
| Moreau et al. 2019 | DVTd vs VTd   | +                     | +                                      | +                    | +                          | ?                                 | +                  |
| Facon et al. 2019  | DRd vs Rd     | +                     | +                                      | +                    | +                          | +                                 | +                  |

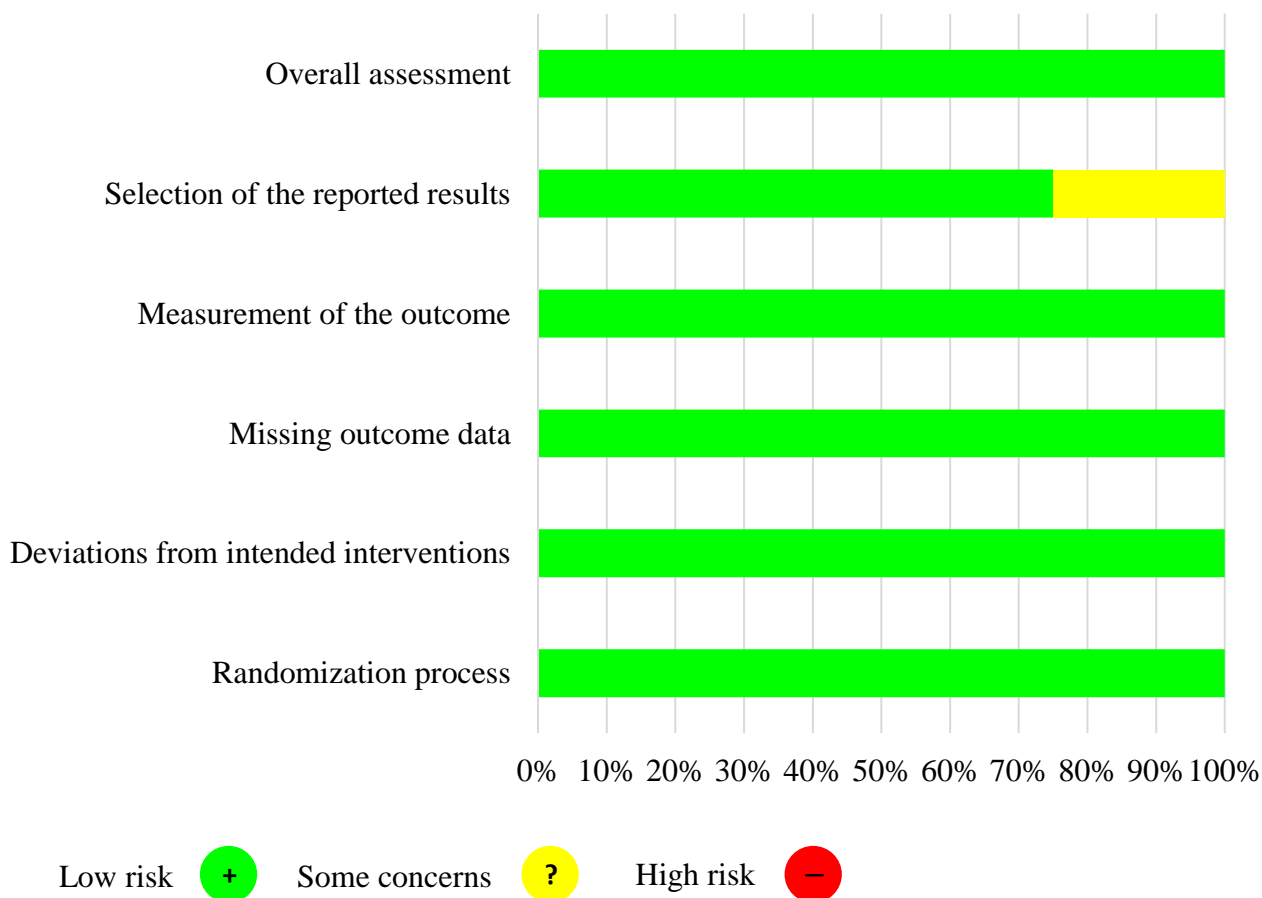

**Supplementary Figure 35:** Forest plot and Trial Sequential Analysis representing that addition of daratumumab to backbone therapies increases the chance for achieving minimal residual disease negativity in relapsed/refractory multiple myeloma

## Studies

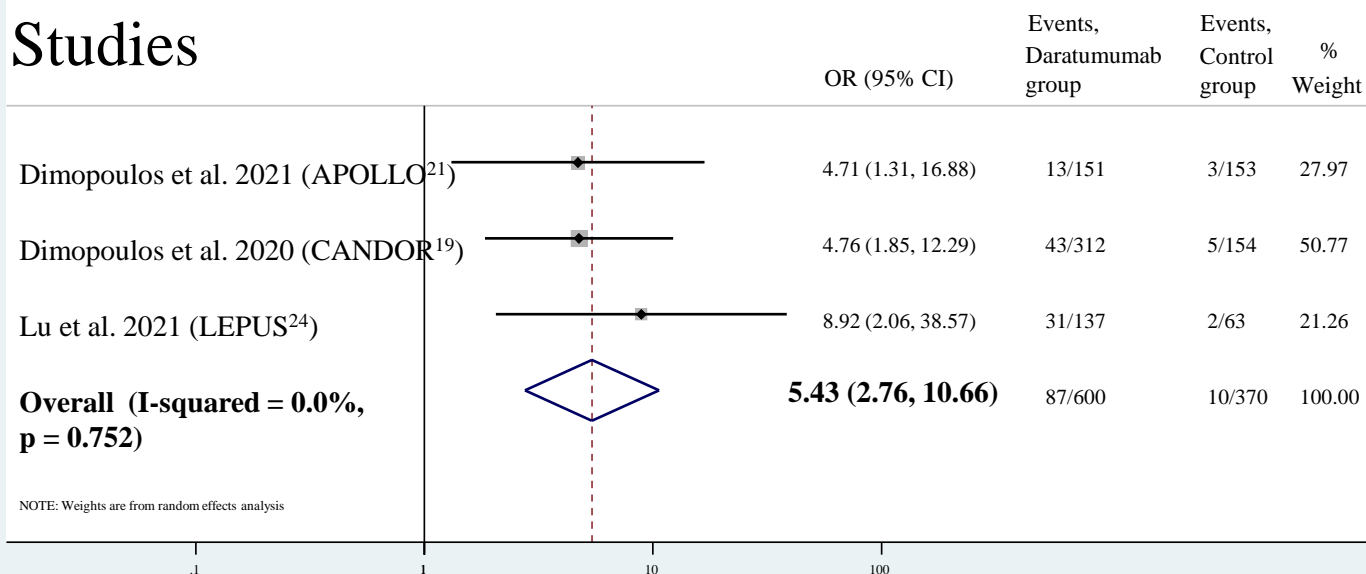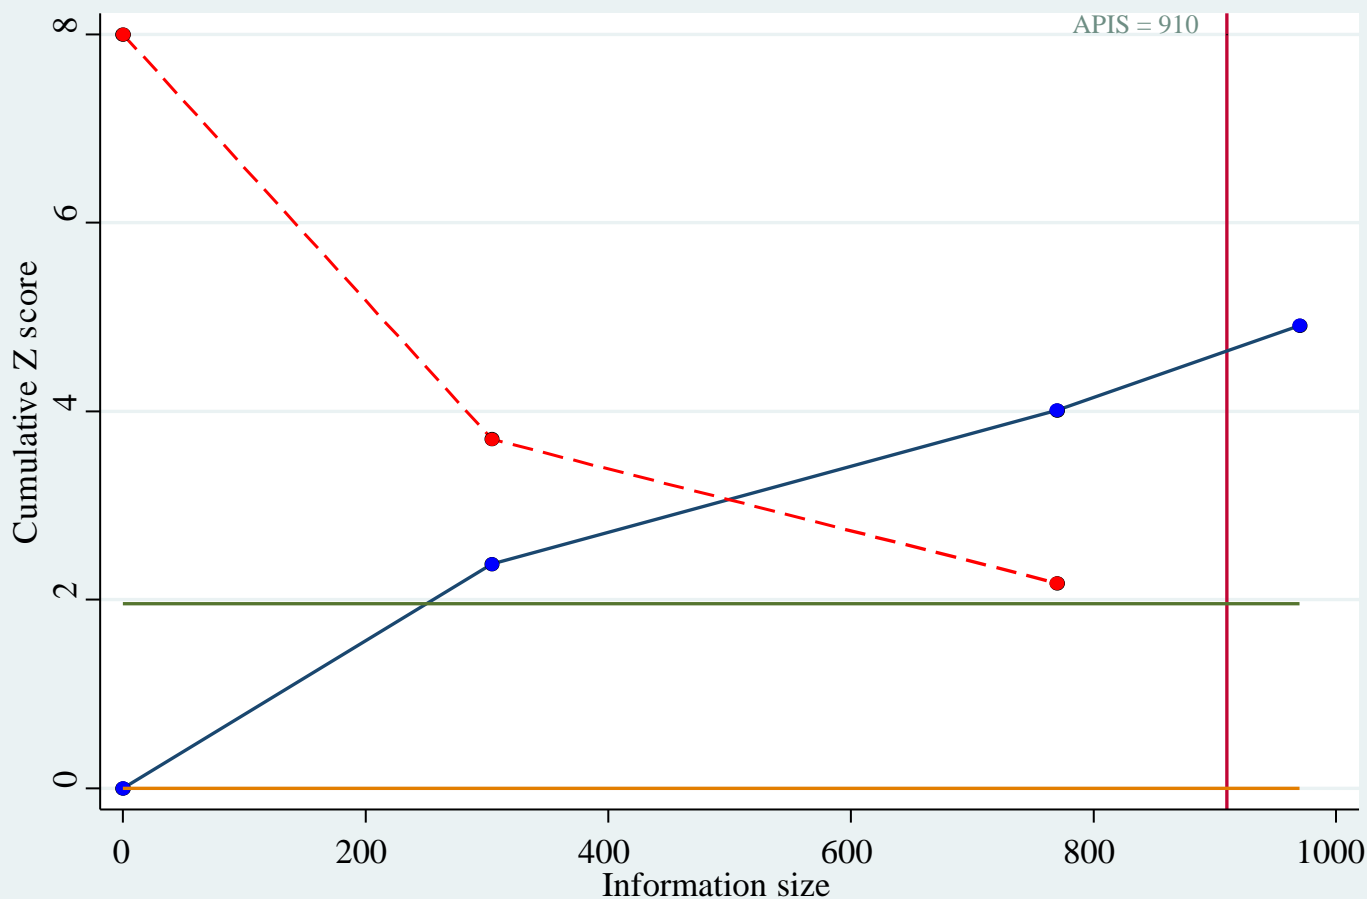

**Supplementary Figure 36:** Risk of bias assessment at study level and at domain level regarding minimal residual disease negativity in relapsed/refractory multiple myeloma

DPd, daratumumab, pomalidomide, and dexamethasone; Pd, pomalidomide and dexamethasone; DVd, daratumumab, bortezomib, and dexamethasone; Vd, bortezomib and dexamethasone; DRd, daratumumab, lenalidomide and dexamethasone; Rd, lenalidomide and dexamethasone

| Study                  | Interventions | Randomization process | Deviations from intended interventions | Missing outcome data | Measurement of the outcome | Selection of the reported results | Overall assessment |
|------------------------|---------------|-----------------------|----------------------------------------|----------------------|----------------------------|-----------------------------------|--------------------|
| Dimopoulos et al. 2021 | DPd vs Pd     | +                     | +                                      | +                    | +                          | ?                                 | +                  |
| Lu et al. 2021         | DVd vs Vd     | ?                     | +                                      | +                    | +                          | ?                                 | ?                  |
| Dimopoulos et al. 2016 | DRd vs Rd     | +                     | +                                      | +                    | +                          | ?                                 | +                  |

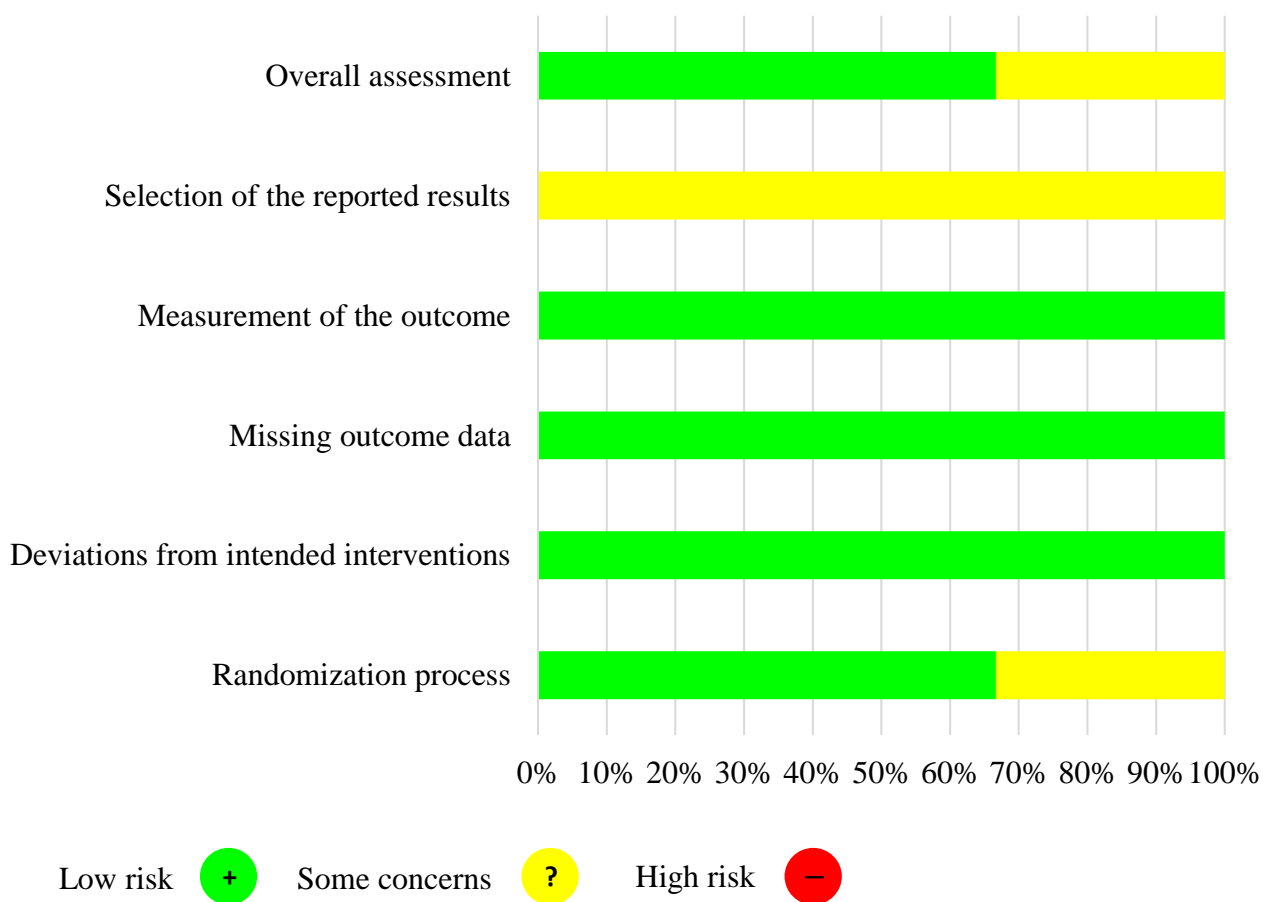



**Supplementary Figure 37:** Forest plot and Trial Sequential Analysis representing that addition of daratumumab to backbone therapies increases the chance for achieving stringent complete response in relapsed/refractory multiple myeloma

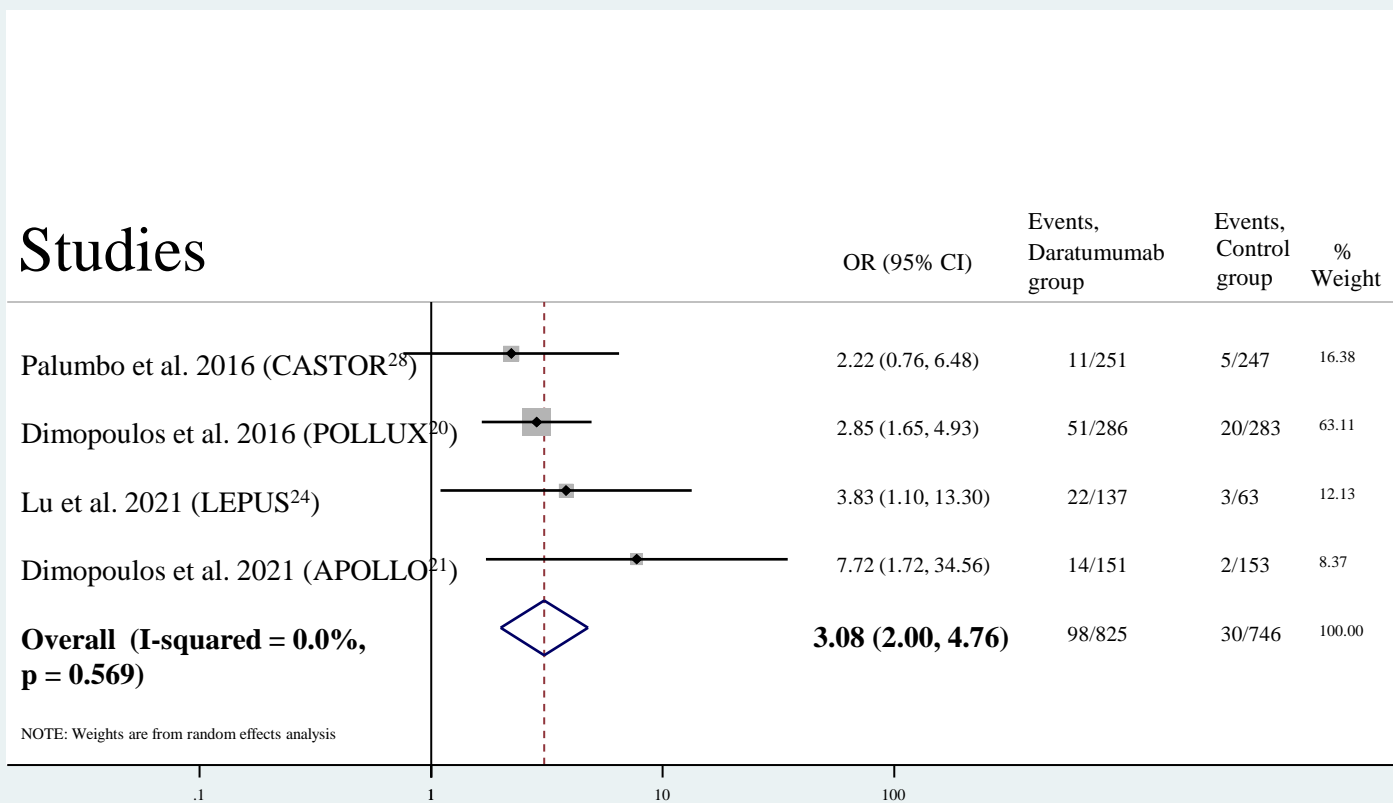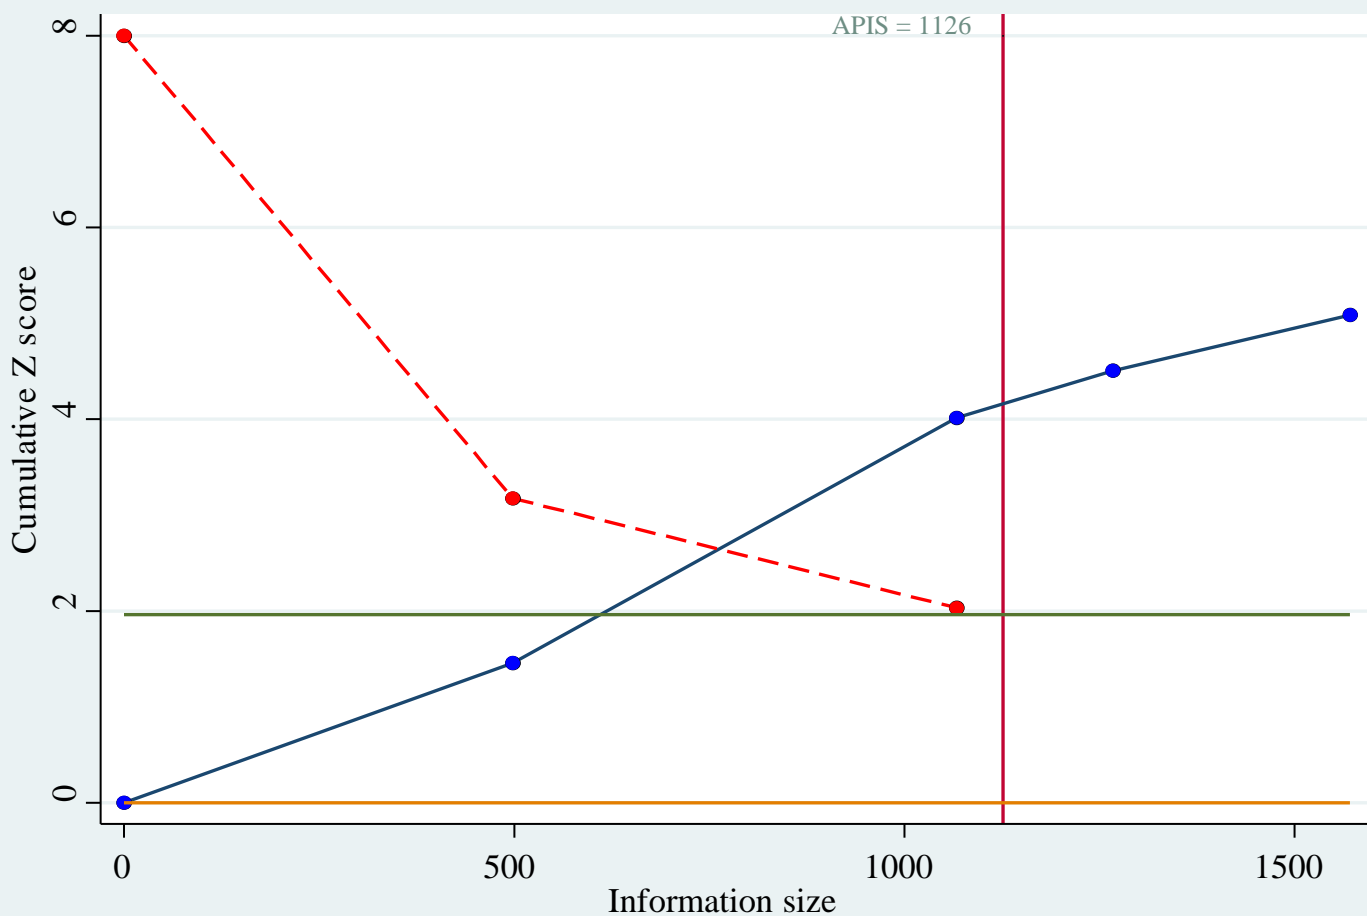

**Supplementary Figure 38:** Risk of bias assessment at study level and at domain level regarding stringent complete response in relapsed/refractory multiple myeloma

DVd, daratumumab, bortezomib, and dexamethasone; Vd, bortezomib and dexamethasone; KdD, carfilzomib, dexamethasone, and daratumumab; Kd, carfilzomib and dexamethasone; DRd, daratumumab, lenalidomide and dexamethasone; Rd, lenalidomide and dexamethasone

| Study                  | Interventions | Randomization process | Deviations from intended interventions | Missing outcome data | Measurement of the outcome | Selection of the reported results | Overall assessment |
|------------------------|---------------|-----------------------|----------------------------------------|----------------------|----------------------------|-----------------------------------|--------------------|
| Lu et al. 2021         | DVd vs Vd     | ?                     | +                                      | +                    | +                          | ?                                 | ?                  |
| Dimopoulos et al. 2020 | KdD vs Kd     | +                     | +                                      | +                    | +                          | +                                 | +                  |
| Palumbo et al. 2016    | DVd vs Vd     | ?                     | +                                      | +                    | +                          | ?                                 | ?                  |
| Dimopoulos et al. 2016 | DRd vs Rd     | +                     | +                                      | +                    | +                          | ?                                 | +                  |

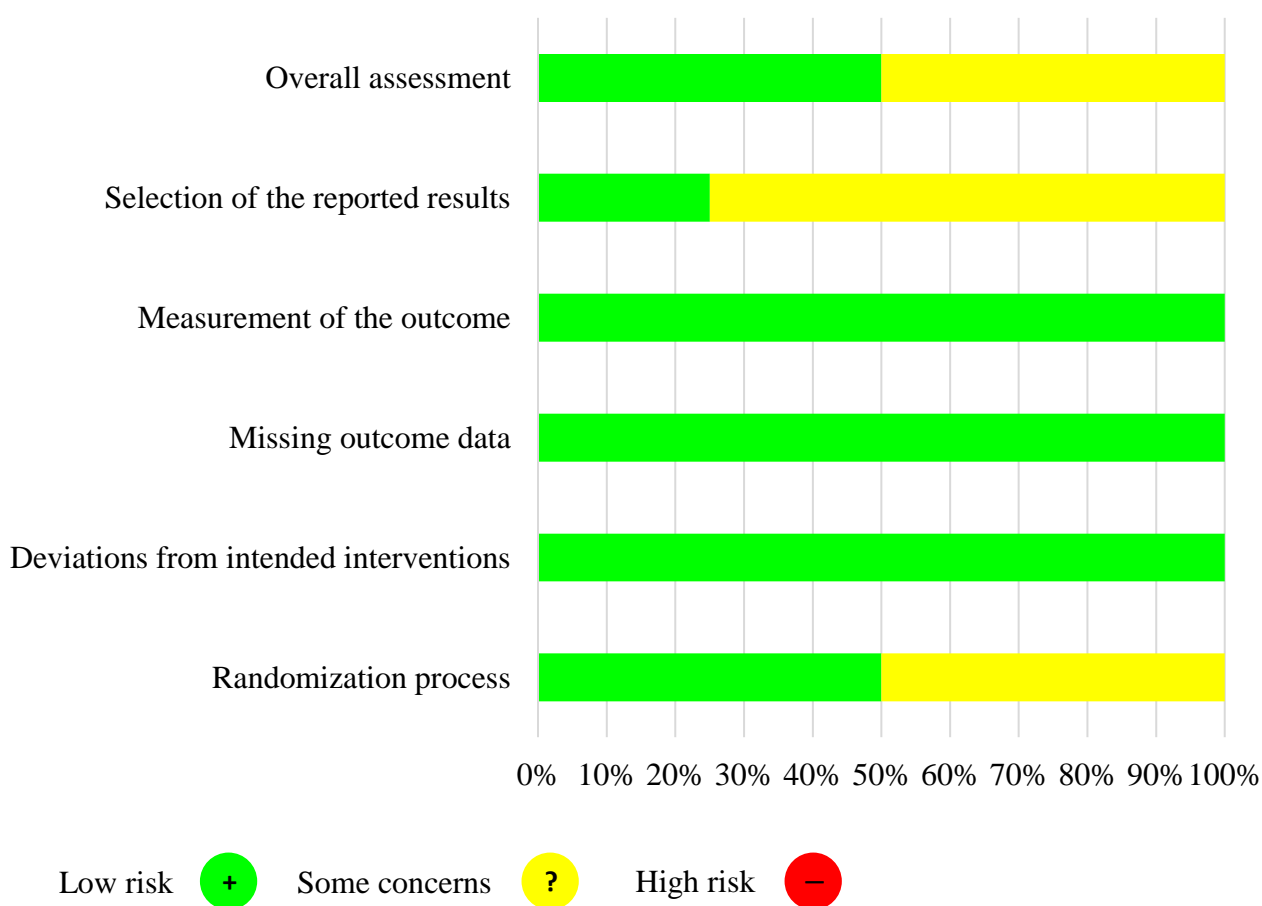

**Supplementary Figure 39:** Forest plot and Trial Sequential Analysis representing that addition of daratumumab to backbone therapies increases the chance for achieving complete response or better in relapsed/refractory multiple myeloma

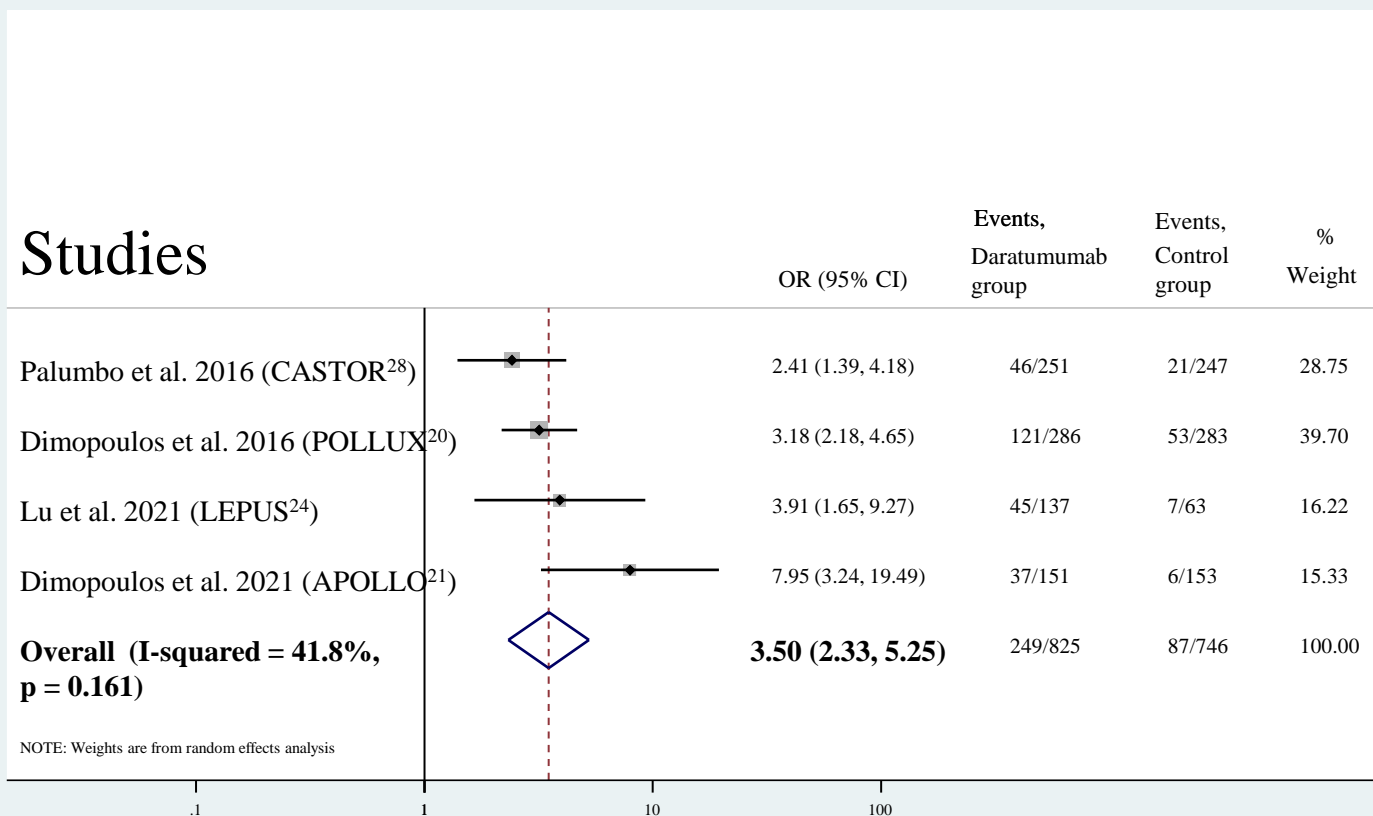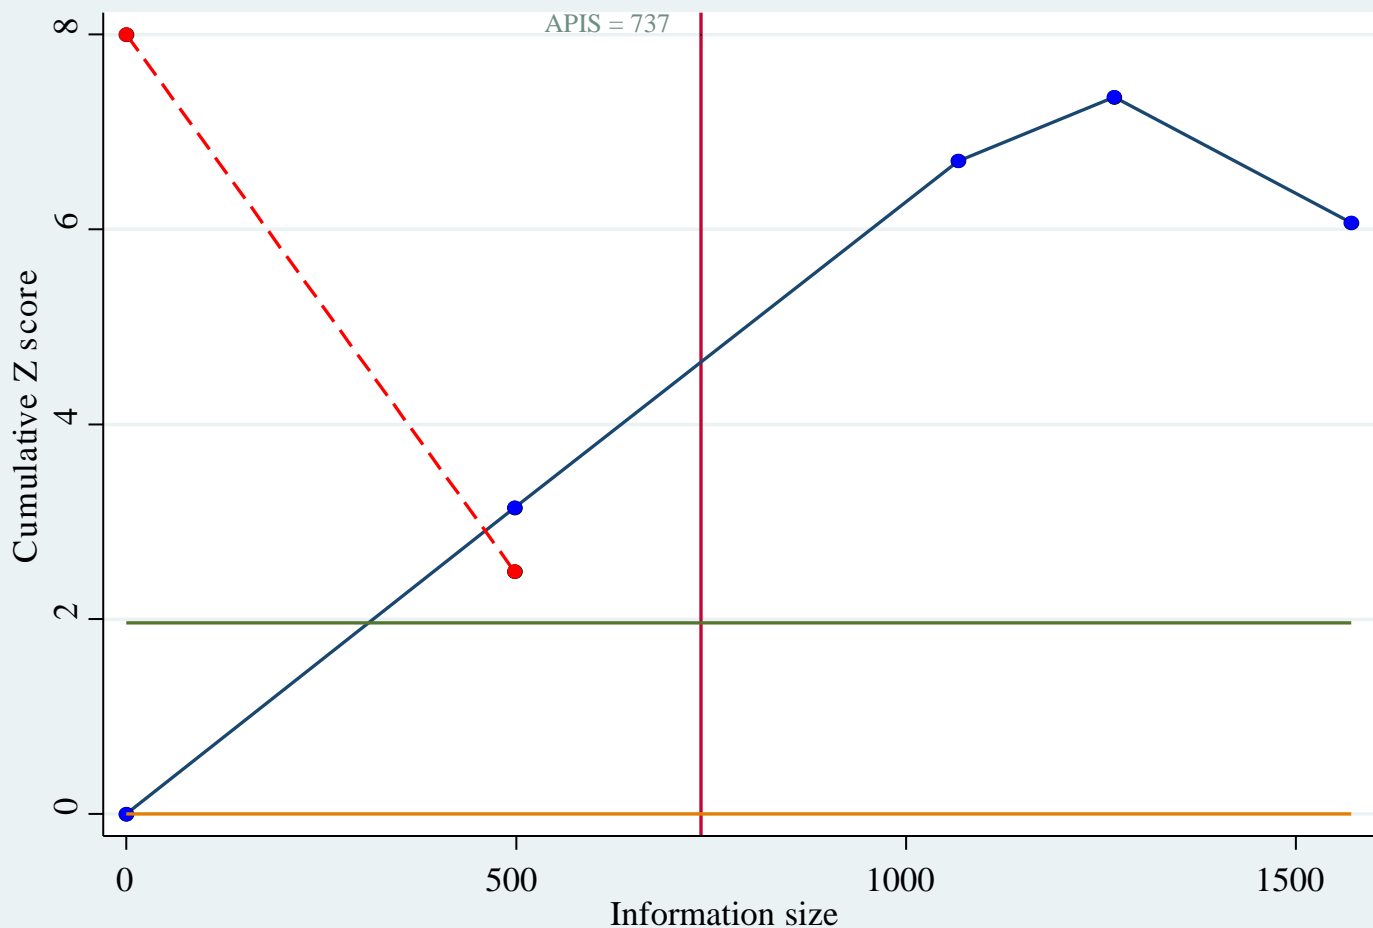

**Supplementary Figure 40:** Risk of bias assessment at study level and at domain level regarding complete response or better in relapsed/refractory multiple myeloma

DPd, daratumumab, pomalidomide, and dexamethasone; Pd, pomalidomide and dexamethasone; DVd, daratumumab, bortezomib, and dexamethasone; Vd, bortezomib and dexamethasone; DRd, daratumumab, lenalidomide and dexamethasone; Rd, lenalidomide and dexamethasone

| Study                  | Interventions | Randomization process | Deviations from intended interventions | Missing outcome data | Measurement of the outcome | Selection of the reported results | Overall assessment |
|------------------------|---------------|-----------------------|----------------------------------------|----------------------|----------------------------|-----------------------------------|--------------------|
| Dimopoulos et al. 2021 | DPd vs Pd     | +                     | +                                      | +                    | +                          | ?                                 | +                  |
| Lu et al. 2021         | DVd vs Vd     | ?                     | +                                      | +                    | +                          | ?                                 | ?                  |
| Palumbo et al. 2016    | DVd vs Vd     | ?                     | +                                      | +                    | +                          | ?                                 | ?                  |
| Dimopoulos et al. 2016 | DRd vs Rd     | +                     | +                                      | +                    | +                          | ?                                 | +                  |

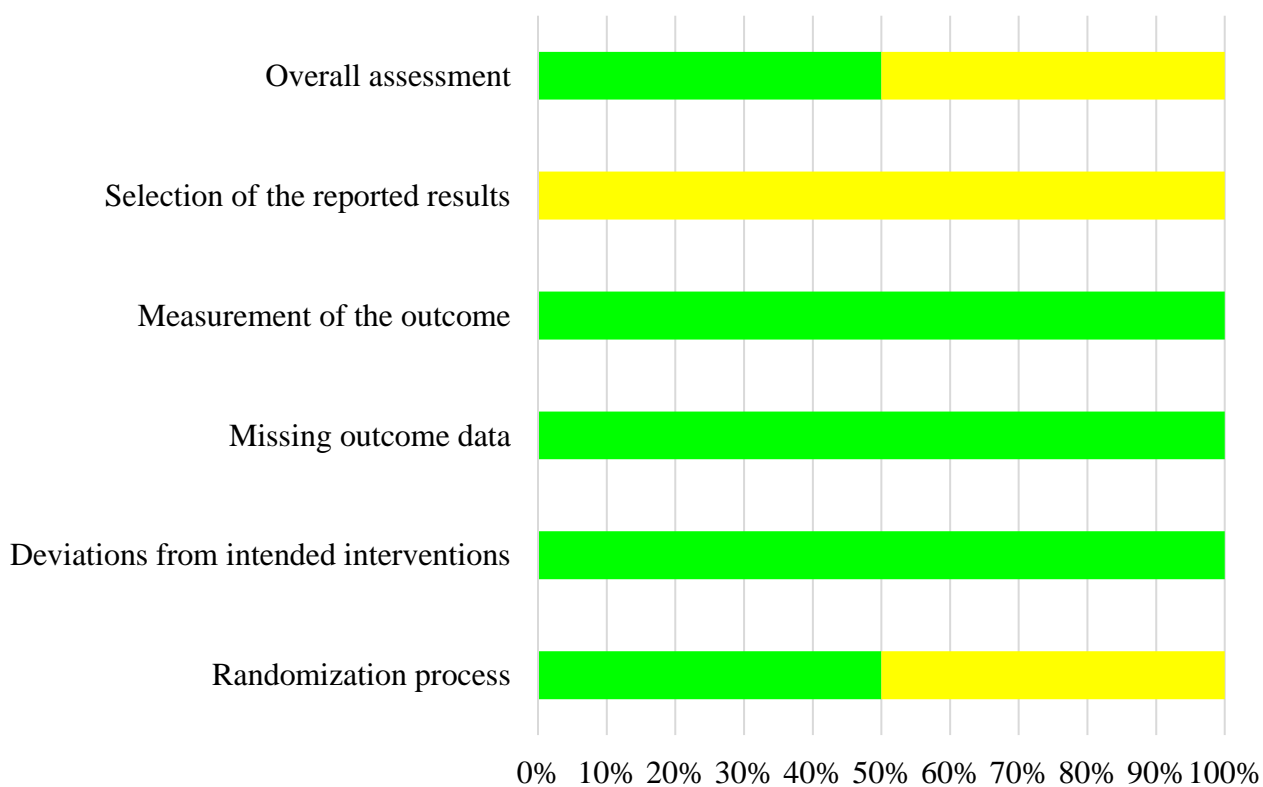

Low risk +    Some concerns ?    High risk -

**Supplementary Figure 41:** Forest plot and Trial Sequential Analysis representing that addition of daratumumab to backbone therapies decreases the chance for death or disease progression in relapsed/refractory multiple myeloma

## Studies

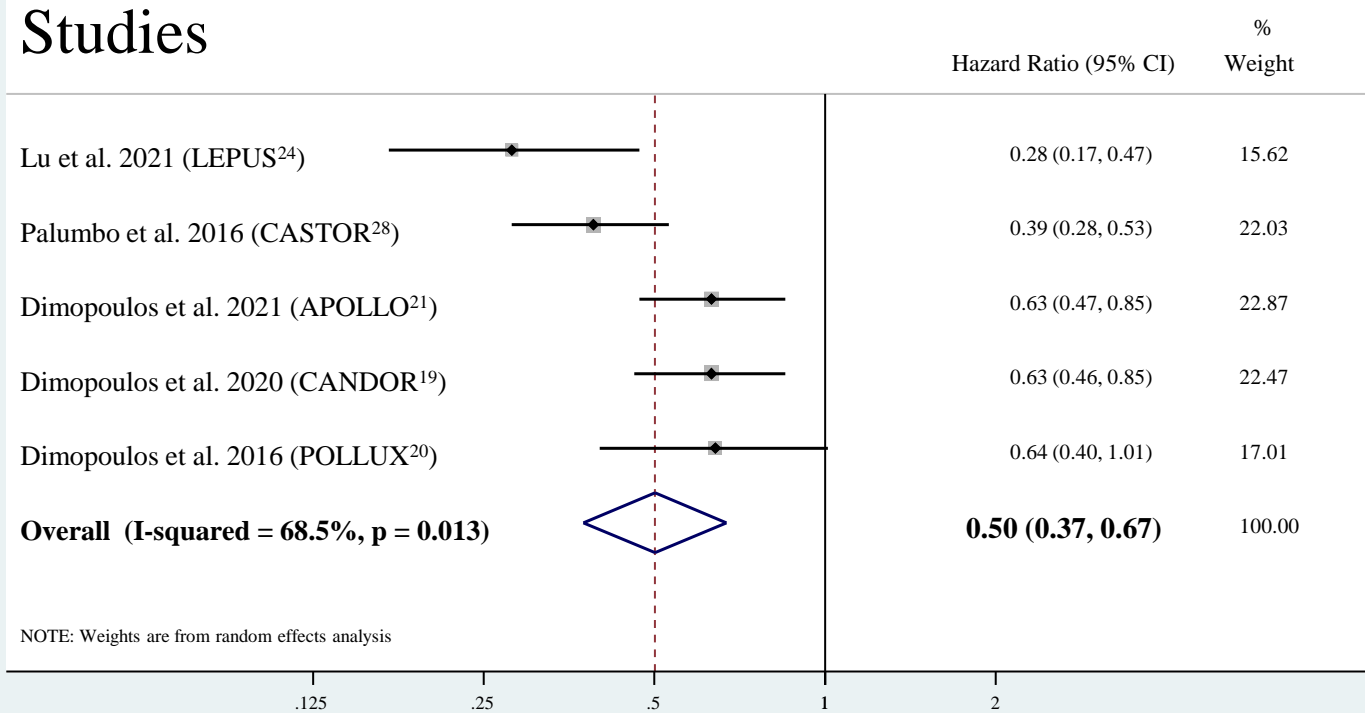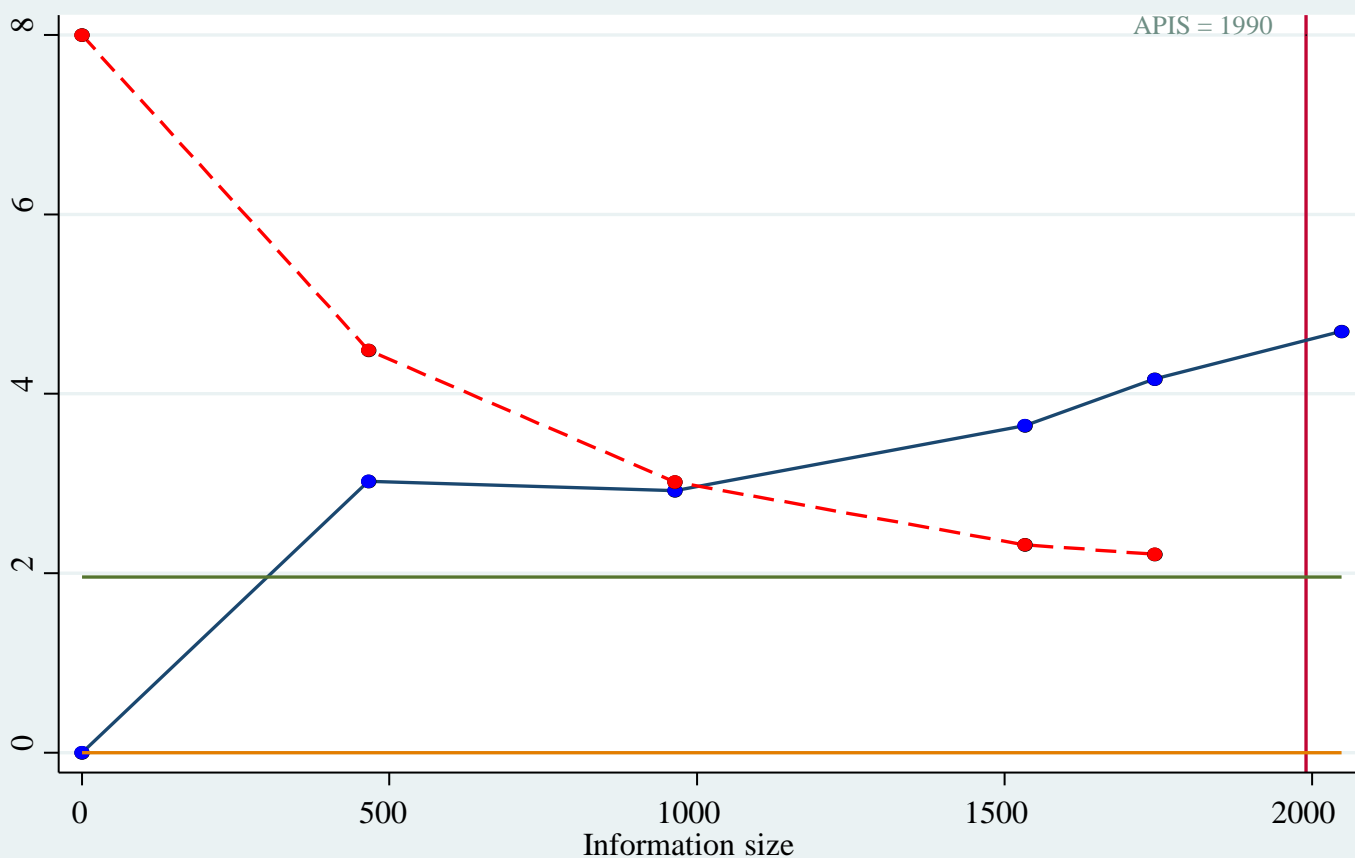

**Supplementary Figure 42:** Risk of bias assessment at study level and at domain level regarding death or disease progression in relapsed/refractory multiple myeloma

DPd, daratumumab, pomalidomide, and dexamethasone; Pd, pomalidomide and dexamethasone; DVd, daratumumab, bortezomib, and dexamethasone; Vd, bortezomib and dexamethasone; KdD, carfilzomib, dexamethasone, and daratumumab; Kd, carfilzomib and dexamethasone; DRd, daratumumab, lenalidomide and dexamethasone; Rd, lenalidomide and dexamethasone

| Study                  | Interventions | Randomization process | Deviations from intended interventions | Missing outcome data | Measurement of the outcome | Selection of the reported results | Overall assessment |
|------------------------|---------------|-----------------------|----------------------------------------|----------------------|----------------------------|-----------------------------------|--------------------|
| Dimopoulos et al. 2021 | DPd vs Pd     | +                     | +                                      | +                    | +                          | ?                                 | +                  |
| Lu et al. 2021         | DVd vs Vd     | ?                     | +                                      | +                    | +                          | ?                                 | ?                  |
| Dimopoulos et al. 2020 | KdD vs Kd     | +                     | +                                      | +                    | +                          | +                                 | +                  |
| Palumbo et al. 2016    | DVd vs Vd     | ?                     | +                                      | +                    | +                          | ?                                 | ?                  |
| Dimopoulos et al. 2016 | DRd vs Rd     | +                     | +                                      | +                    | +                          | ?                                 | +                  |

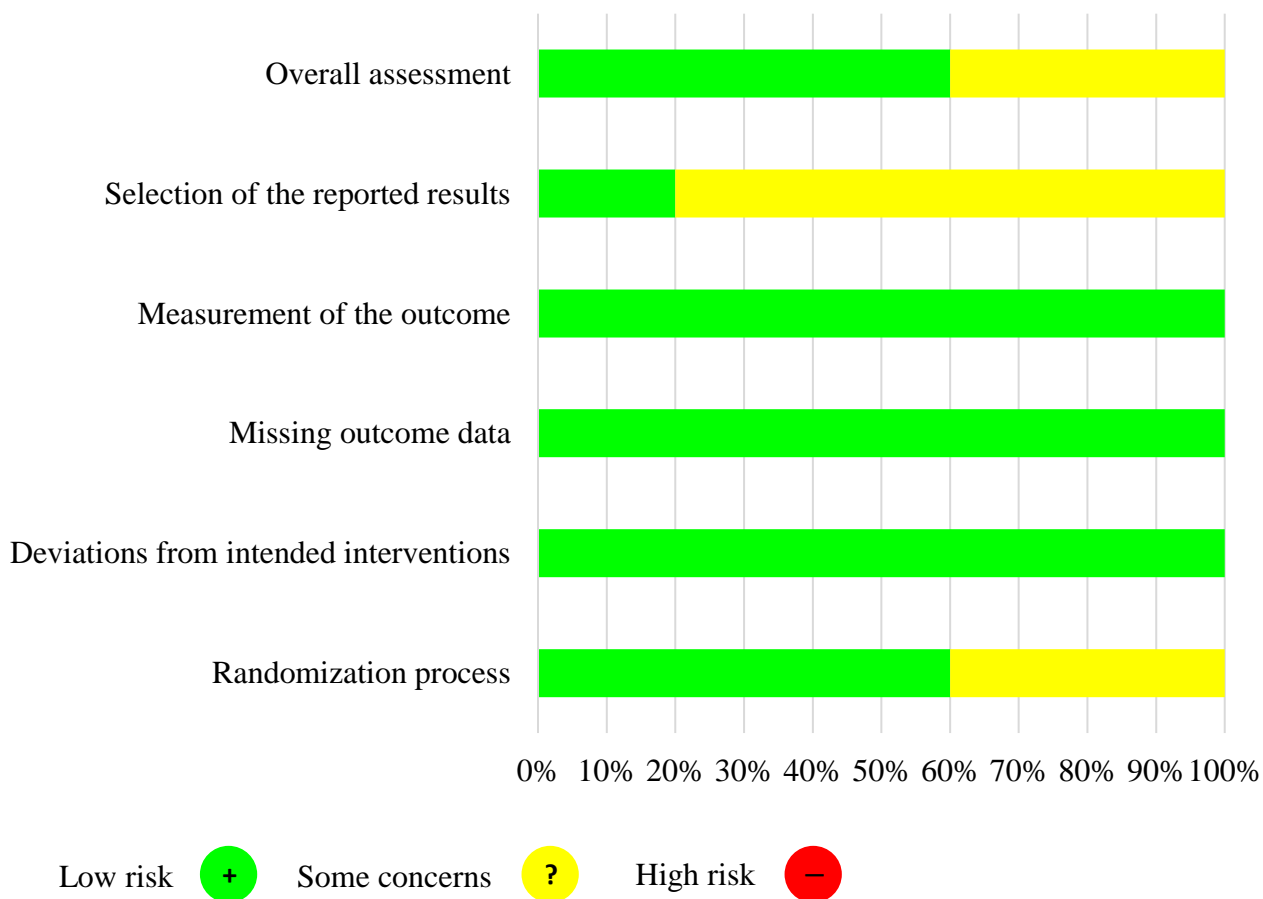

**Supplementary Figure 43:** Forest plot and Trial Sequential Analysis representing that addition of daratumumab to backbone therapies decreases the chance for death or disease progression in high cytogenetic risk relapsed/refractory multiple myeloma

## Studies

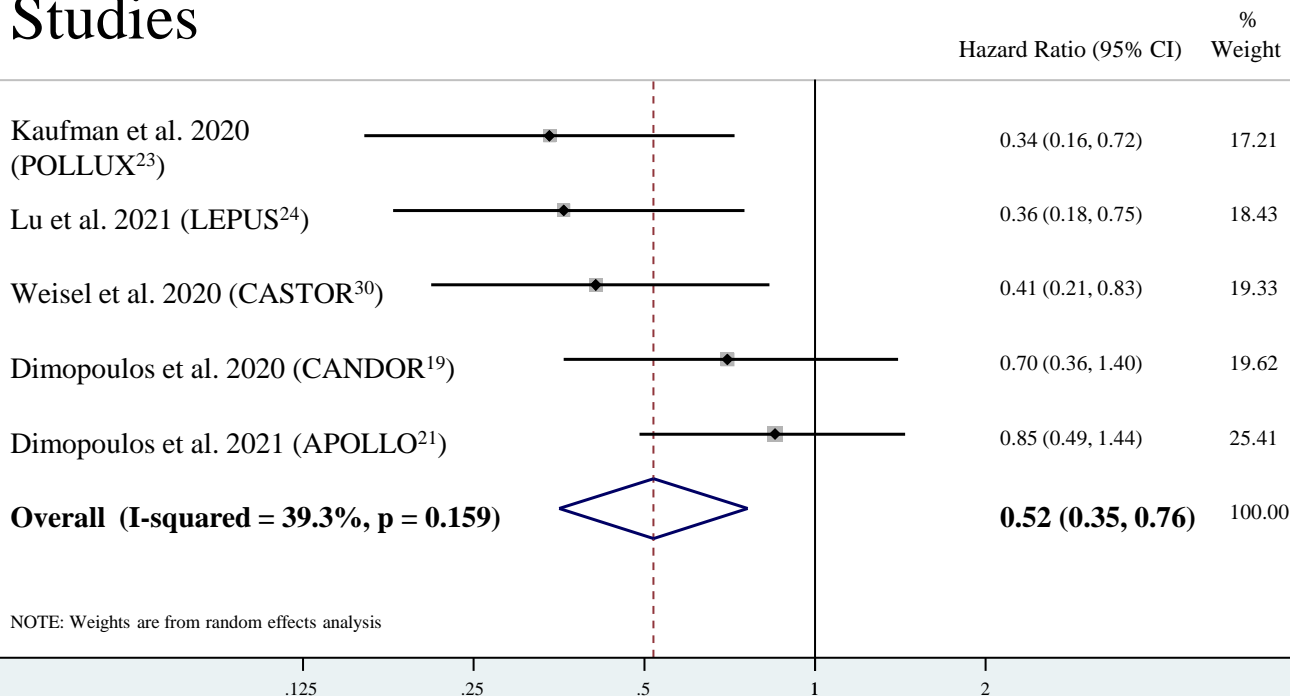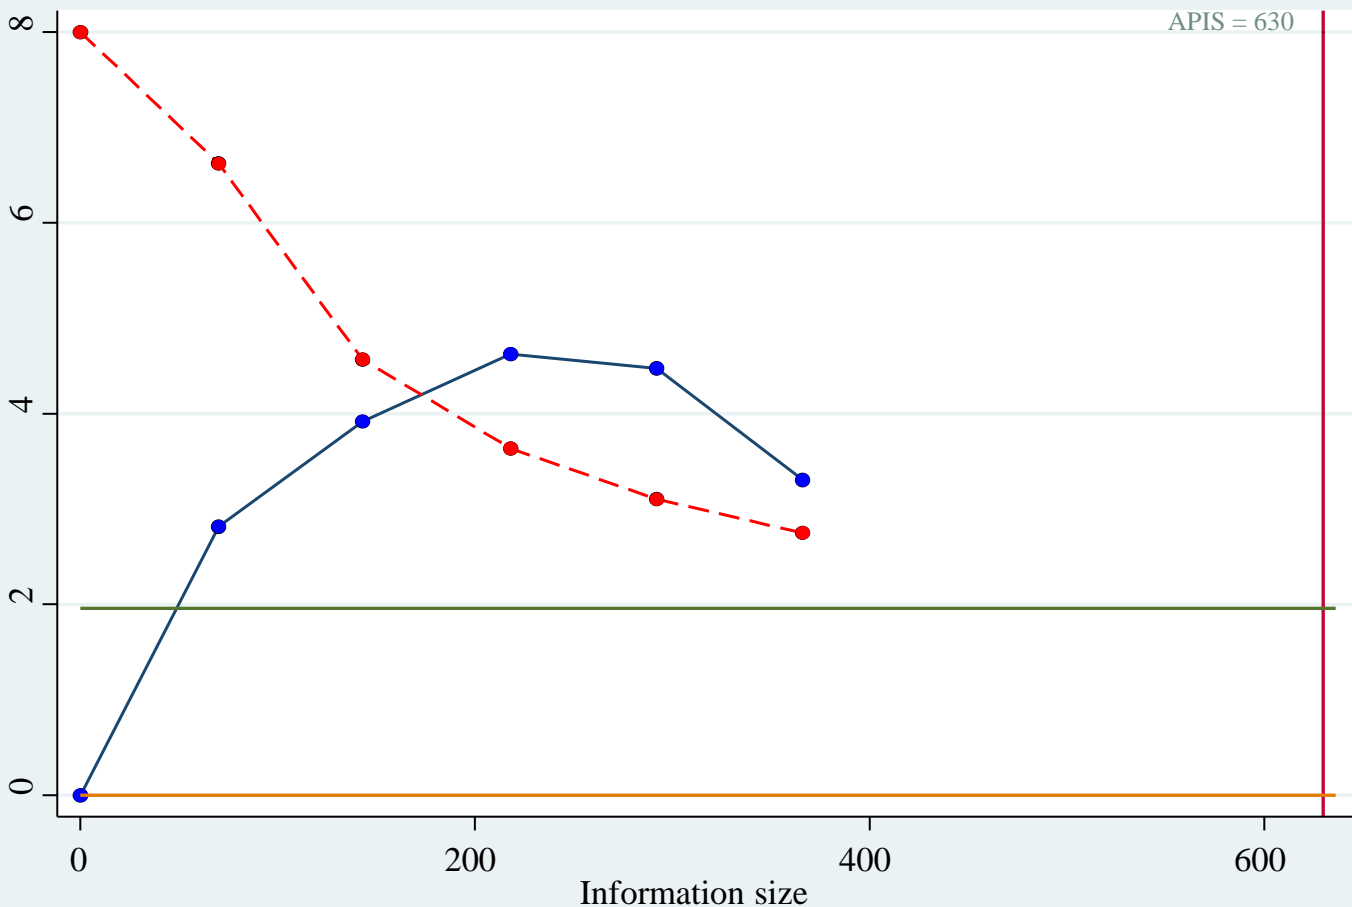

**Supplementary Figure 44:** Risk of bias assessment at study level and at domain level regarding death or disease progression in high cytogenetic risk relapsed/refractory multiple myeloma

DPd, daratumumab, pomalidomide, and dexamethasone; Pd, pomalidomide and dexamethasone; DVd, daratumumab, bortezomib, and dexamethasone; Vd, bortezomib and dexamethasone; KdD, carfilzomib, dexamethasone, and daratumumab; Kd, carfilzomib and dexamethasone; DRd, daratumumab, lenalidomide and dexamethasone; Rd, lenalidomide and dexamethasone

| Study                  | Interventions | Randomization process | Deviations from intended interventions | Missing outcome data | Measurement of the outcome | Selection of the reported results | Overall assessment |
|------------------------|---------------|-----------------------|----------------------------------------|----------------------|----------------------------|-----------------------------------|--------------------|
| Dimopoulos et al. 2021 | DPd vs Pd     | +                     | +                                      | +                    | +                          | ?                                 | +                  |
| Kaufman et al. 2021    | DRd vs Rd     | +                     | +                                      | +                    | +                          | ?                                 | +                  |
| Lu et al. 2021         | DVd vs Vd     | ?                     | +                                      | +                    | +                          | ?                                 | ?                  |
| Dimopoulos et al. 2020 | KdD vs Kd     | +                     | +                                      | +                    | +                          | +                                 | +                  |
| Weisel et al. 2020     | DVd vs Vd     | ?                     | +                                      | +                    | +                          | ?                                 | ?                  |

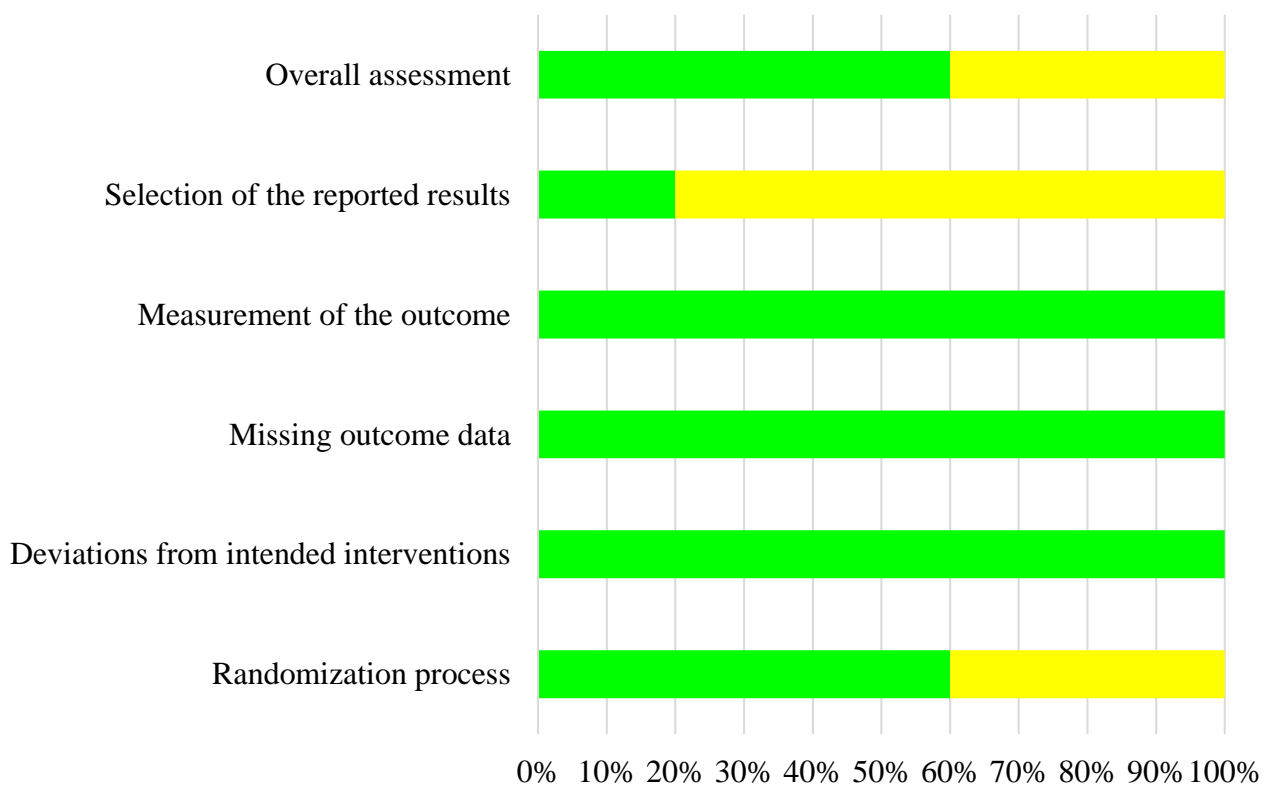

Low risk +    Some concerns ?    High risk -



**Supplementary Figure 45:** Forest plot and Trial Sequential Analysis representing that addition of daratumumab to backbone therapies decreases the chance for death or disease progression in standard cytogenetic risk relapsed/refractory multiple myeloma

## Studies

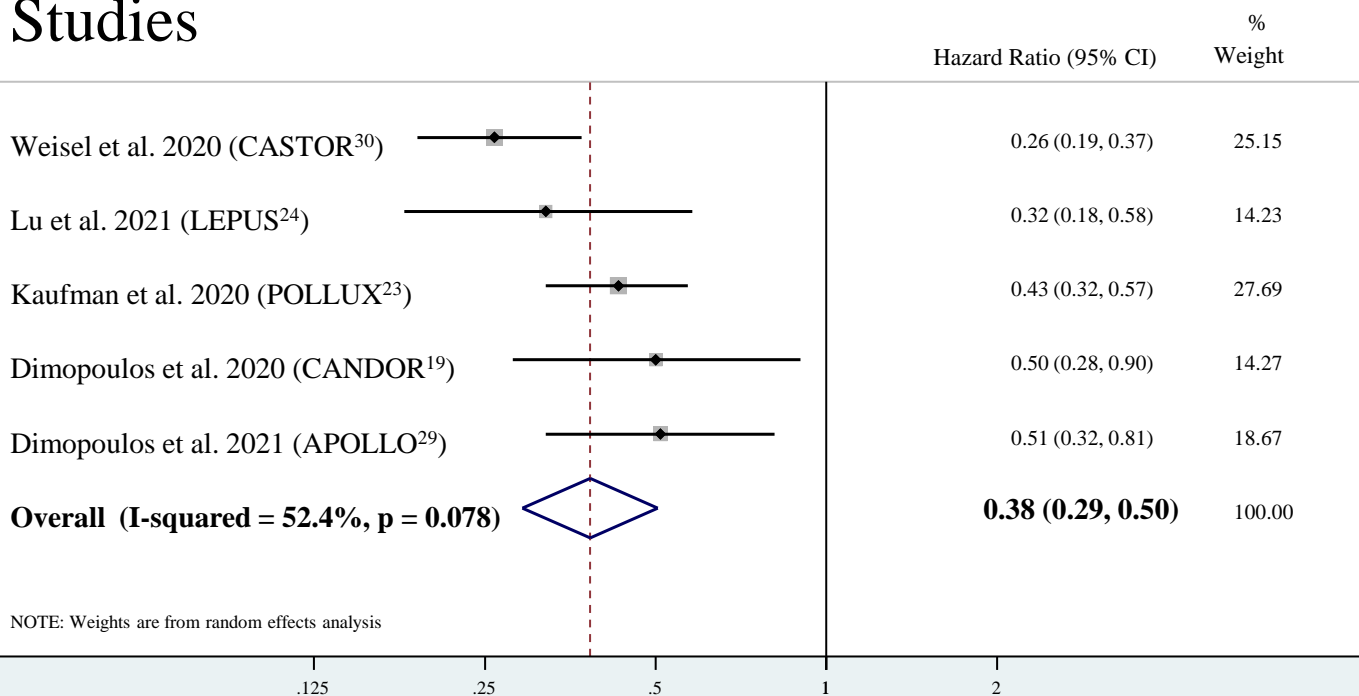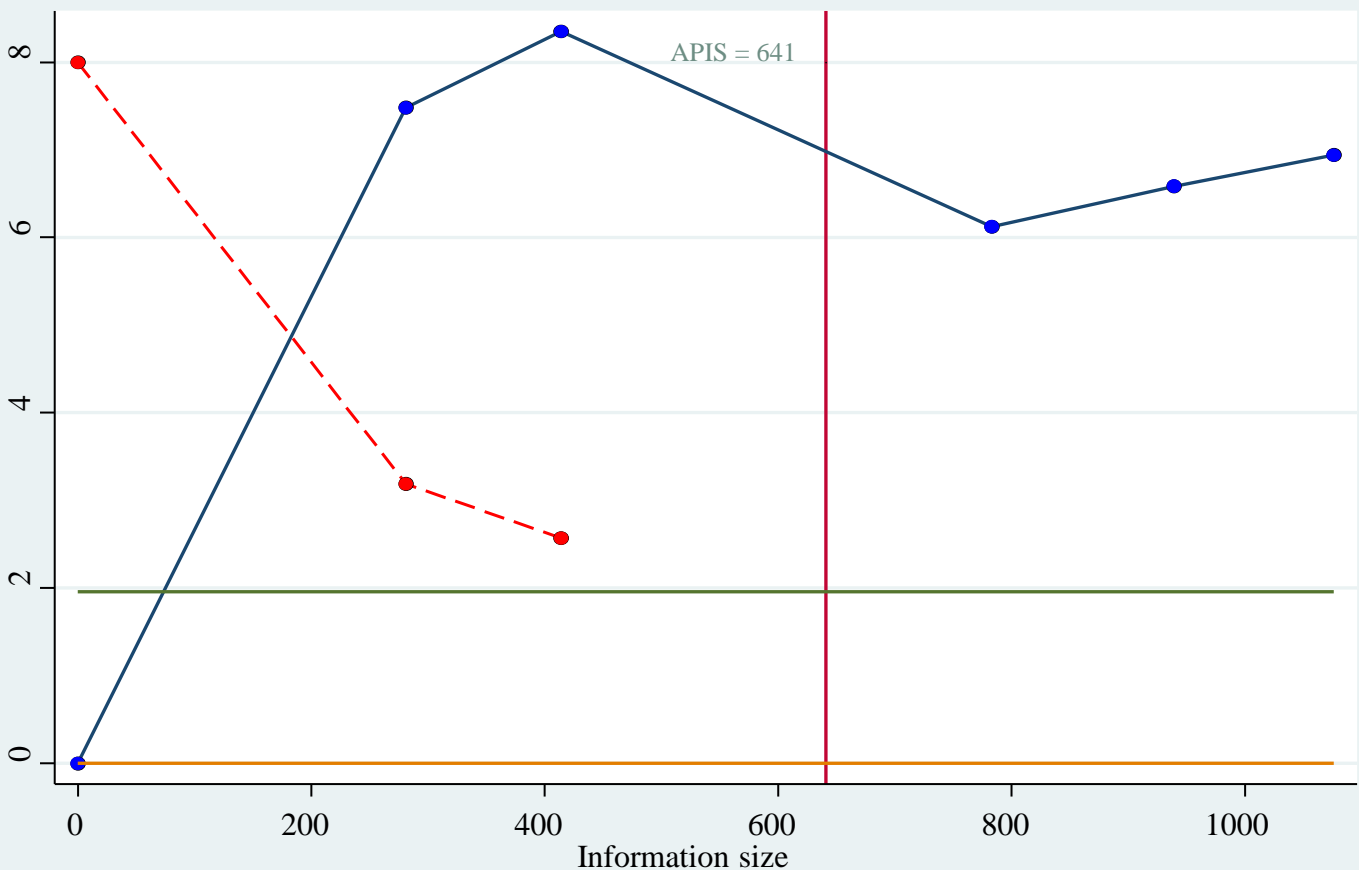

**Supplementary Figure 46:** Risk of bias assessment at study level and at domain level regarding death or disease progression in standard cytogenetic risk relapsed/refractory multiple myeloma

DPd, daratumumab, pomalidomide, and dexamethasone; Pd, pomalidomide and dexamethasone; DVd, daratumumab, bortezomib, and dexamethasone; Vd, bortezomib and dexamethasone; KdD, carfilzomib, dexamethasone, and daratumumab; Kd, carfilzomib and dexamethasone; DRd, daratumumab, lenalidomide and dexamethasone; Rd, lenalidomide and dexamethasone

| Study                  | Interventions | Randomization process | Deviations from intended interventions | Missing outcome data | Measurement of the outcome | Selection of the reported results | Overall assessment |
|------------------------|---------------|-----------------------|----------------------------------------|----------------------|----------------------------|-----------------------------------|--------------------|
| Dimopoulos et al. 2021 | DPd vs Pd     | +                     | +                                      | +                    | +                          | ?                                 | +                  |
| Kaufman et al. 2021    | DRd vs Rd     | +                     | +                                      | +                    | +                          | ?                                 | +                  |
| Lu et al. 2021         | DVd vs Vd     | ?                     | +                                      | +                    | +                          | ?                                 | ?                  |
| Dimopoulos et al. 2020 | KdD vs Kd     | +                     | +                                      | +                    | +                          | +                                 | +                  |
| Weisel et al. 2020     | DVd vs Vd     | ?                     | +                                      | +                    | +                          | ?                                 | ?                  |

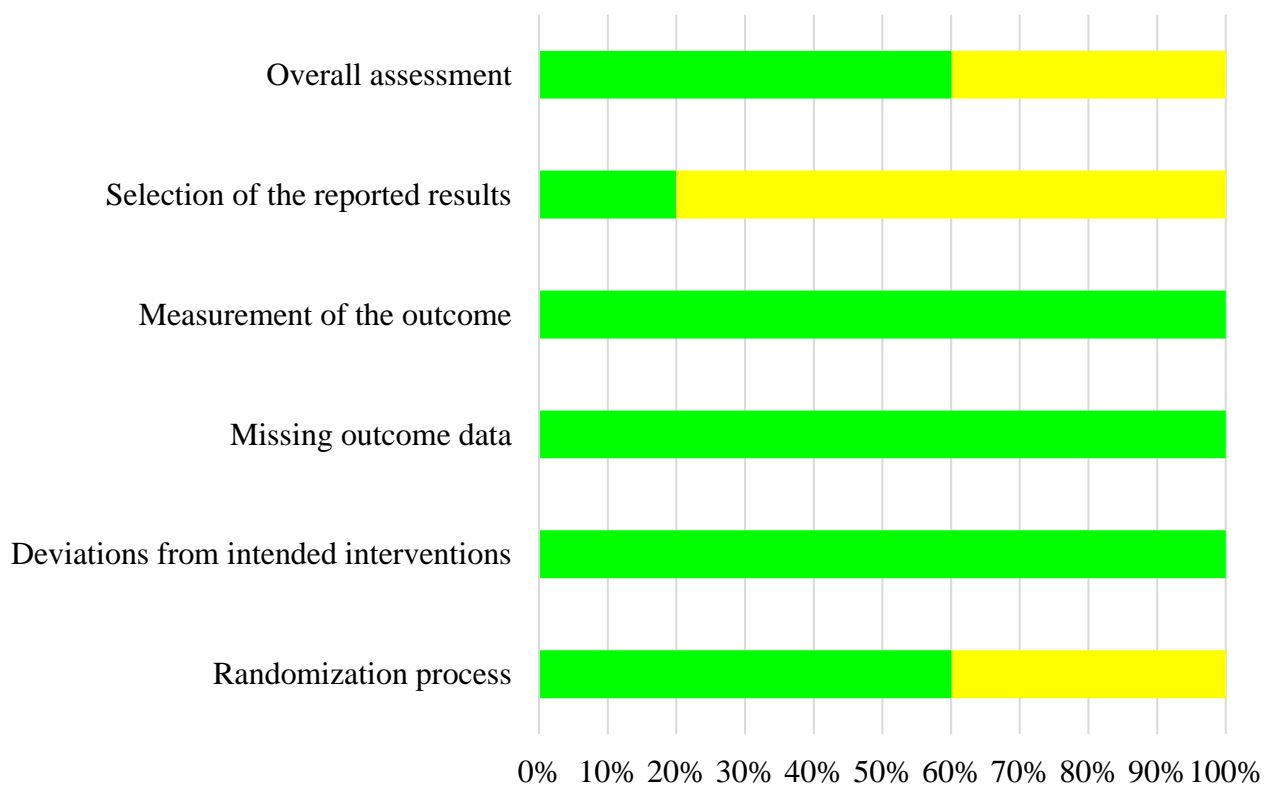

Low risk + Some concerns ? High risk -

**Supplementary Figure 47:** Forest plot and Trial Sequential Analysis representing that addition of daratumumab to backbone therapies increases the chance for all grade thrombocytopenia in relapsed/refractory diagnosed multiple myeloma

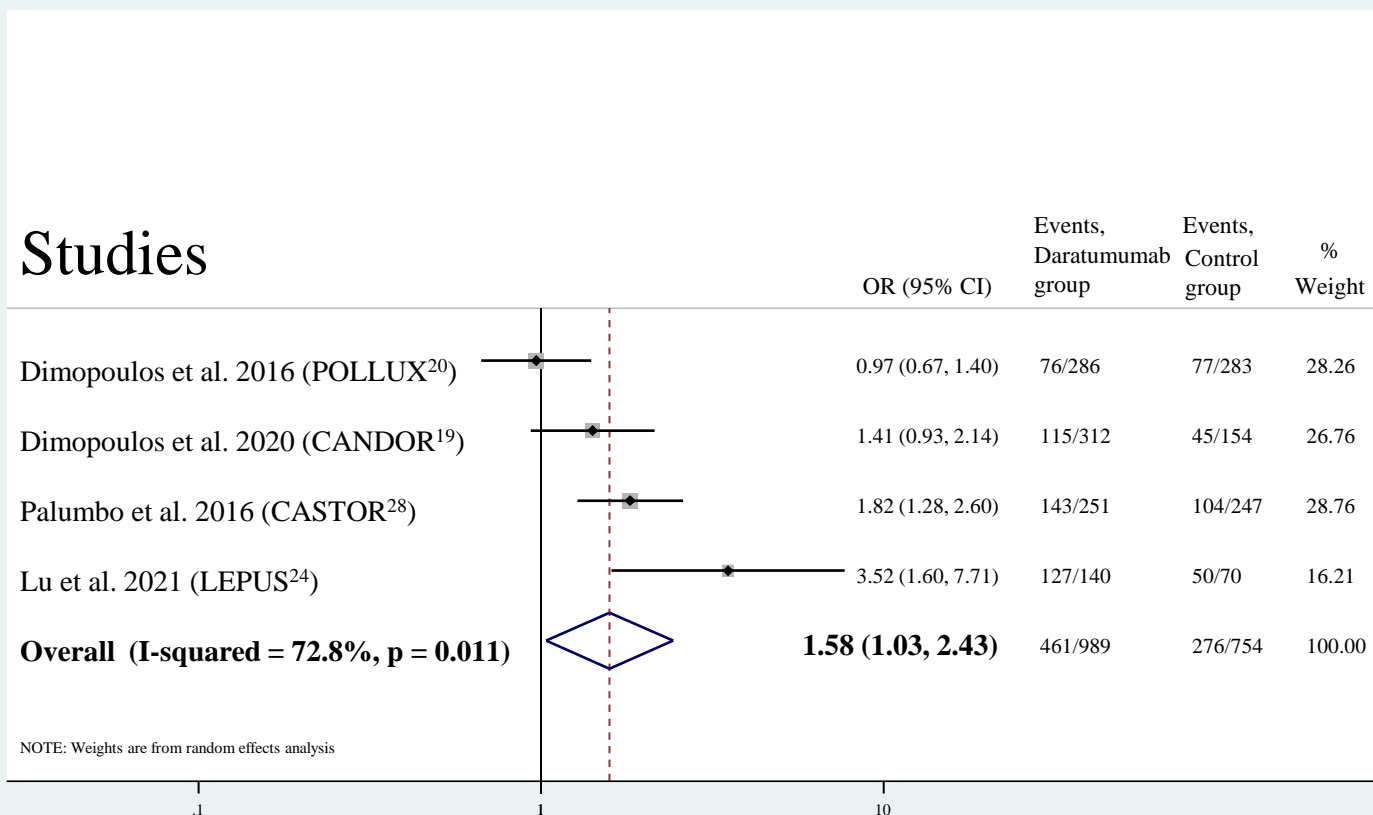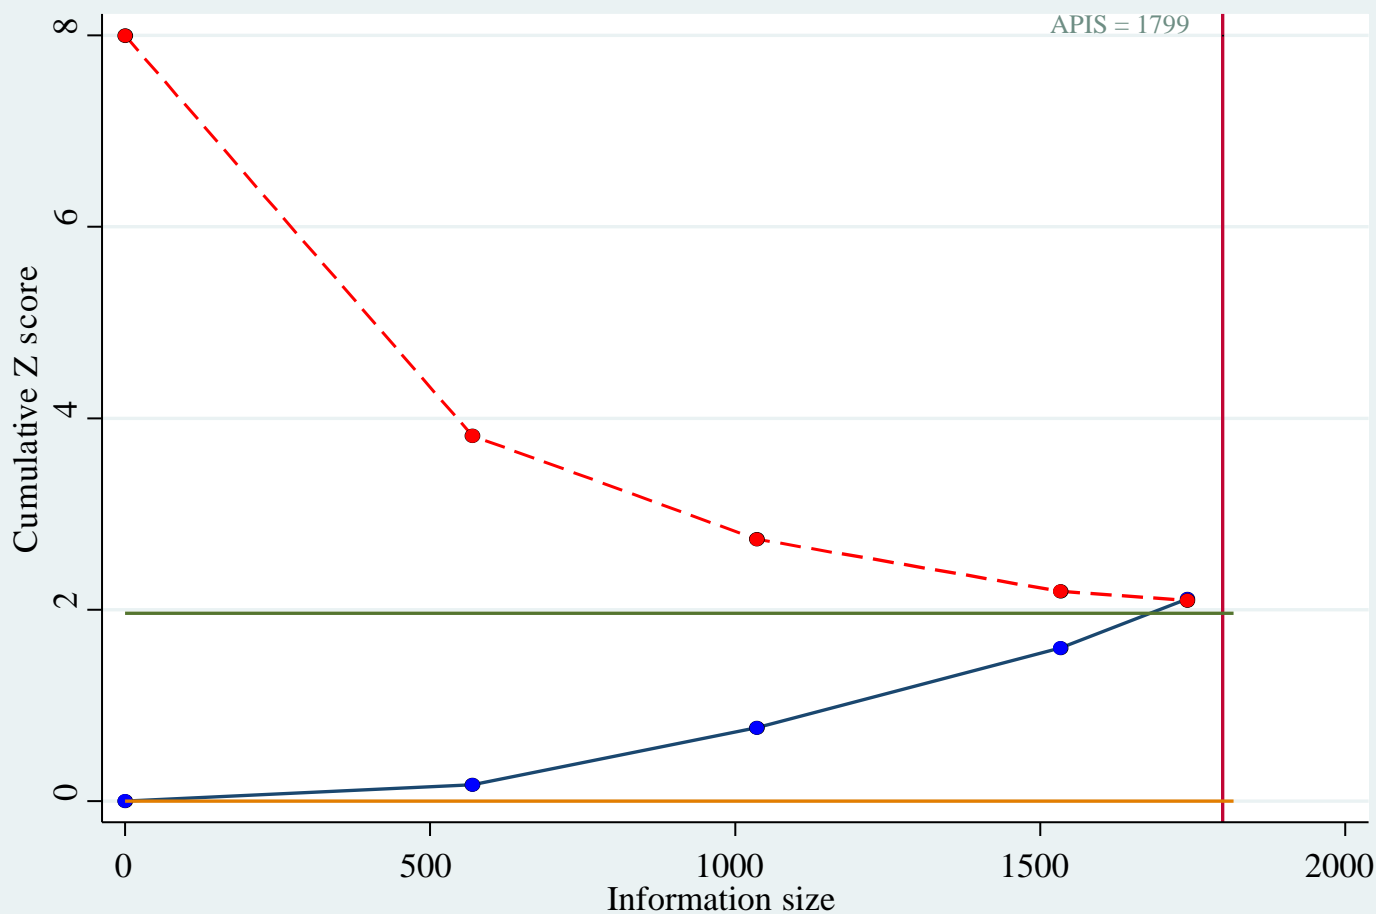

**Supplementary Figure 48:** Risk of bias assessment at study level and at domain level regarding all grade thrombocytopenia in relapsed/refractory multiple myeloma

KdD, carfilzomib, dexamethasone, and daratumumab; Kd, carfilzomib and dexamethasone; DVd, daratumumab, bortezomib, and dexamethasone; Vd, bortezomib and dexamethasone; DRd, daratumumab, lenalidomide and dexamethasone; Rd, lenalidomide and dexamethasone

| Study                  | Interventions | Randomization process | Deviations from intended interventions | Missing outcome data | Measurement of the outcome | Selection of the reported results | Overall assessment |
|------------------------|---------------|-----------------------|----------------------------------------|----------------------|----------------------------|-----------------------------------|--------------------|
| Lu et al. 2021         | DVd vs Vd     | ?                     | +                                      | +                    | +                          | ?                                 | ?                  |
| Dimopoulos et al. 2020 | KdD vs Kd     | +                     | +                                      | +                    | +                          | +                                 | +                  |
| Palumbo et al. 2016    | DVd vs Vd     | ?                     | +                                      | +                    | +                          | ?                                 | ?                  |
| Dimopoulos et al. 2016 | DRd vs Rd     | +                     | +                                      | +                    | +                          | ?                                 | +                  |

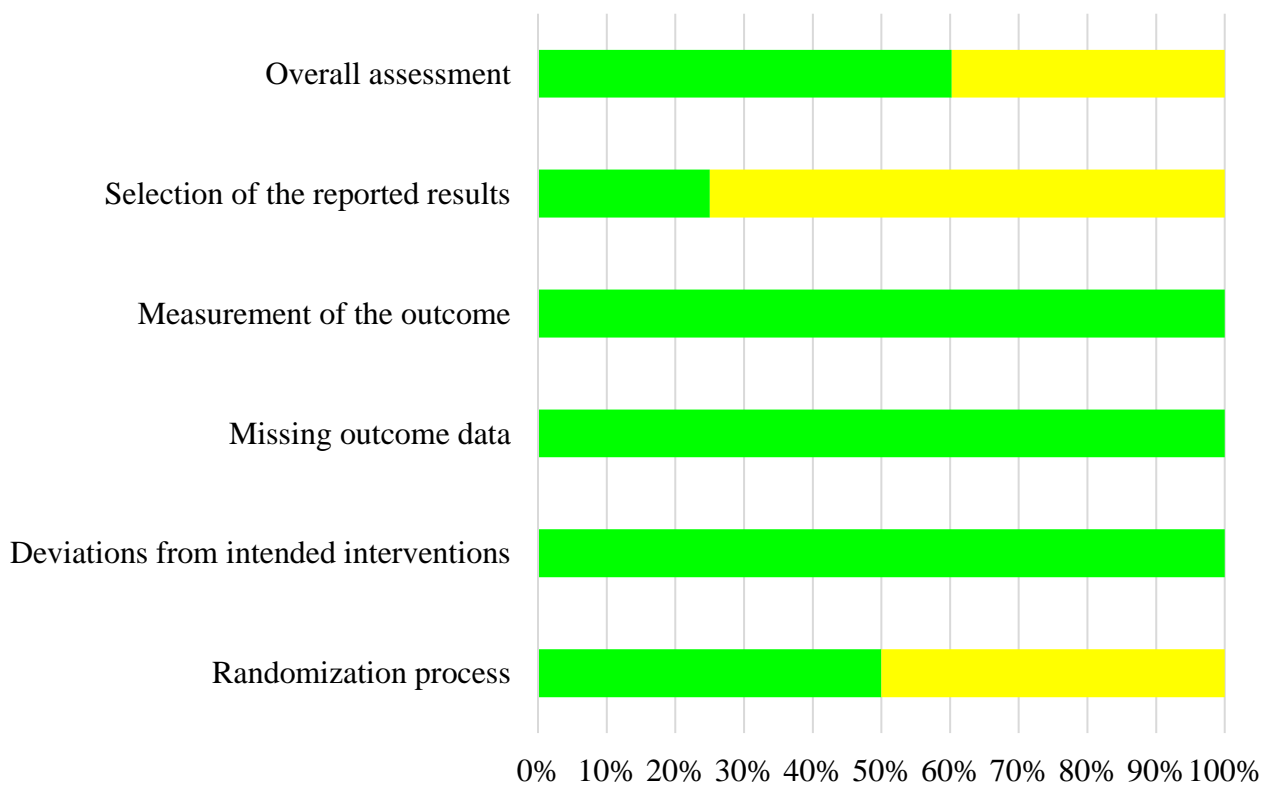

Low risk + Some concerns ? High risk -

**Supplementary Figure 49:** Forest plot and Trial Sequential Analysis representing that addition of daratumumab to backbone therapies increases the chance for grade 3-4 thrombocytopenia in relapsed/refractory diagnosed multiple myeloma

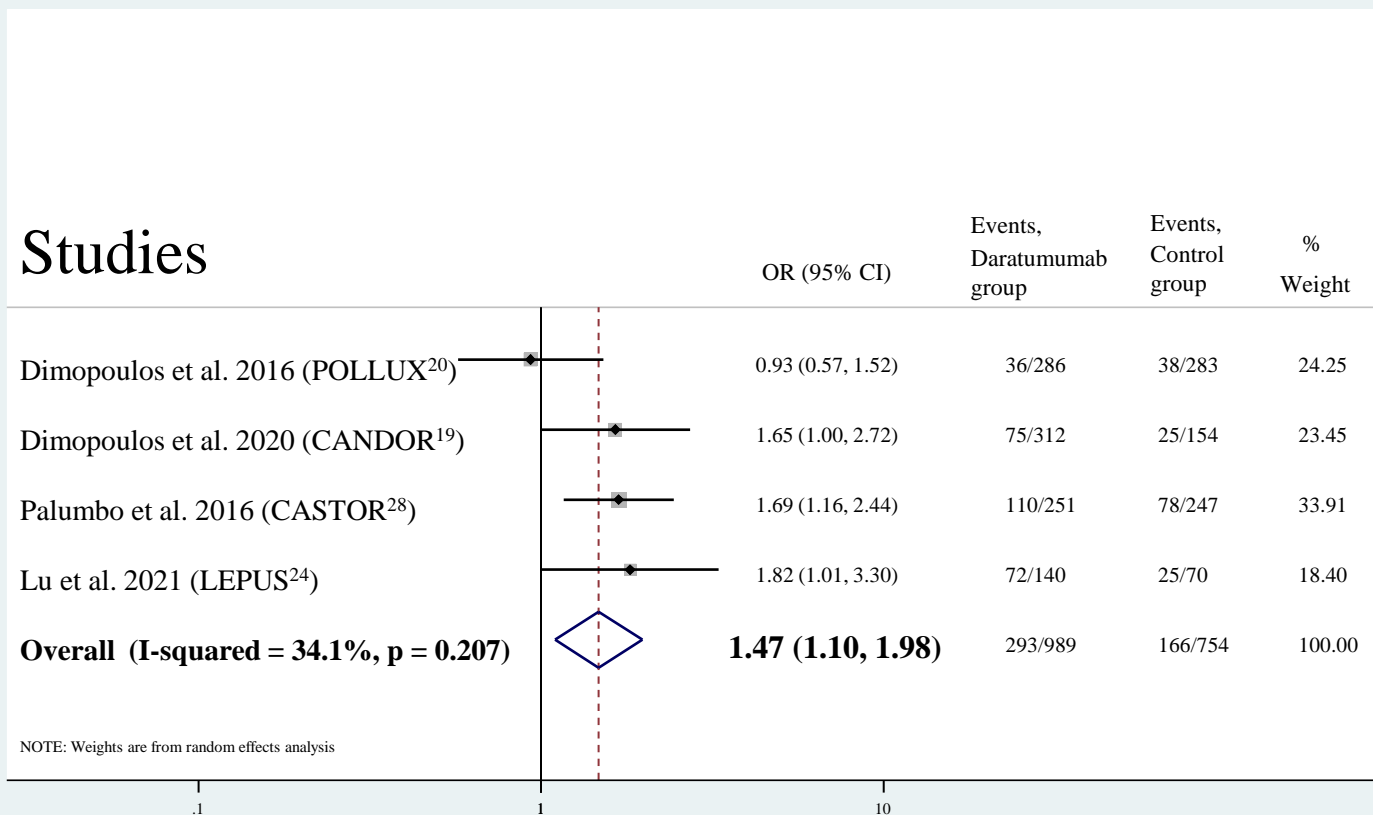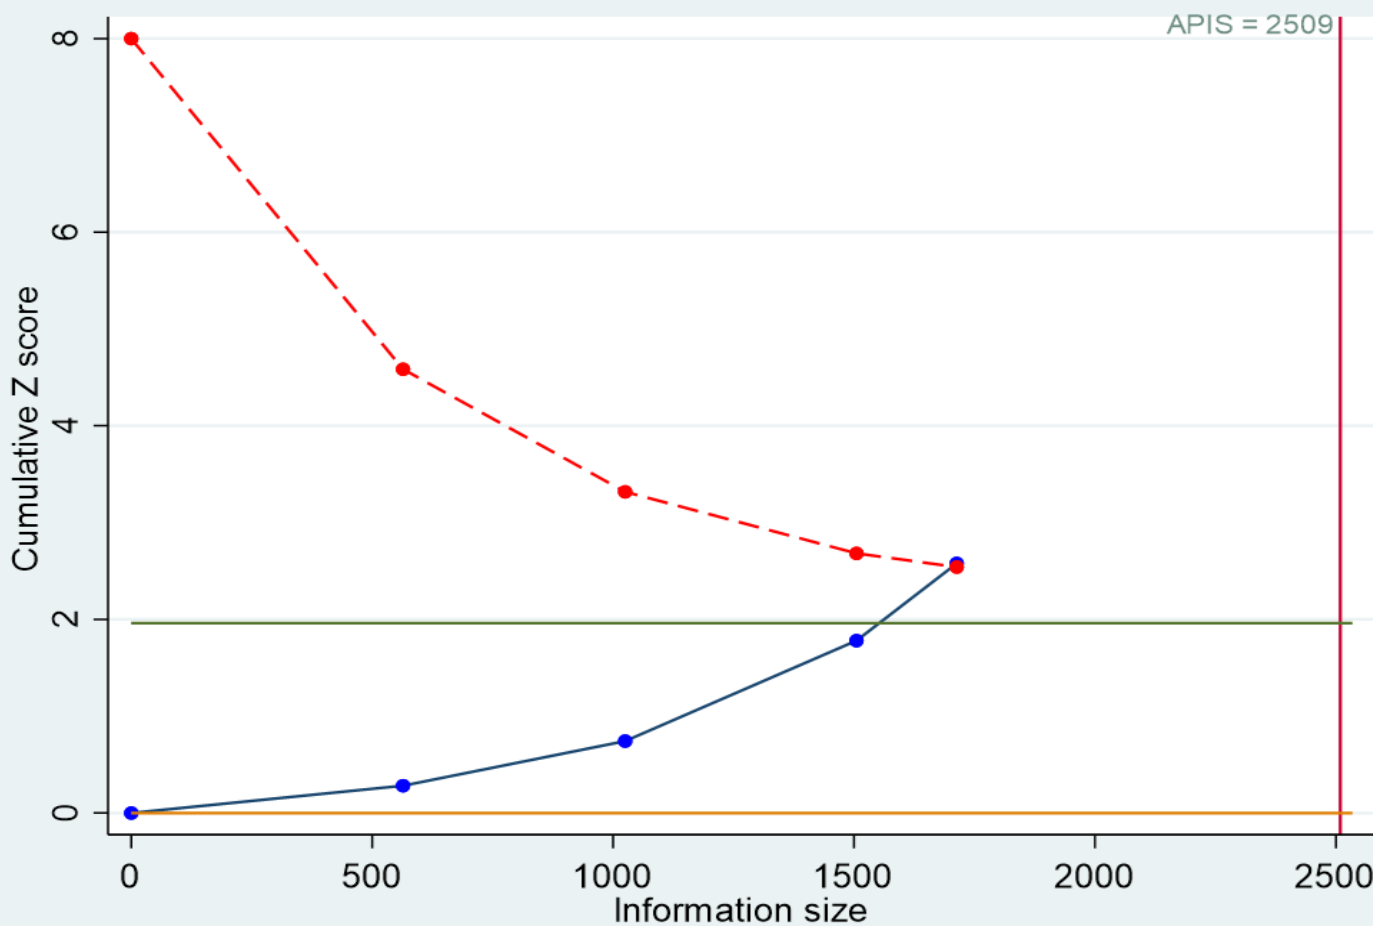

**Supplementary Figure 50: Risk of bias assessment at study level and at domain level regarding grade 3-4 thrombocytopenia in relapsed/refractory multiple myeloma**

KdD, carfilzomib, dexamethasone, and daratumumab; Kd, carfilzomib and dexamethasone; DVd, daratumumab, bortezomib, and dexamethasone; Vd, bortezomib and dexamethasone; DRd, daratumumab, lenalidomide and dexamethasone; Rd, lenalidomide and dexamethasone

| Study                  | Interventions | Randomization process | Deviations from intended interventions | Missing outcome data | Measurement of the outcome | Selection of the reported results | Overall assessment |
|------------------------|---------------|-----------------------|----------------------------------------|----------------------|----------------------------|-----------------------------------|--------------------|
| Lu et al. 2021         | DVd vs Vd     | ?                     | +                                      | +                    | +                          | ?                                 | ?                  |
| Dimopoulos et al. 2020 | KdD vs Kd     | +                     | +                                      | +                    | +                          | +                                 | +                  |
| Palumbo et al. 2016    | DVd vs Vd     | ?                     | +                                      | +                    | +                          | ?                                 | ?                  |
| Dimopoulos et al. 2016 | DRd vs Rd     | +                     | +                                      | +                    | +                          | ?                                 | +                  |

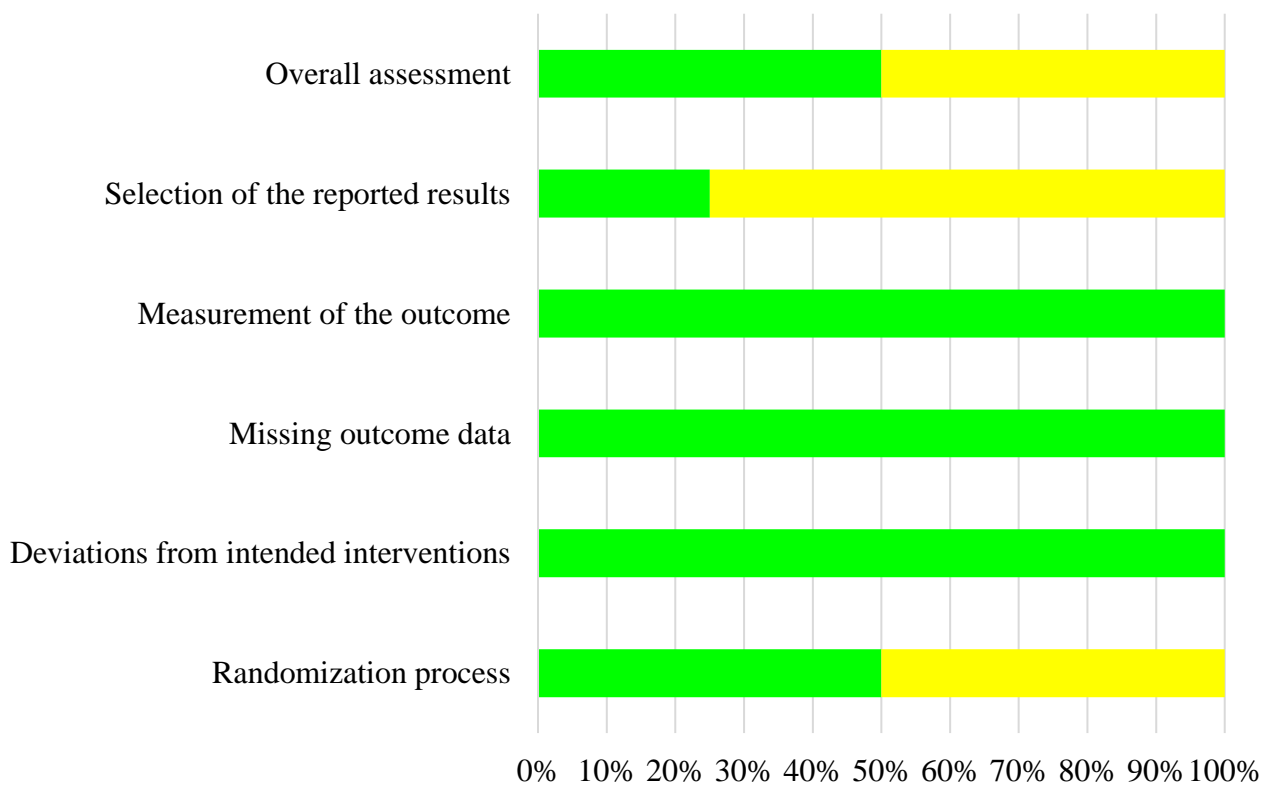

Low risk + Some concerns ? High risk -

**Supplementary Figure 51:** Forest plot and Trial Sequential Analysis representing that addition of daratumumab to backbone therapies does not increase the chance for all grade lymphopenia in relapsed/refractory multiple myeloma

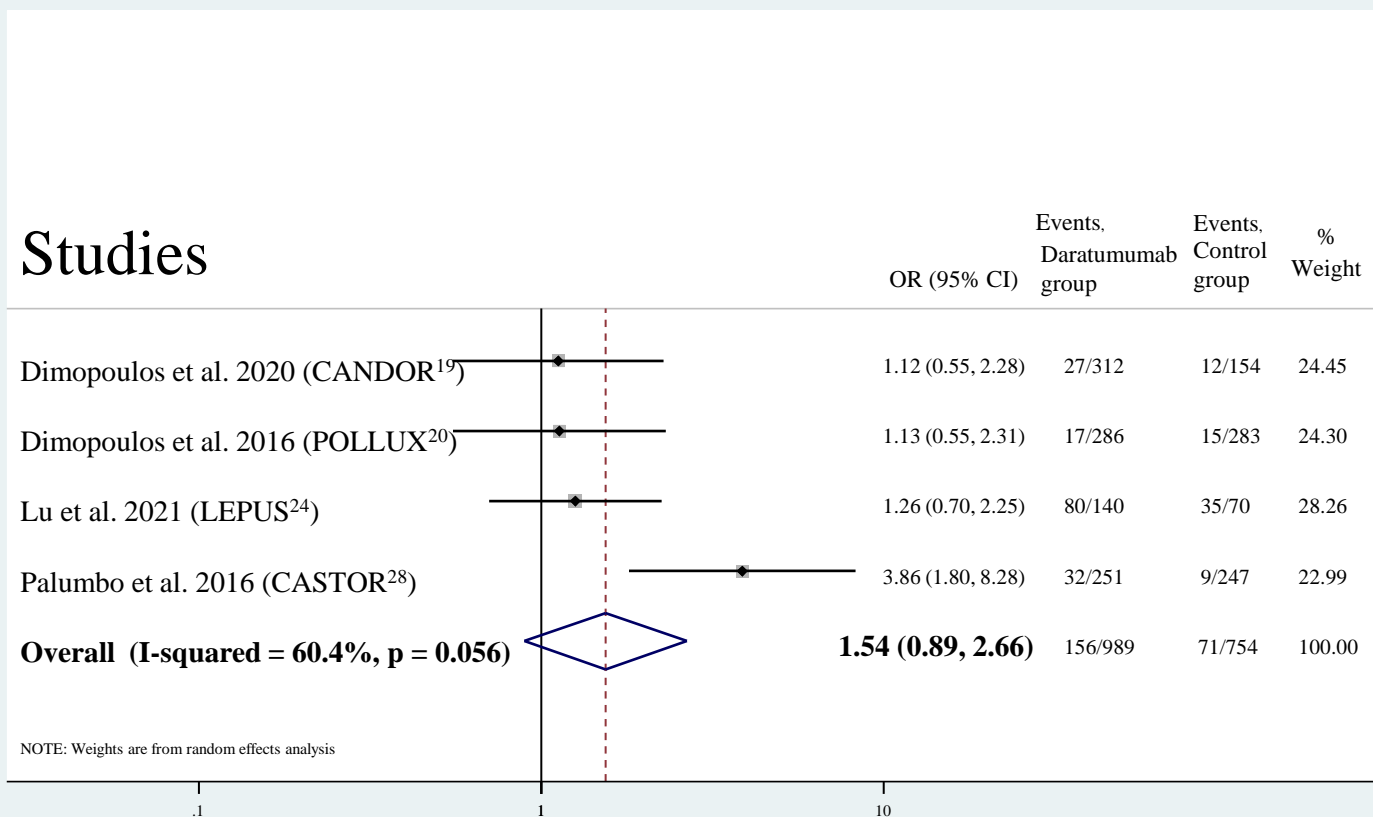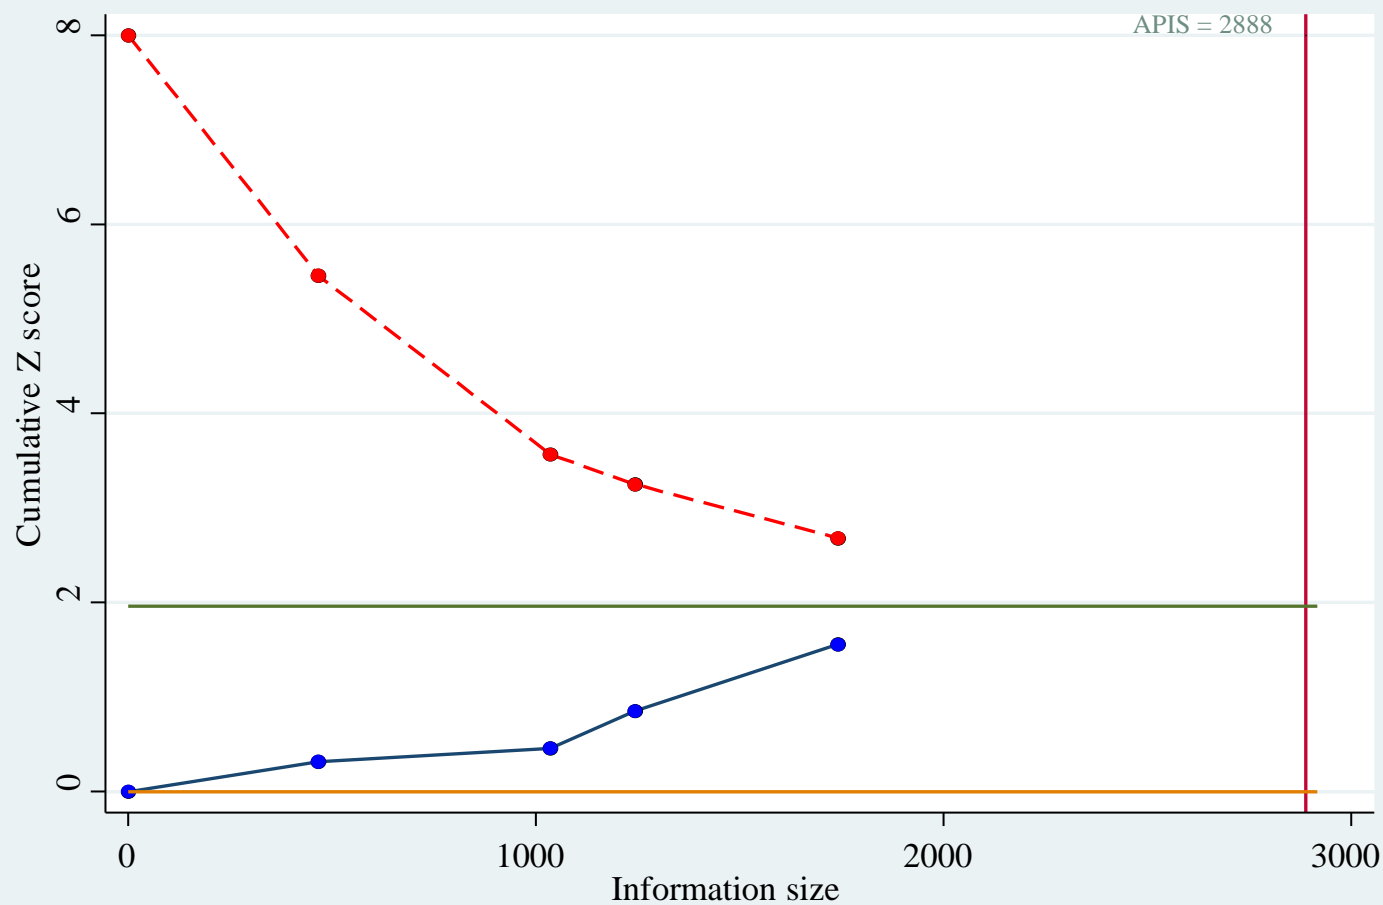

**Supplementary Figure 52: Risk of bias assessment at study level and at domain level regarding all grade lymphopenia in relapsed/refractory multiple myeloma**

KdD, carfilzomib, dexamethasone, and daratumumab; Kd, carfilzomib and dexamethasone; DVd, daratumumab, bortezomib, and dexamethasone; Vd, bortezomib and dexamethasone; DRd, daratumumab, lenalidomide and dexamethasone; Rd, lenalidomide and dexamethasone

| Study                  | Interventions | Randomization process | Deviations from intended interventions | Missing outcome data | Measurement of the outcome | Selection of the reported results | Overall assessment |
|------------------------|---------------|-----------------------|----------------------------------------|----------------------|----------------------------|-----------------------------------|--------------------|
| Lu et al. 2021         | DVd vs Vd     | ?                     | +                                      | +                    | +                          | ?                                 | ?                  |
| Dimopoulos et al. 2020 | KdD vs Kd     | +                     | +                                      | +                    | +                          | +                                 | +                  |
| Palumbo et al. 2016    | DVd vs Vd     | ?                     | +                                      | +                    | +                          | ?                                 | ?                  |
| Dimopoulos et al. 2016 | DRd vs Rd     | +                     | +                                      | +                    | +                          | ?                                 | +                  |

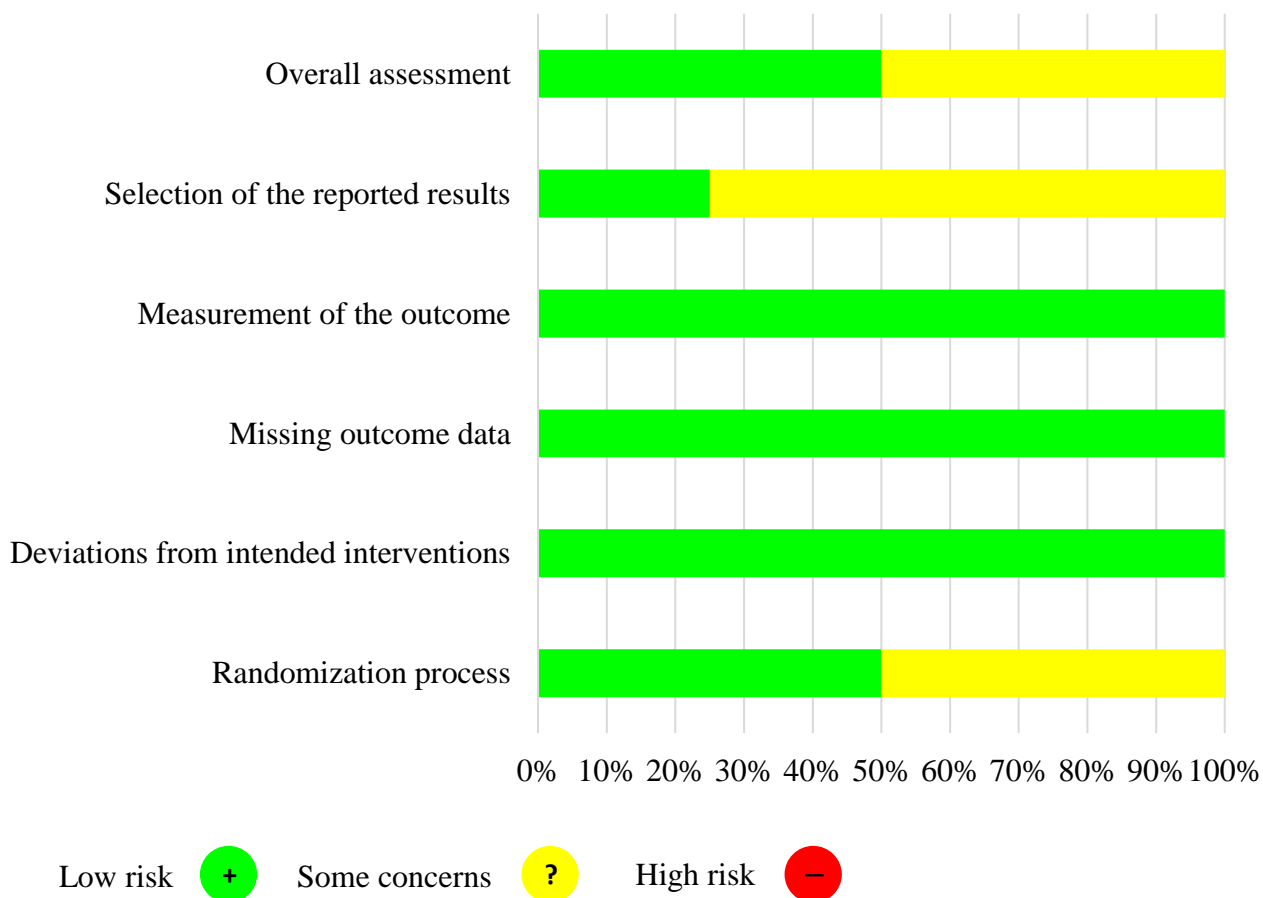



**Supplementary Figure 53:** Forest plot and Trial Sequential Analysis representing that addition of daratumumab to backbone therapies does not increase the chance for grade 3-4 lymphopenia in relapsed/refractory multiple myeloma

## Studies

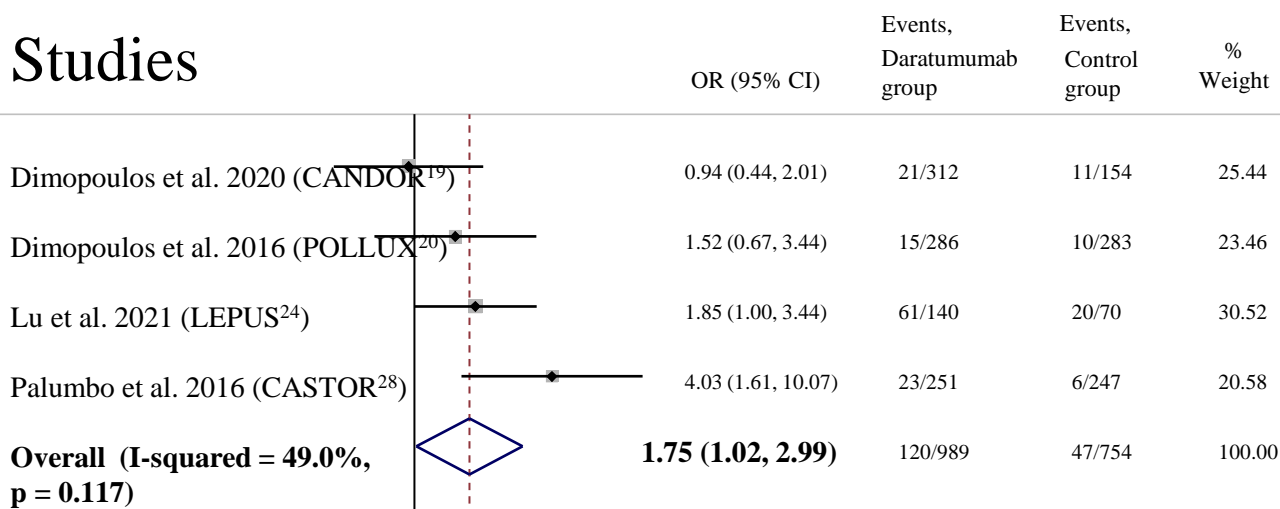

NOTE: Weights are from random effects analysis

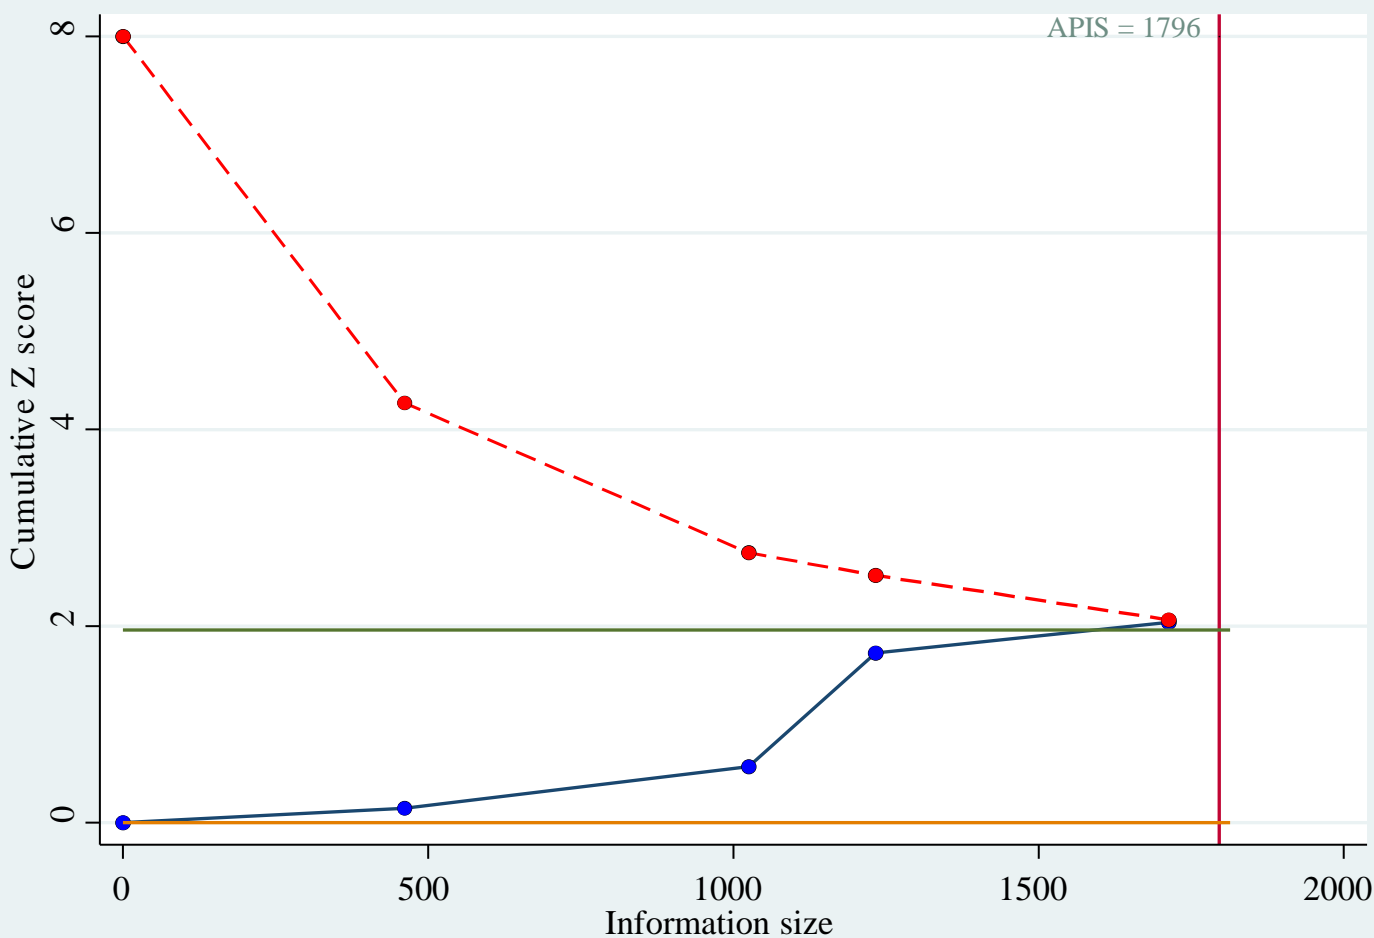

**Supplementary Figure 54: Risk of bias assessment at study level and at domain level regarding grade 3-4 lymphopenia in relapsed/refractory multiple myeloma**

KdD, carfilzomib, dexamethasone, and daratumumab; Kd, carfilzomib and dexamethasone; DVd, daratumumab, bortezomib, and dexamethasone; Vd, bortezomib and dexamethasone; DRd, daratumumab, lenalidomide and dexamethasone; Rd, lenalidomide and dexamethasone

| Study                  | Interventions | Randomization process | Deviations from intended interventions | Missing outcome data | Measurement of the outcome | Selection of the reported results | Overall assessment |
|------------------------|---------------|-----------------------|----------------------------------------|----------------------|----------------------------|-----------------------------------|--------------------|
| Lu et al. 2021         | DVd vs Vd     | ?                     | +                                      | +                    | +                          | ?                                 | ?                  |
| Dimopoulos et al. 2020 | KdD vs Kd     | +                     | +                                      | +                    | +                          | +                                 | +                  |
| Palumbo et al. 2016    | DVd vs Vd     | ?                     | +                                      | +                    | +                          | ?                                 | ?                  |
| Dimopoulos et al. 2016 | DRd vs Rd     | +                     | +                                      | +                    | +                          | ?                                 | +                  |

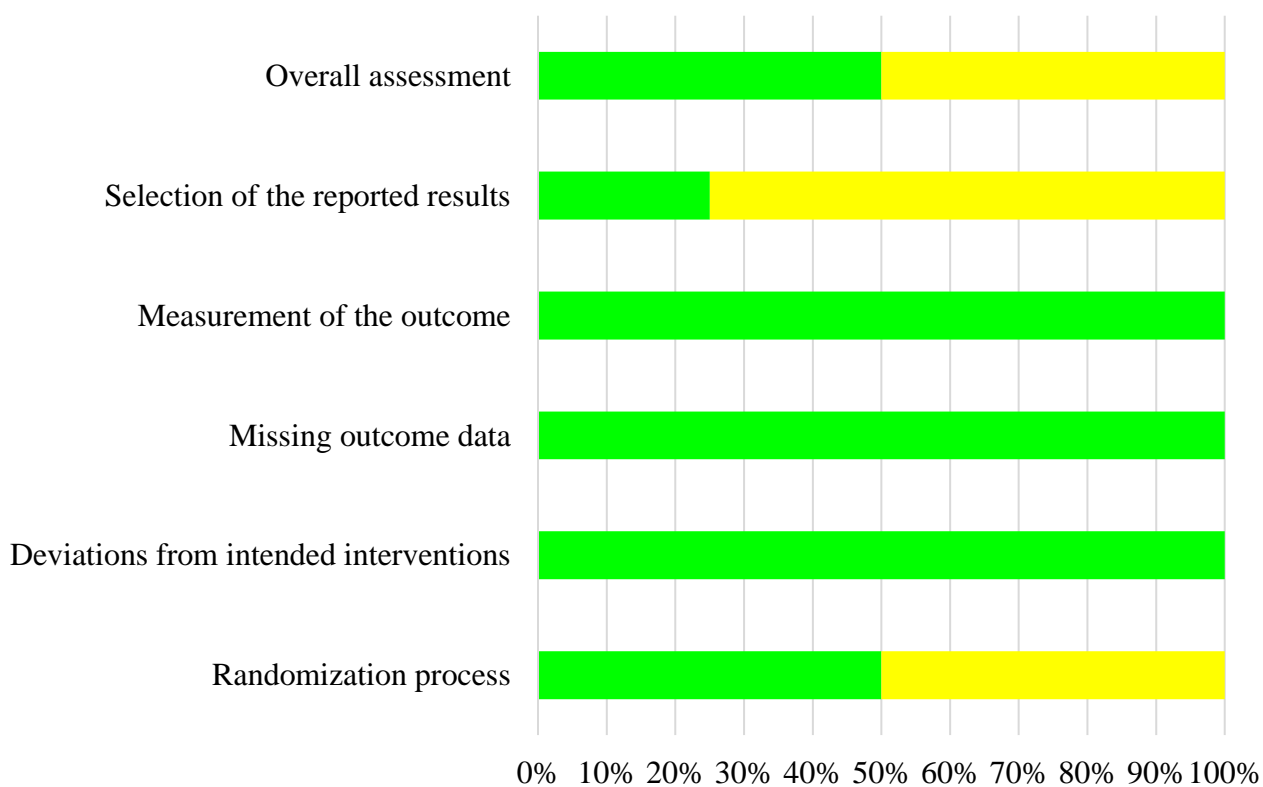

Low risk + Some concerns ? High risk -

**Supplementary Figure 55:** Forest plot and Trial Sequential Analysis representing that addition of daratumumab to backbone therapies increases the chance for all grade neutropenia in relapsed/refractory multiple myeloma

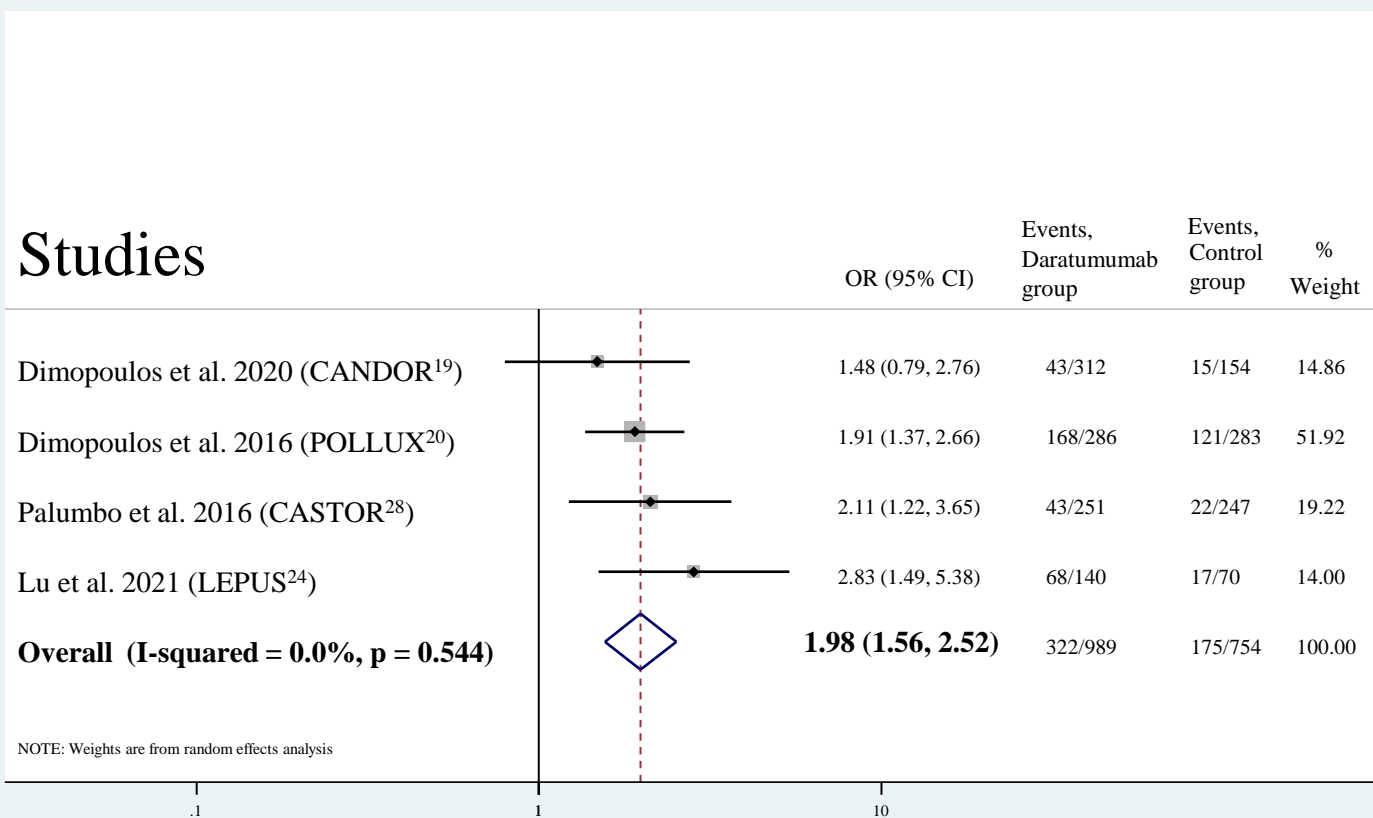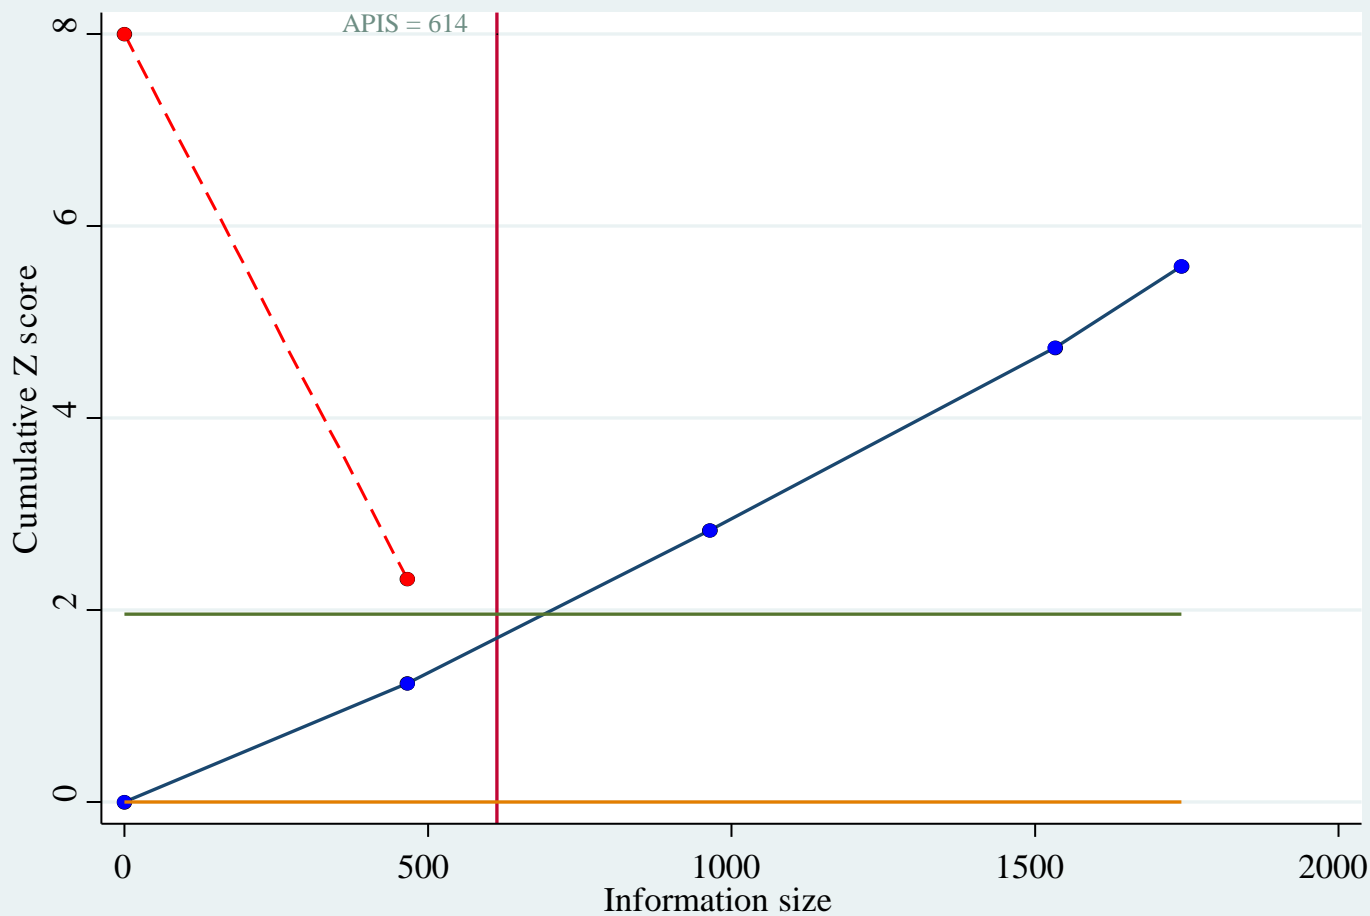

**Supplementary Figure 56: Risk of bias assessment at study level and at domain level regarding all grade neutropenia in relapsed/refractory multiple myeloma**

KdD, carfilzomib, dexamethasone, and daratumumab; Kd, carfilzomib and dexamethasone; DVd, daratumumab, bortezomib, and dexamethasone; Vd, bortezomib and dexamethasone; DRd, daratumumab, lenalidomide and dexamethasone; Rd, lenalidomide and dexamethasone

| Study                  | Interventions | Randomization process | Deviations from intended interventions | Missing outcome data | Measurement of the outcome | Selection of the reported results | Overall assessment |
|------------------------|---------------|-----------------------|----------------------------------------|----------------------|----------------------------|-----------------------------------|--------------------|
| Lu et al. 2021         | DVd vs Vd     | ?                     | +                                      | +                    | +                          | ?                                 | ?                  |
| Dimopoulos et al. 2020 | KdD vs Kd     | +                     | +                                      | +                    | +                          | +                                 | +                  |
| Palumbo et al. 2016    | DVd vs Vd     | ?                     | +                                      | +                    | +                          | ?                                 | ?                  |
| Dimopoulos et al. 2016 | DRd vs Rd     | +                     | +                                      | +                    | +                          | ?                                 | +                  |

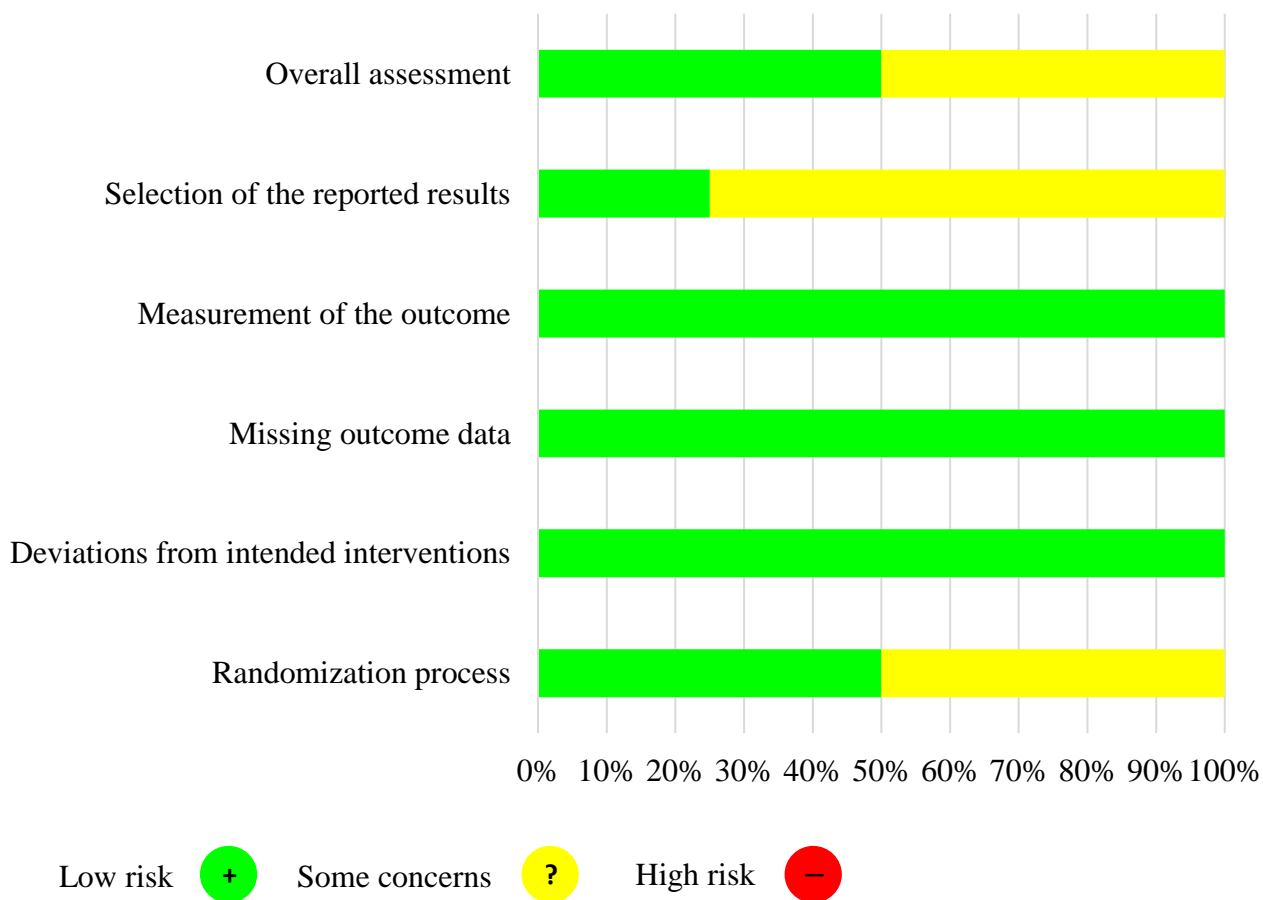

**Supplementary Figure 57:** Forest plot and Trial Sequential Analysis representing that addition of daratumumab to backbone therapies does not increase the chance for grade 3-4 neutropenia in relapsed/refractory multiple myeloma

## Studies

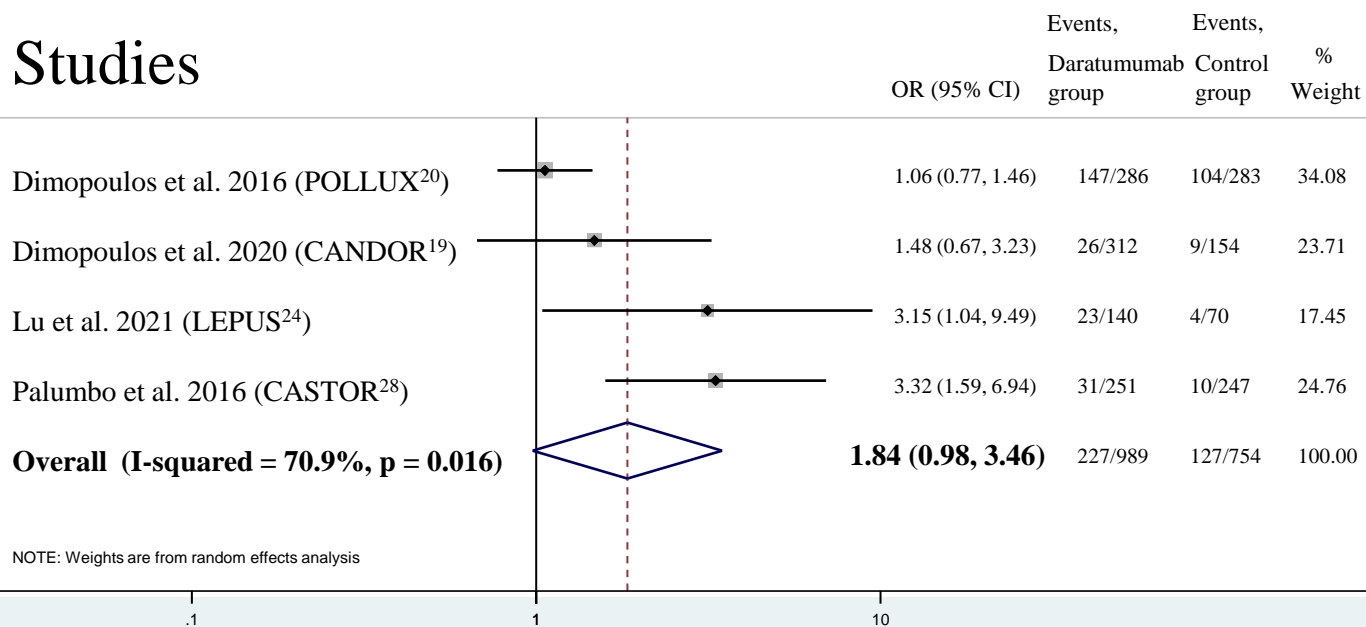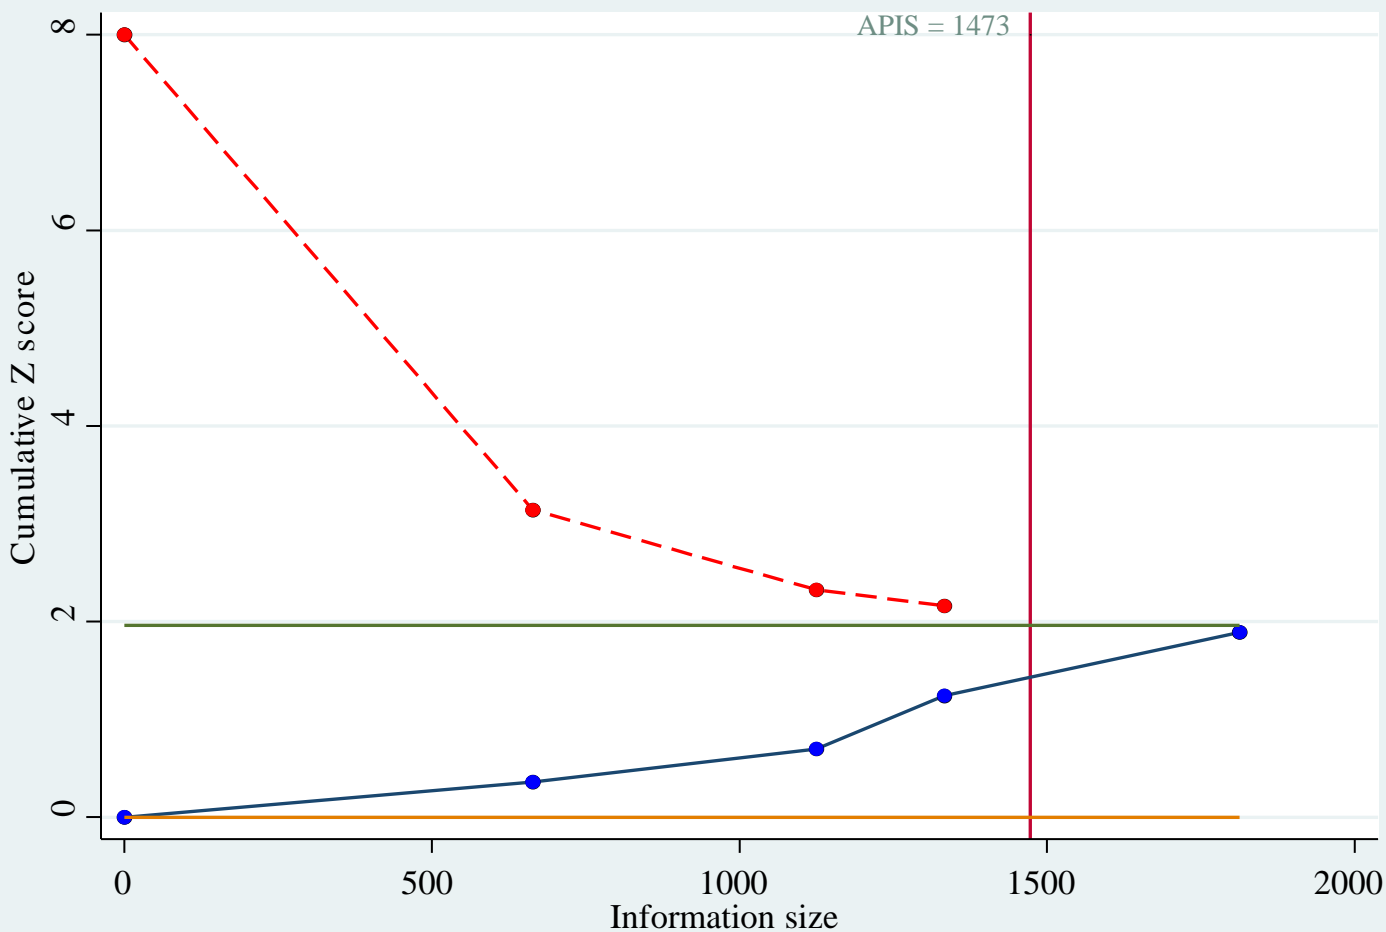

**Supplementary Figure 58: Risk of bias assessment at study level and at domain level regarding grade 3-4 neutropenia in relapsed/refractory multiple myeloma**

KdD, carfilzomib, dexamethasone, and daratumumab; Kd, carfilzomib and dexamethasone; DVd, daratumumab, bortezomib, and dexamethasone; Vd, bortezomib and dexamethasone; DRd, daratumumab, lenalidomide and dexamethasone; Rd, lenalidomide and dexamethasone

| Study                  | Interventions | Randomization process | Deviations from intended interventions | Missing outcome data | Measurement of the outcome | Selection of the reported results | Overall assessment |
|------------------------|---------------|-----------------------|----------------------------------------|----------------------|----------------------------|-----------------------------------|--------------------|
| Lu et al. 2021         | DVd vs Vd     | ?                     | +                                      | +                    | +                          | ?                                 | ?                  |
| Dimopoulos et al. 2020 | KdD vs Kd     | +                     | +                                      | +                    | +                          | +                                 | +                  |
| Palumbo et al. 2016    | DVd vs Vd     | ?                     | +                                      | +                    | +                          | ?                                 | ?                  |
| Dimopoulos et al. 2016 | DRd vs Rd     | +                     | +                                      | +                    | +                          | ?                                 | +                  |

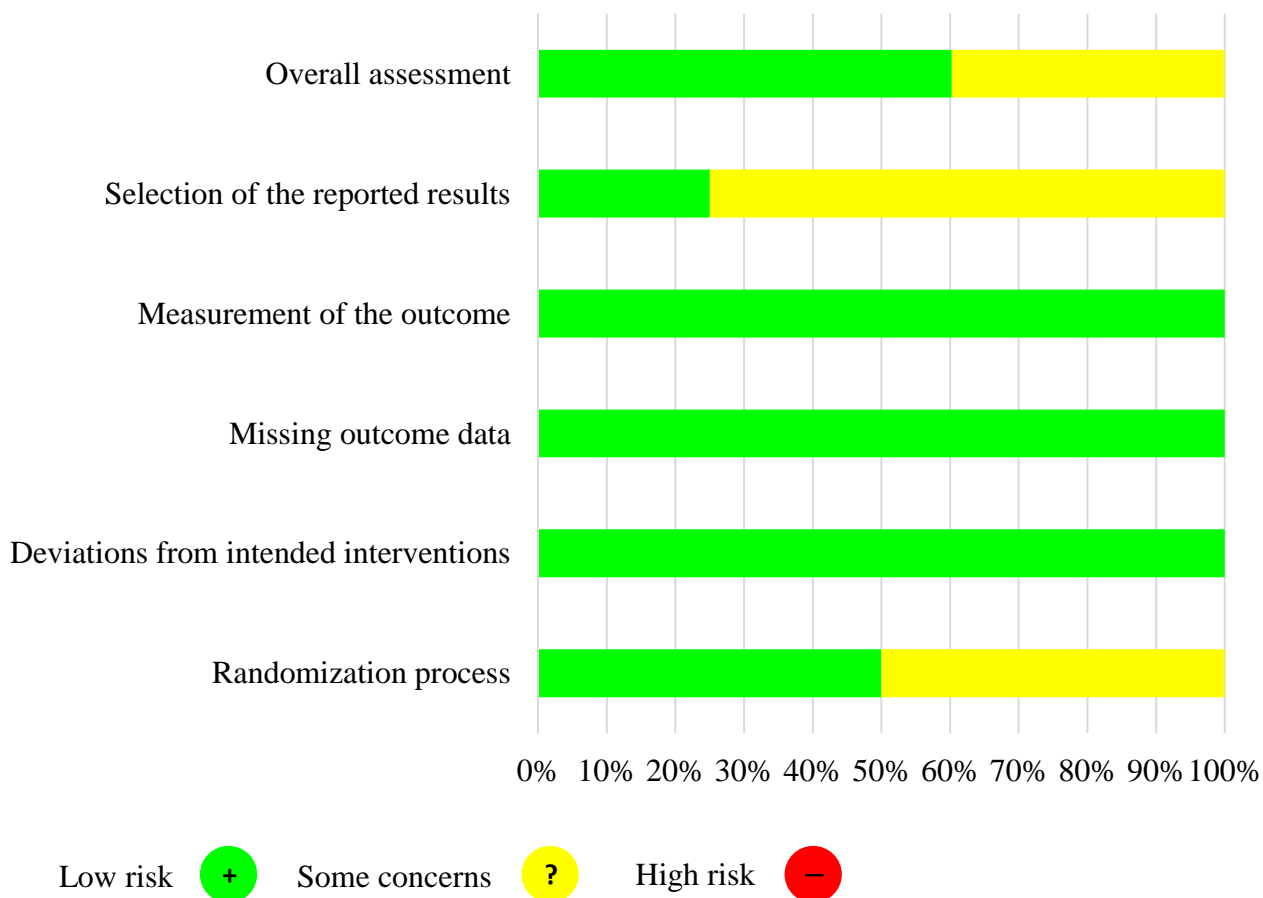

**Supplementary Figure 59:** Forest plot and Trial Sequential Analysis representing that addition of daratumumab to backbone therapies does not increase the chance for all grade anaemia relapsed/refractory multiple myeloma

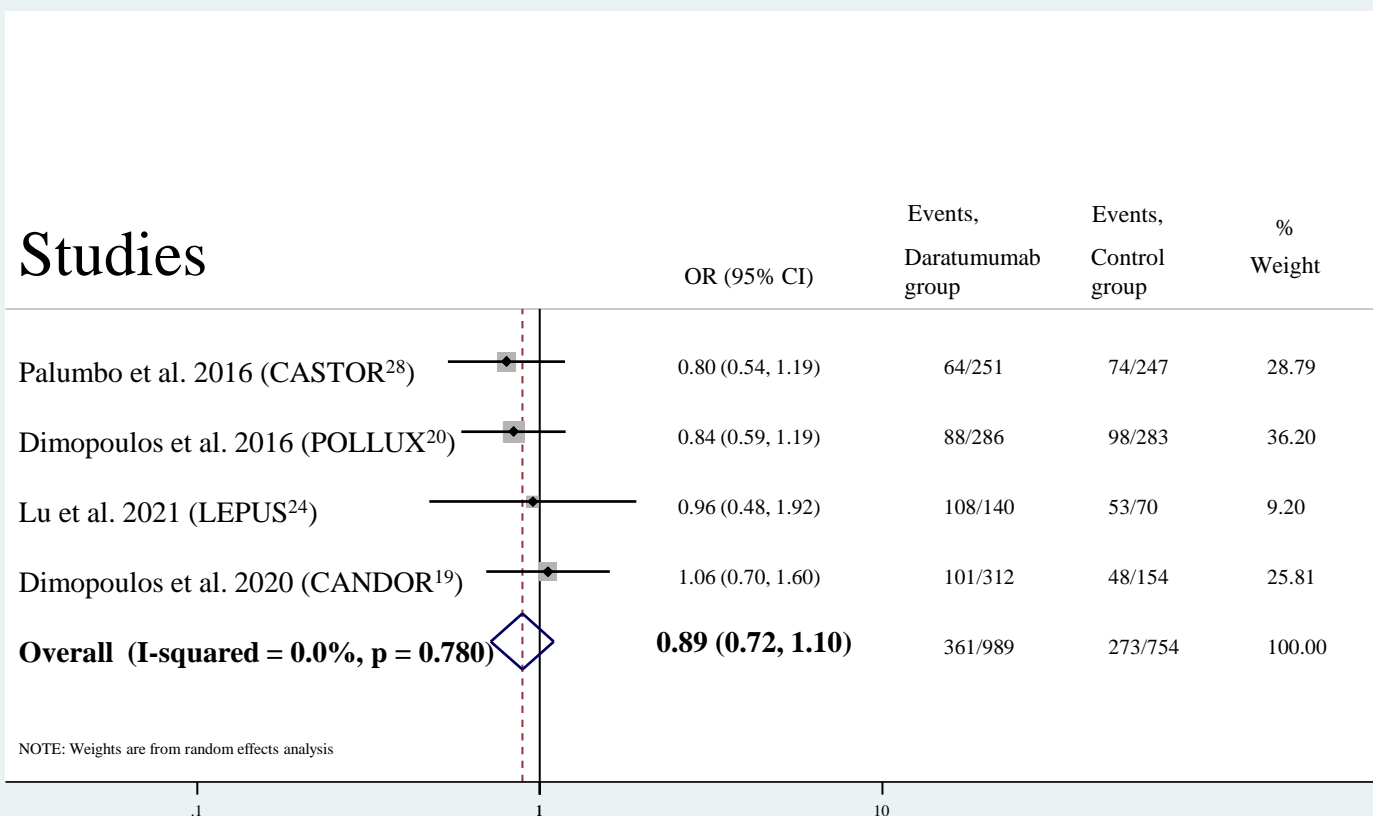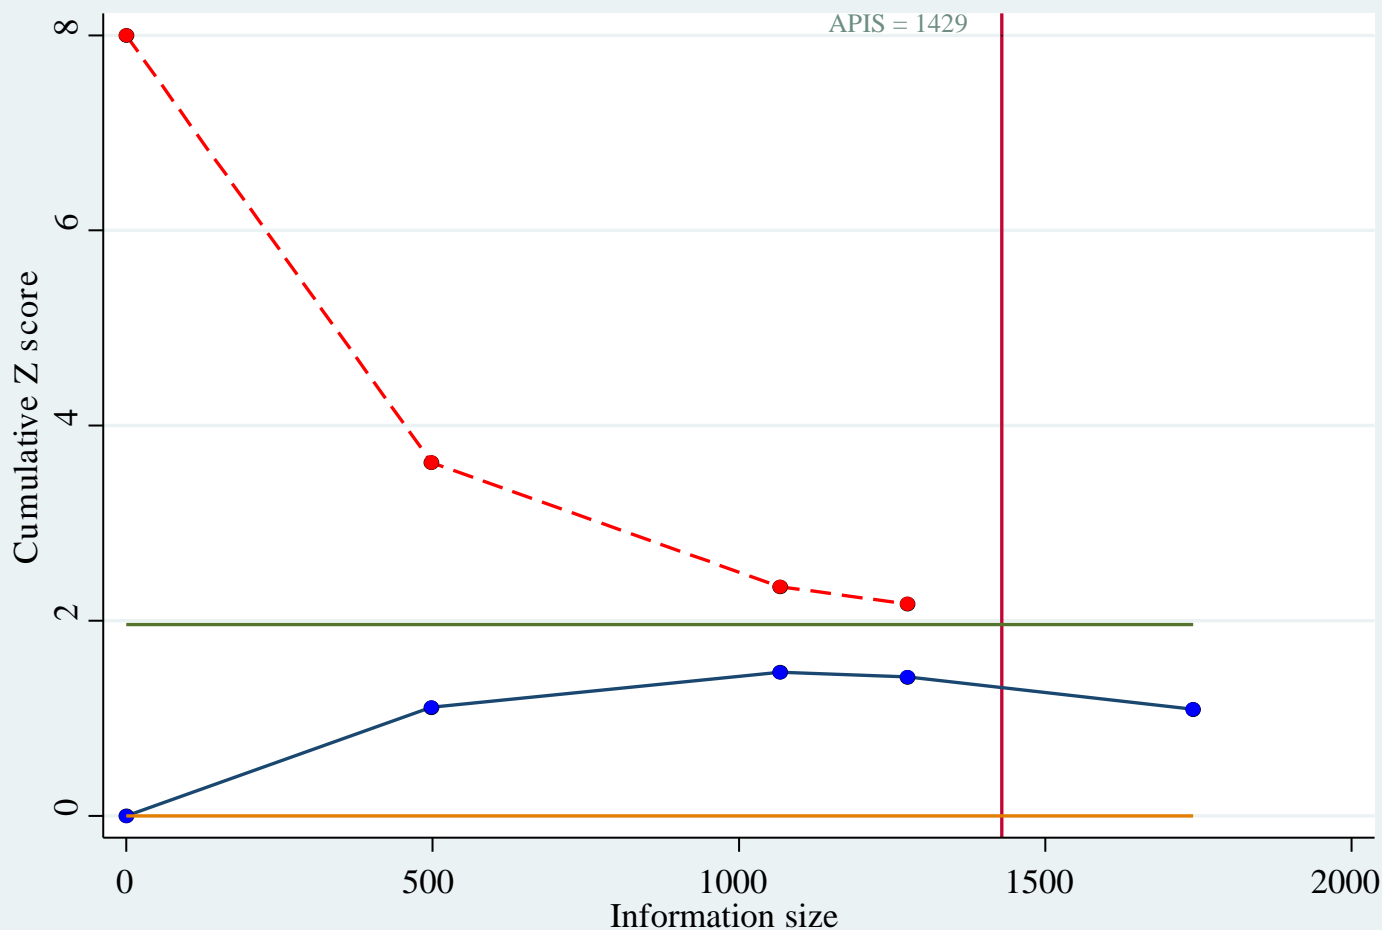

**Supplementary Figure 60:** Risk of bias assessment at study level and at domain level regarding all grade anaemia in relapsed/refractory multiple myeloma

KdD, carfilzomib, dexamethasone, and daratumumab; Kd, carfilzomib and dexamethasone; DVd, daratumumab, bortezomib, and dexamethasone; Vd, bortezomib and dexamethasone; DRd, daratumumab, lenalidomide and dexamethasone; Rd, lenalidomide and dexamethasone

| Study                  | Interventions | Randomization process | Deviations from intended interventions | Missing outcome data | Measurement of the outcome | Selection of the reported results | Overall assessment |
|------------------------|---------------|-----------------------|----------------------------------------|----------------------|----------------------------|-----------------------------------|--------------------|
| Lu et al. 2021         | DVd vs Vd     | ?                     | +                                      | +                    | +                          | ?                                 | ?                  |
| Dimopoulos et al. 2020 | KdD vs Kd     | +                     | +                                      | +                    | +                          | +                                 | +                  |
| Palumbo et al. 2016    | DVd vs Vd     | ?                     | +                                      | +                    | +                          | ?                                 | ?                  |
| Dimopoulos et al. 2016 | DRd vs Rd     | +                     | +                                      | +                    | +                          | ?                                 | +                  |

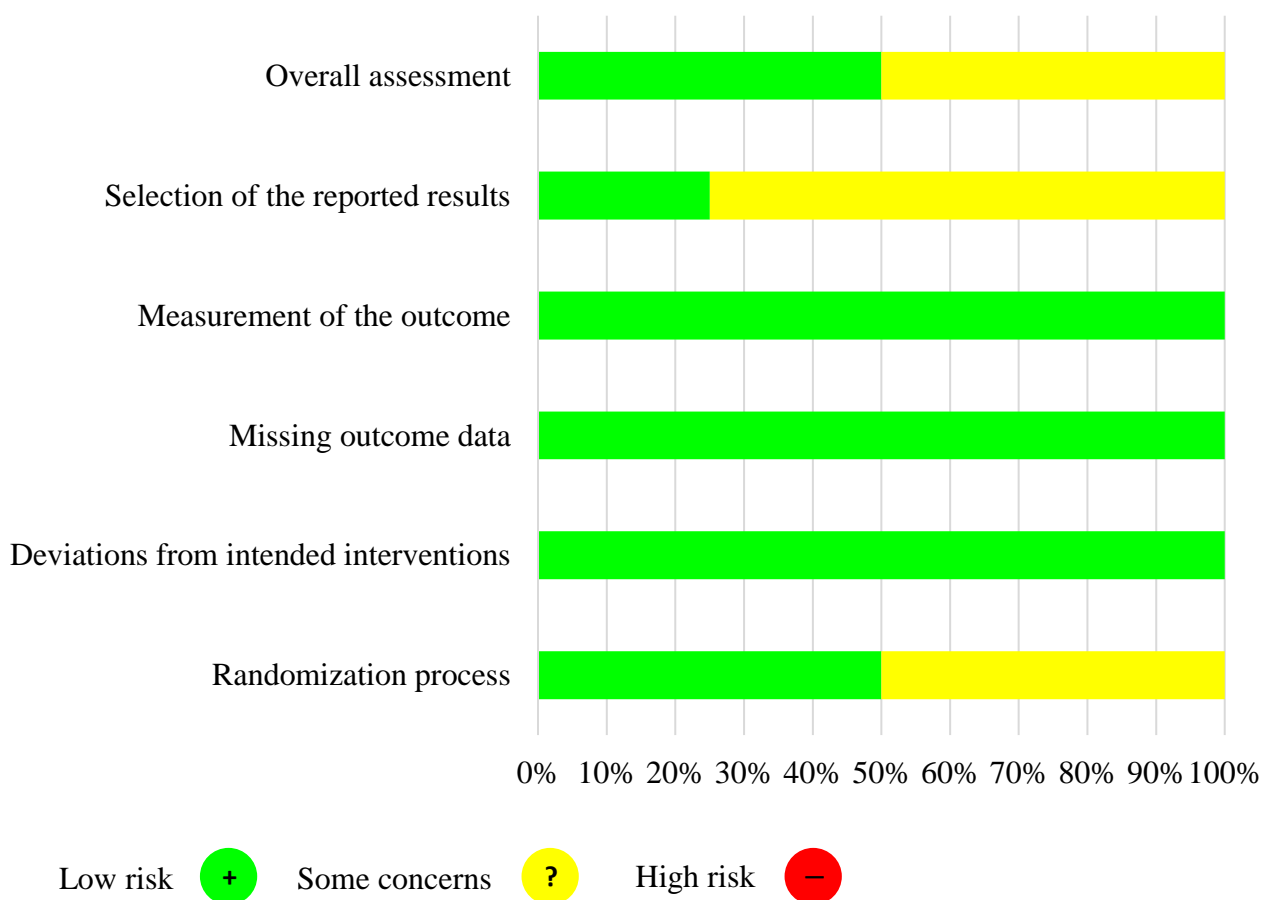



**Supplementary Figure 61:** Forest plot and Trial Sequential Analysis representing that addition of daratumumab to backbone therapies does not increase the chance for grade 3-4 anaemia relapsed/refractory multiple myeloma

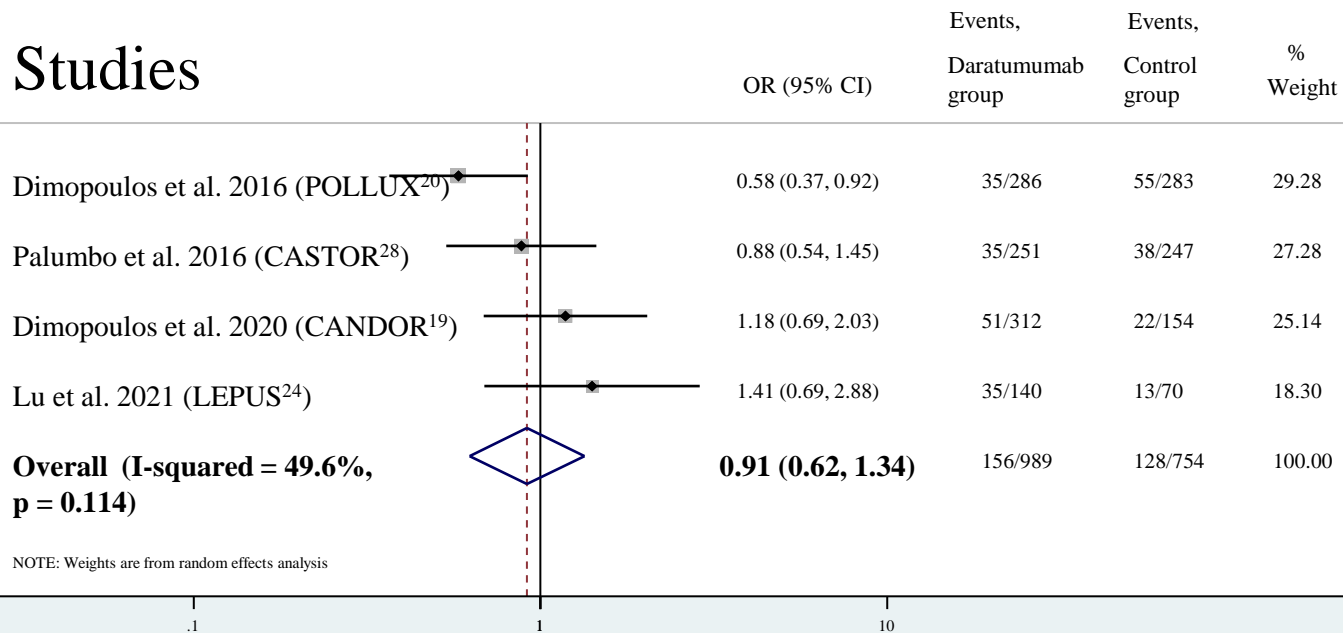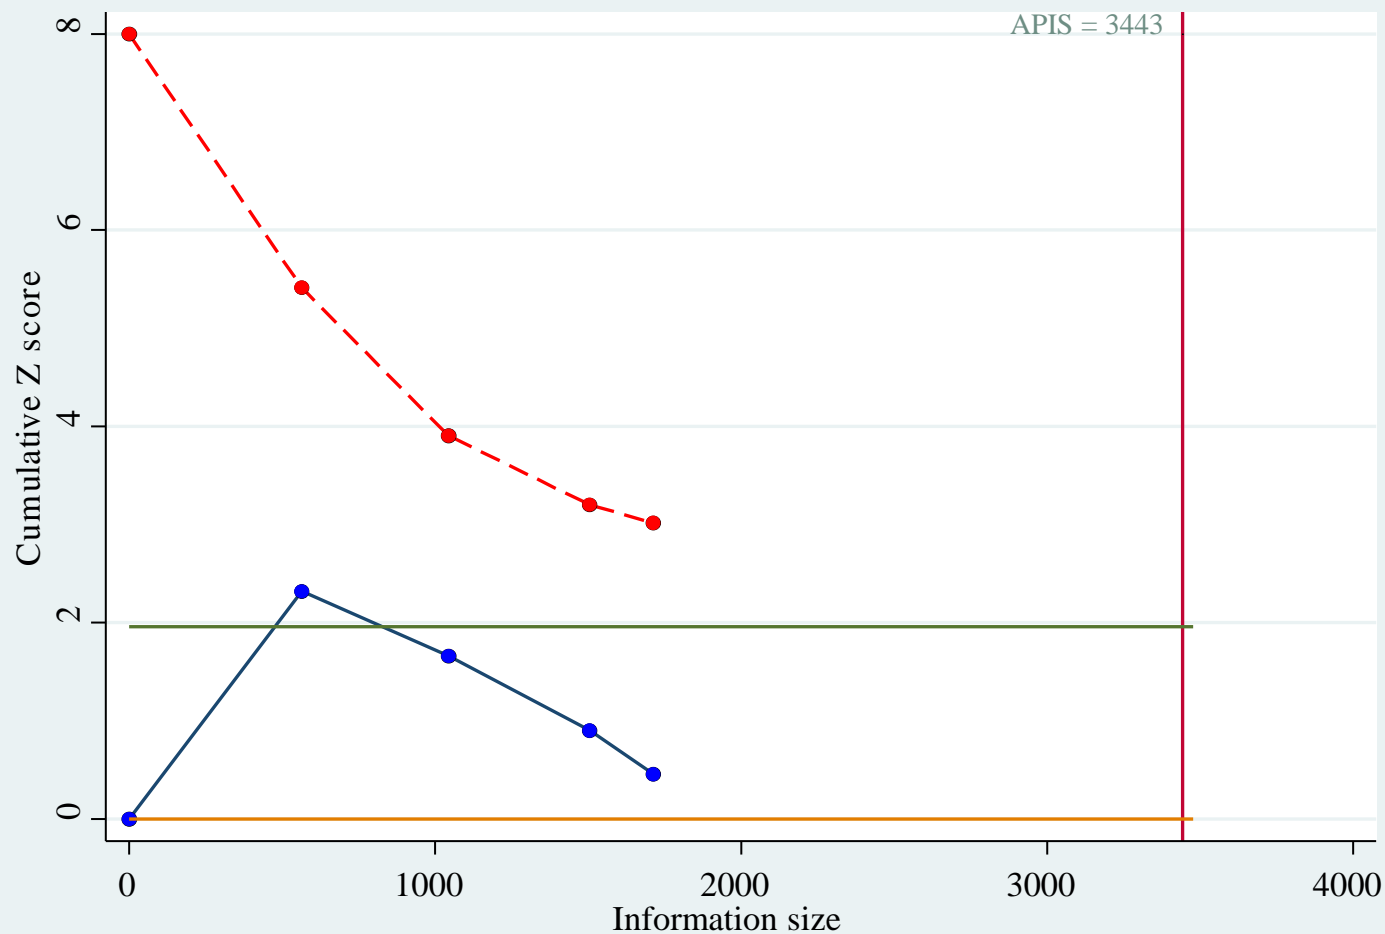

**Supplementary Figure 62:** Risk of bias assessment at study level and at domain level regarding grade 3-4 anaemia in relapsed/refractory multiple myeloma

KdD, carfilzomib, dexamethasone, and daratumumab; Kd, carfilzomib and dexamethasone; DVd, daratumumab, bortezomib, and dexamethasone; Vd, bortezomib and dexamethasone; DRd, daratumumab, lenalidomide and dexamethasone; Rd, lenalidomide and dexamethasone

| Study                  | Interventions | Randomization process | Deviations from intended interventions | Missing outcome data | Measurement of the outcome | Selection of the reported results | Overall assessment |
|------------------------|---------------|-----------------------|----------------------------------------|----------------------|----------------------------|-----------------------------------|--------------------|
| Lu et al. 2021         | DVd vs Vd     | ?                     | +                                      | +                    | +                          | ?                                 | ?                  |
| Dimopoulos et al. 2020 | KdD vs Kd     | +                     | +                                      | +                    | +                          | +                                 | +                  |
| Palumbo et al. 2016    | DVd vs Vd     | ?                     | +                                      | +                    | +                          | ?                                 | ?                  |
| Dimopoulos et al. 2016 | DRd vs Rd     | +                     | +                                      | +                    | +                          | ?                                 | +                  |

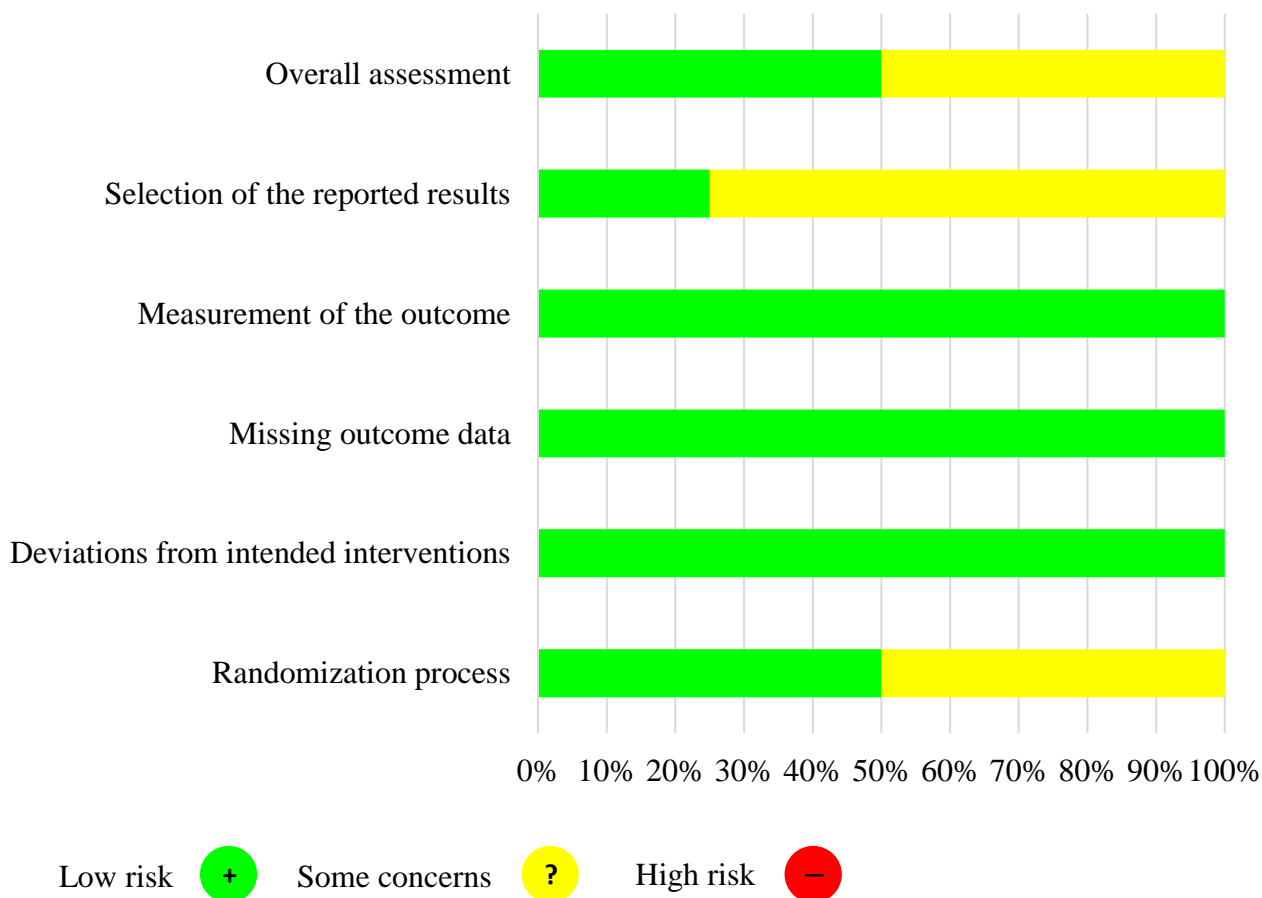

**Supplementary Figure 63:** Forest plot and Trial Sequential Analysis representing that addition of daratumumab to backbone therapies does not increase the chance for all grade hypertension in relapsed/refractory multiple myeloma

## Studies

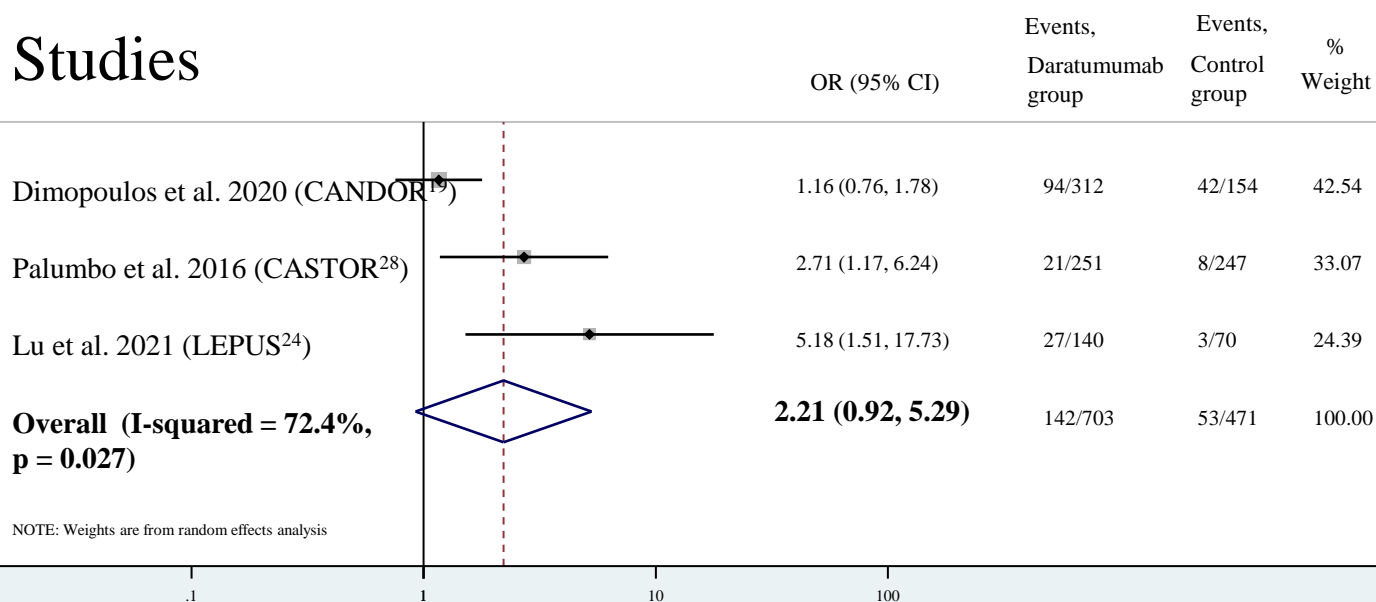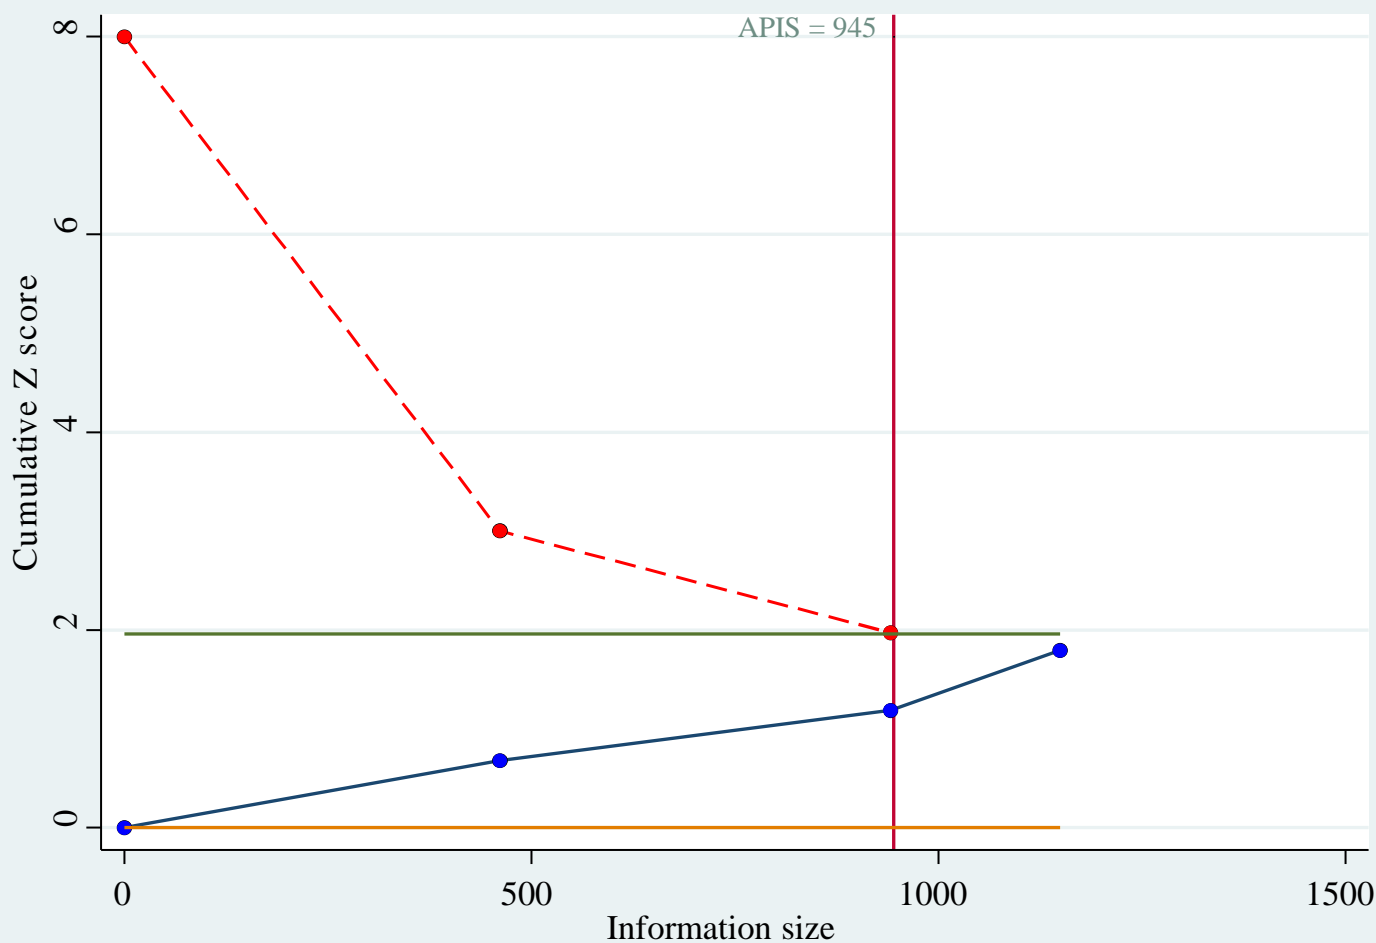

**Supplementary Figure 64:** Risk of bias assessment at study level and at domain level regarding all grade hypertension in relapsed/refractory multiple myeloma

DVd, daratumumab, bortezomib, and dexamethasone; Vd, bortezomib and dexamethasone; DRd, daratumumab, lenalidomide and dexamethasone; Rd, lenalidomide and dexamethasone

| Study                  | Interventions | Randomization process | Deviations from intended interventions | Missing outcome data | Measurement of the outcome | Selection of the reported results | Overall assessment |
|------------------------|---------------|-----------------------|----------------------------------------|----------------------|----------------------------|-----------------------------------|--------------------|
| Lu et al. 2021         | DVd vs Vd     | ?                     | +                                      | +                    | +                          | ?                                 | ?                  |
| Dimopoulos et al. 2020 | DRd vs Rd     | +                     | +                                      | +                    | +                          | +                                 | +                  |
| Palumbo et al. 2016    | DVd vs Vd     | ?                     | +                                      | +                    | +                          | ?                                 | ?                  |

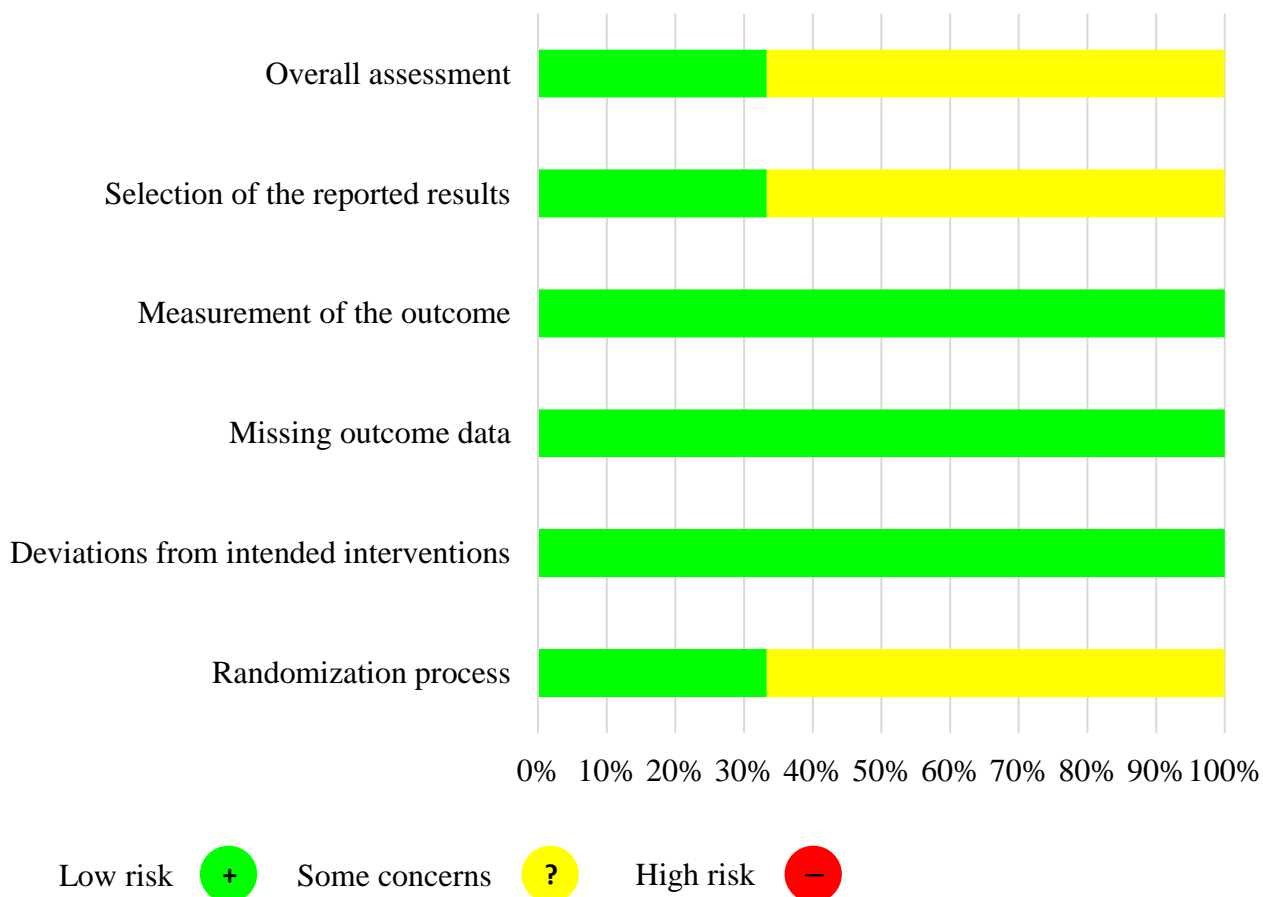

**Supplementary Figure 65:** Forest plot and Trial Sequential Analysis representing that addition of daratumumab to backbone therapies does not increase the chance for grade 3-4 hypertension in relapsed/refractory multiple myeloma

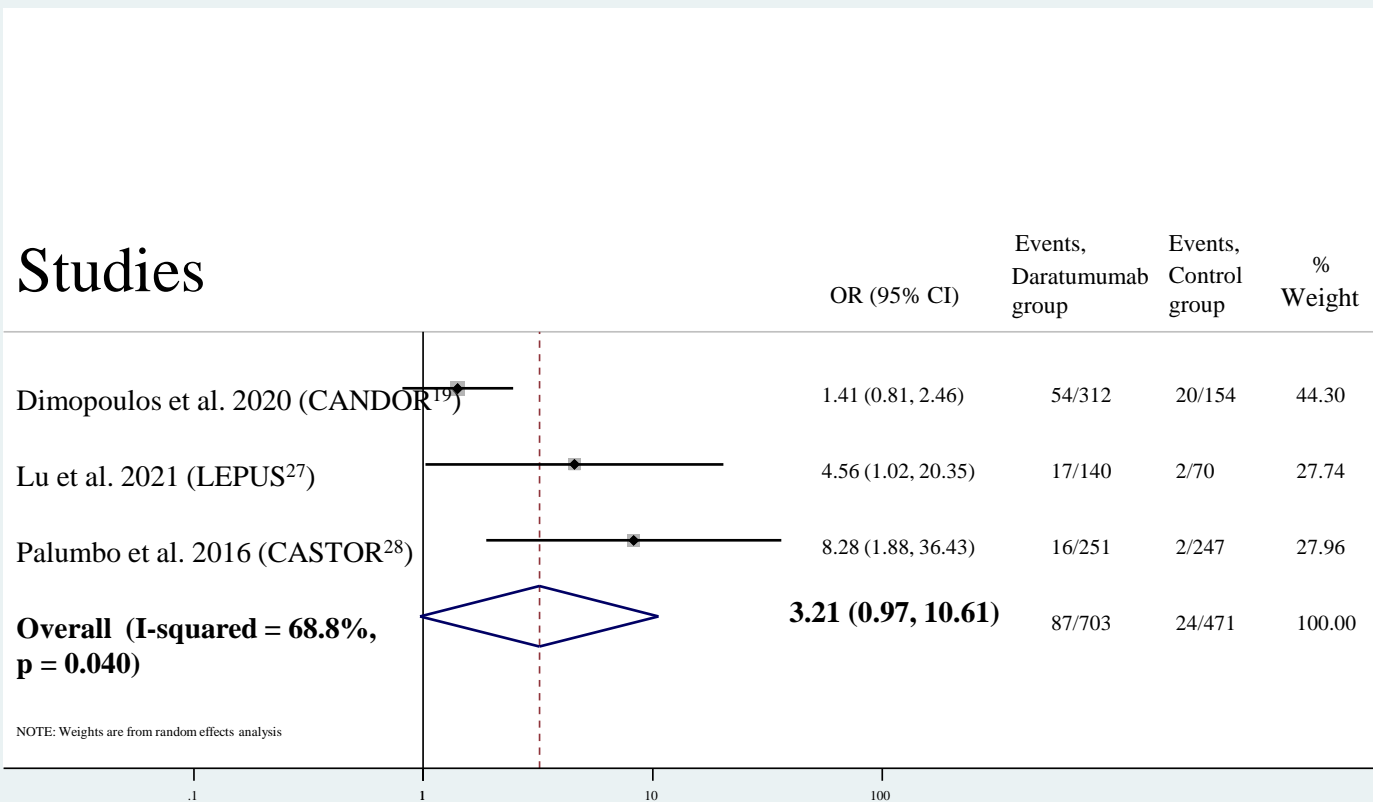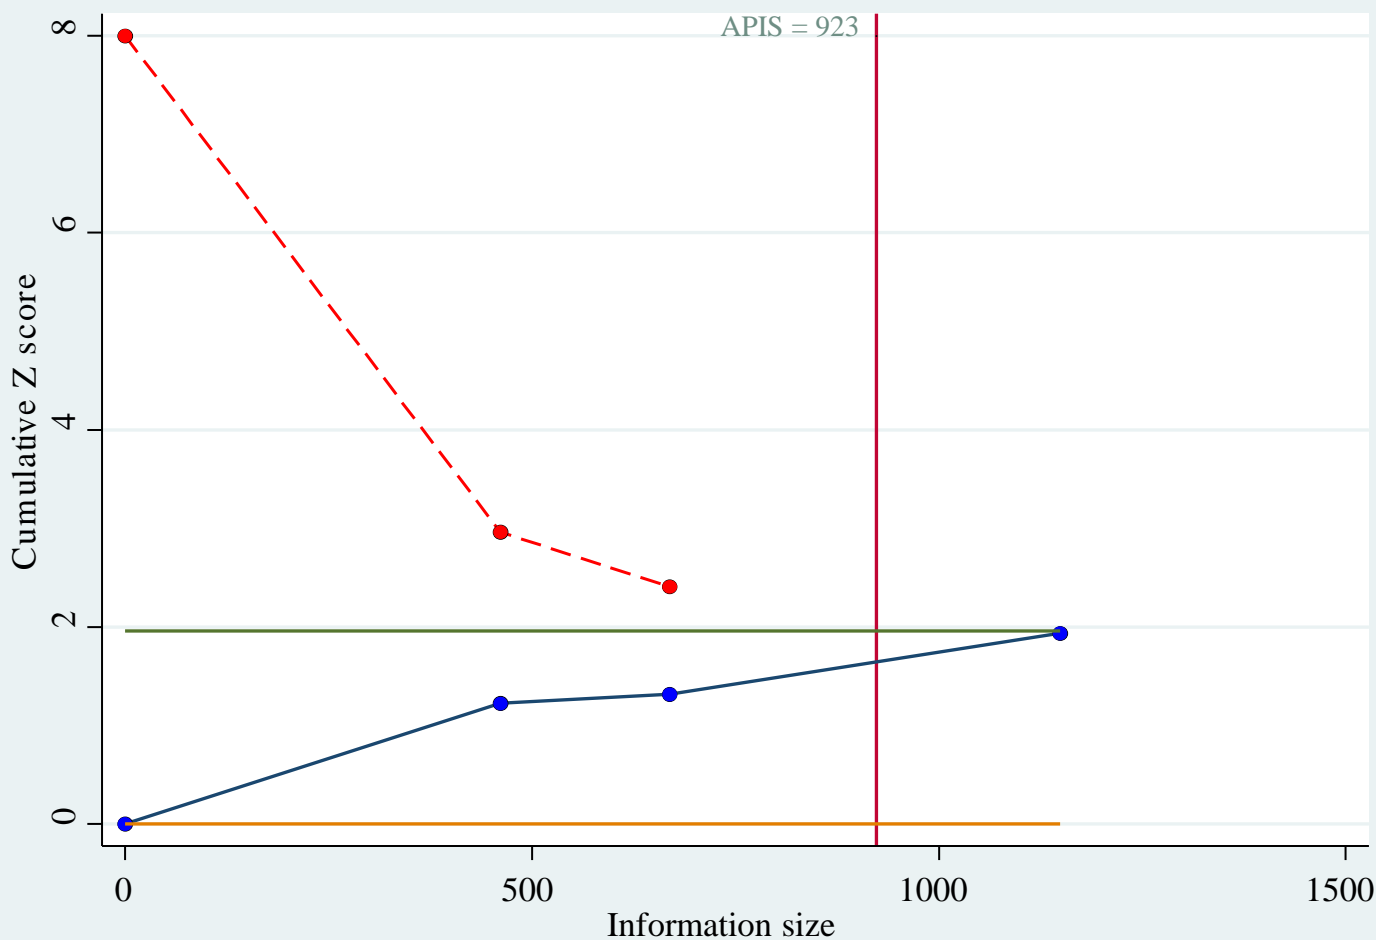

**Supplementary Figure 66: Risk of bias assessment at study level and at domain level regarding grade 3-4 hypertension in relapsed/refractory multiple myeloma**

DVd, daratumumab, bortezomib, and dexamethasone; Vd, bortezomib and dexamethasone; DRd, daratumumab, lenalidomide and dexamethasone; Rd, lenalidomide and dexamethasone

| Study                  | Interventions | Randomization process | Deviations from intended interventions | Missing outcome data | Measurement of the outcome | Selection of the reported results | Overall assessment |
|------------------------|---------------|-----------------------|----------------------------------------|----------------------|----------------------------|-----------------------------------|--------------------|
| Lu et al. 2021         | DVd vs Vd     | ?                     | +                                      | +                    | +                          | ?                                 | ?                  |
| Dimopoulos et al. 2020 | DRd vs Rd     | +                     | +                                      | +                    | +                          | +                                 | +                  |
| Palumbo et al. 2016    | DVd vs Vd     | ?                     | +                                      | +                    | +                          | ?                                 | ?                  |



Supplement: 41598_2021_1440_MOESM1_ESM.pdf [file 41598_2021_1440_MOESM1_ESM.pdf]
