# Supplementary material for: Addition of daratumumab to multiple myeloma backbone regimens significantly improves clinical outcomes: a systematic review and meta-analysis of randomised controlled trials
Source: PubMed Central journal article supplement (PMC8578422; doi:10.1038/s41598-021-01440-x), 2021-11-09
Supplement: 41598_2021_1440_MOESM2_ESM.pdf [file 41598_2021_1440_MOESM2_ESM.pdf]

# Appendix B

Summary: This document contains certainty of evidence assessment using the GRADE Approach.

## **Addition of daratumumab to multiple myeloma backbone regimens: A systematic review and meta-analysis of randomised controlled trials**

**Szabolcs Kiss<sup>1</sup>, Noémi Gede<sup>2</sup>, Péter Hegyi<sup>3</sup>, Bettina Nagy<sup>2</sup>, Rita Deák<sup>2</sup>, Fanni Dembrovszky<sup>2</sup>, Stefania Bunduc<sup>4</sup>, Bálint Erőss<sup>2</sup>, Tamás Leiner<sup>5</sup>, Zsolt Szakács<sup>6</sup> #, Hussain Alizadeh<sup>6</sup> #\***

<sup>1</sup>Doctoral School of Clinical Medicine, University of Szeged, Szeged, Hungary  
Address: H-6720 Szeged, Korányi fasor 8-10., Hungary

<sup>2</sup>Institute for Translational Medicine, Medical School, University of Pécs, Pécs, Hungary  
Address: H-7624 Pécs, Szigeti út 12. 2nd floor, Hungary

<sup>3</sup>Centre for Translational Medicine, Semmelweis University, Budapest, Hungary  
Address: H-1085 Budapest, Üllői út 26., Hungary

<sup>4</sup>Doctoral school, Carol Davila University of Medicine and Pharmacy, Bucharest, Romania  
Address: RO-050474 Bulevardul Eroii Sanitari 8, București, Romania

<sup>5</sup>North West Anglia NHS Foundation Trust, United Kingdom  
Address: Parkway Hinchingsbrooke, Huntingdon PE29 6NT, United Kingdom

<sup>6</sup>Division of Haematology, First Department of Medicine, Medical School, University of Pécs, Pécs, Hungary  
Address: H-7624 Pécs, Ifjúság útja 13., Hungary

**# equally contributed**

**\* Correspondence:**

Hussain Alizadeh M.D., Ph.D., Address: Division of Haematology, First Department of Medicine, Medical School, University of Pécs, H-7624 Pécs, Ifjúság Street 13., Hungary;

Tel: +36306436099

E-mail: alizadeh.hussain@pte.hu

**Patient or population: newly diagnosed multiple myeloma**  
**Intervention: daratumumab + backbone therapy**  
**Comparison: backbone therapy**

| Outcomes                                             | No of participants (studies) | Certainty of the evidence (GRADE) | Relative effect (95% CI) | Anticipated absolute effects |                                                     |
|------------------------------------------------------|------------------------------|-----------------------------------|--------------------------|------------------------------|-----------------------------------------------------|
|                                                      |                              |                                   |                          | Risk with backbone therapy   | Risk difference with daratumumab + backbone therapy |
| minimal residual disease negativity (MRD negativity) | 2735 (4 RCTs)                | ⊕⊕○○<br>LOW                       | OR 3.61 (2.33 to 5.61)   | 226 per 1 000                | 287 more per 1 000 (179 more to 395 more)           |
| stringent complete response (sCR)                    | 2735 (4 RCTs)                | ⊕⊕○○<br>LOW                       | OR 2.29 (1.49 to 3.51)   | 157 per 1 000                | 142 more per 1 000 (60 more to 238 more)            |
| complete response or better (CR or better)           | 2735 (4 RCTs)                | ⊕⊕○○<br>LOW                       | OR 2.14 (1.66 to 2.75)   | 266 per 1 000                | 171 more per 1 000 (110 more to 233 more)           |
| death or disease progression                         | 2528 (3 RCTs)                | ⊕⊕⊕○<br>MODERATE                  | HR 0.47 (0.39 to 0.57)   | 394 per 1 000                | 184 fewer per 1 000 (216 fewer to 146 fewer)        |

\*The risk in the intervention group (and its 95% confidence interval) is based on the assumed risk in the comparison group and the relative effect of the intervention (and its 95% CI).

CI: Confidence interval; OR: Odds ratio; HR: Hazard Ratio

**GRADE Working Group grades of evidence**  
**High certainty:** We are very confident that the true effect lies close to that of the estimate of the effect  
**Moderate certainty:** We are moderately confident in the effect estimate: The true effect is likely to be close to the estimate of the effect, but there is a possibility that it is substantially different  
**Low certainty:** Our confidence in the effect estimate is limited: The true effect may be substantially different from the estimate of the effect  
**Very low certainty:** We have very little confidence in the effect estimate: The true effect is likely to be substantially different from the estimate of effect

**Patient or population: newly diagnosed multiple myeloma**  
**Intervention: daratumumab + backbone therapy**  
**Comparison: backbone therapy**

| Outcomes                   | № of participants (studies) | Certainty of the evidence (GRADE) | Relative effect (95% CI) | Anticipated absolute effects |                                                     |
|----------------------------|-----------------------------|-----------------------------------|--------------------------|------------------------------|-----------------------------------------------------|
|                            |                             |                                   |                          | Risk with backbone therapy   | Risk difference with daratumumab + backbone therapy |
| all grade thrombocytopenia | 1998 (3 RCTs)               | ⊕⊕○○<br>LOW                       | OR 1.20 (0.76 to 1.88)   | 299 per 1 000                | 40 more per 1 000 (54 fewer to 146 more)            |
| grade 3-4 thrombocytopenia | 1998 (3 RCTs)               | ⊕○○○<br>VERY LOW                  | OR 1.27 (0.77 to 2.09)   | 184 per 1 000                | 39 more per 1 000 (36 fewer to 136 more)            |
| all grade lymphopenia      | 2021 (3 RCTs)               | ⊕⊕⊕○<br>MODERATE                  | OR 1.49 (1.17 to 1.89)   | 139 per 1 000                | 55 more per 1 000 (20 more to 95 more)              |
| grade 3-4 lymphopenia      | 2021 (3 RCTs)               | ⊕⊕⊕○<br>MODERATE                  | OR 1.60 (1.21 to 2.11)   | 112 per 1 000                | 56 more per 1 000 (20 more to 98 more)              |
| all grade neutropenia      | 2735 (4 RCTs)               | ⊕⊕○○<br>LOW                       | OR 1.63 (1.06 to 2.49)   | 339 per 1 000                | 116 more per 1 000 (13 more to 222 more)            |
| grade 3-4 neutropenia      | 2735 (4 RCTs)               | ⊕⊕○○<br>LOW                       | OR 1.76 (1.20 to 2.59)   | 271 per 1 000                | 124 more per 1 000 (37 more to 219 more)            |
| all grade anaemia          | 1650 (3 RCTs)               | ⊕○○○<br>VERY LOW                  | OR 1.39 (0.61 to 3.13)   | 336 per 1 000                | 77 more per 1 000 (100 fewer to 277 more)           |

\*The risk in the intervention group (and its 95% confidence interval) is based on the assumed risk in the comparison group and the relative effect of the intervention (and its 95% CI).

CI: Confidence interval; OR: Odds ratio; HR: Hazard Ratio

**GRADE Working Group grades of evidence**

**High certainty:** We are very confident that the true effect lies close to that of the estimate of the effect  
**Moderate certainty:** We are moderately confident in the effect estimate: The true effect is likely to be close to the estimate of the effect, but there is a possibility that it is substantially different. **Low certainty:** Our confidence in the effect estimate is limited: The true effect may be substantially different from the estimate of the effect. **Very low certainty:** We have very little confidence in the effect estimate: The true effect is likely to be substantially different from the estimate of effect

# Patient or population: newly diagnosed multiple myeloma

## Intervention: daratumumab + backbone therapy

## Comparison: backbone therapy

| Outcomes                        | № of participants (studies) | Certainty of the evidence (GRADE) | Relative effect (95% CI) | Anticipated absolute effects |                                                     |
|---------------------------------|-----------------------------|-----------------------------------|--------------------------|------------------------------|-----------------------------------------------------|
|                                 |                             |                                   |                          | Risk with backbone therapy   | Risk difference with daratumumab + backbone therapy |
| grade 3-4 anaemia               | 1650 (3 RCTs)               | ⊕○○○<br>VERY LOW                  | OR 0.77 (0.49 to 1.23)   | 180 per 1 000                | 35 fewer per 1 000 (83 fewer to 33 more)            |
| all grade peripheral neuropathy | 1998 (3 RCTs)               | ⊕⊕⊕○<br>MODERATE                  | OR 0.76 (0.63 to 0.92)   | 535 per 1 000                | 69 fewer per 1 000 (115 fewer to 21 fewer)          |
| grade 3-4 peripheral neuropathy | 1998 (3 RCTs)               | ⊕○○○<br>VERY LOW                  | OR 0.8 (0.4 to 1.6)      | 64 per 1 000                 | 12 fewer per 1 000 (37 fewer to 35 more)            |
| second primary cancer           | 2528 (3 RCTs)               | ⊕○○○<br>VERY LOW                  | OR 0.88 (0.54 to 1.45)   | 27 per 1 000                 | 3 fewer per 1 000 (12 fewer to 12 more)             |

\*The risk in the intervention group (and its 95% confidence interval) is based on the assumed risk in the comparison group and the relative effect of the intervention (and its 95% CI).

CI: Confidence interval; OR: Odds ratio; HR: Hazard Ratio

### GRADE Working Group grades of evidence

High certainty: We are very confident that the true effect lies close to that of the estimate of the effect

Moderate certainty: We are moderately confident in the effect estimate: The true effect is likely to be close to the estimate of the effect, but there is a possibility that it is substantially different

Low certainty: Our confidence in the effect estimate is limited: The true effect may be substantially different from the estimate of the effect

Very low certainty: We have very little confidence in the effect estimate: The true effect is likely to be substantially different from the estimate of effect

**Patient or population: newly diagnosed multiple myeloma**

**Intervention: daratumumab + backbone therapy**

**Comparison: backbone therapy**

| Outcomes               | No of participants (studies) | Certainty of the evidence (GRADE) | Relative effect (95% CI) | Anticipated absolute effects |                                                     |
|------------------------|------------------------------|-----------------------------------|--------------------------|------------------------------|-----------------------------------------------------|
|                        |                              |                                   |                          | Risk with backbone therapy   | Risk difference with daratumumab + backbone therapy |
| All grade hypertension |                              |                                   | Not reported.            |                              |                                                     |
| Grade 3-4 hypertension |                              |                                   | Not reported.            |                              |                                                     |
| Acute heart failure    |                              |                                   | Not reported.            |                              |                                                     |
| Ischemic heart disease |                              |                                   | Not reported.            |                              |                                                     |
| Renal failure          |                              |                                   | Not reported.            |                              |                                                     |

**\*The risk in the intervention group (and its 95% confidence interval) is based on the assumed risk in the comparison group and the relative effect of the intervention (and its 95% CI).**

**CI: Confidence interval; OR: Odds ratio; HR: Hazard Ratio**

**GRADE Working Group grades of evidence**

**High certainty: We are very confident that the true effect lies close to that of the estimate of the effect**

**Moderate certainty: We are moderately confident in the effect estimate: The true effect is likely to be close to the estimate of the effect, but there is a possibility that it is substantially different. Low certainty: Our confidence in the effect estimate is limited: The true effect may be substantially different from the estimate of the effect. Very low certainty: We have very little confidence in the effect estimate: The true effect is likely to be substantially different from the estimate of effect .**

**Our confidence in the effect estimate is limited: The true effect may be substantially different from the estimate of the effect. Very low certainty: We have very little confidence in the effect estimate: The true effect is likely to be substantially different from the estimate of effect .**

# Patient or population: newly diagnosed multiple myeloma

## Intervention: daratumumab + backbone therapy

## Comparison: backbone therapy

| Certainty assessment                       |                   |              |               |              |             |                      | Nº of patients                 |                  | Effect                 |                                                   | Certainty         | Importance |
|--------------------------------------------|-------------------|--------------|---------------|--------------|-------------|----------------------|--------------------------------|------------------|------------------------|---------------------------------------------------|-------------------|------------|
| Nº of studies                              | Study design      | Risk of bias | Inconsistency | Indirectness | Imprecision | Other considerations | daratumumab + backbone therapy | backbone therapy | Relative (95% CI)      | Absolute (95% CI)                                 |                   |            |
| <b>minimal residual disease negativity</b> |                   |              |               |              |             |                      |                                |                  |                        |                                                   |                   |            |
| 4                                          | randomised trials | not serious  | serious       | serious      | not serious | none                 | 587/1365 (43.0%)               | 309/1370 (22.6%) | OR 3.61 (2.33 to 5.61) | 287 more per 1 000 (from 179 more to 395 more)    | ⊕⊕○○<br>LOW       | IMPORTANT  |
| <b>stringent complete response</b>         |                   |              |               |              |             |                      |                                |                  |                        |                                                   |                   |            |
| 4                                          | randomised trials | not serious  | serious       | serious      | not serious | none                 | 392/1365 (28.7%)               | 215/1370 (15.7%) | OR 2.29 (1.49 to 3.51) | 142 more per 1 000 (from 60 more to 238 more)     | ⊕⊕○○<br>LOW       | IMPORTANT  |
| <b>Complete response or better</b>         |                   |              |               |              |             |                      |                                |                  |                        |                                                   |                   |            |
| 4                                          | randomised trials | not serious  | serious       | serious      | not serious | none                 | 597/1365 (43.7%)               | 364/1370 (26.6%) | OR 2.14 (1.66 to 2.75) | 171 more per 1 000 (from 110 more to 233 more)    | ⊕⊕○○<br>LOW       | IMPORTANT  |
| <b>Death or disease progression</b>        |                   |              |               |              |             |                      |                                |                  |                        |                                                   |                   |            |
| 3                                          | randomised trials | not serious  | not serious   | serious      | not serious | none                 | 318/1261 (25.2%)               | 499/1267 (39.4%) | HR 0.47 (0.39 to 0.57) | 184 fewer per 1 000 (from 216 fewer to 146 fewer) | ⊕⊕⊕○<br>MODERATE  | CRITICAL   |
| <b>All grade thrombocytopenia</b>          |                   |              |               |              |             |                      |                                |                  |                        |                                                   |                   |            |
| 3                                          | randomised trials | not serious  | serious       | serious      | not serious | none                 | 324/997 (32.5%)                | 299/1001 (29.9%) | OR 1.20 (0.76 to 1.88) | 40 more per 1 000 (from 54 fewer to 146 more)     | ⊕⊕○○<br>LOW       | IMPORTANT  |
| <b>Grade 3-4 thrombocytopenia</b>          |                   |              |               |              |             |                      |                                |                  |                        |                                                   |                   |            |
| 3                                          | randomised trials | not serious  | serious       | serious      | serious     | none                 | 198/997 (19.9%)                | 183/1001 (18.3%) | OR 1.27 (0.77 to 2.09) | 39 more per 1 000 (from 36 fewer to 136 more)     | ⊕○○○○<br>VERY LOW | IMPORTANT  |
| <b>All grade lymphopenia</b>               |                   |              |               |              |             |                      |                                |                  |                        |                                                   |                   |            |
| 3                                          | randomised trials | not serious  | not serious   | serious      | not serious | none                 | 195/1011 (19.3%)               | 140/1010 (13.9%) | OR 1.49 (1.17 to 1.89) | 55 more per 1 000 (from 20 more to 95 more)       | ⊕⊕⊕○<br>MODERATE  | IMPORTANT  |
| <b>Grade 3-4 lymphopenia</b>               |                   |              |               |              |             |                      |                                |                  |                        |                                                   |                   |            |
| 3                                          | randomised trials | not serious  | not serious   | serious      | not serious | none                 | 169/1011 (16.7%)               | 113/1010 (11.2%) | OR 1.60 (1.21 to 2.11) | 56 more per 1 000 (from 20 more to 98 more)       | ⊕⊕⊕○<br>MODERATE  | IMPORTANT  |

# Patient or population: newly diagnosed multiple myeloma

## Intervention: daratumumab + backbone therapy

## Comparison: backbone therapy

| Certainty assessment                   |                   |              |               |              |             |                      | N° of patients                 |                  | Effect                 |                                                 | Certainty         | Importance |
|----------------------------------------|-------------------|--------------|---------------|--------------|-------------|----------------------|--------------------------------|------------------|------------------------|-------------------------------------------------|-------------------|------------|
| N° of studies                          | Study design      | Risk of bias | Inconsistency | Indirectness | Imprecision | Other considerations | daratumumab + backbone therapy | backbone therapy | Relative (95% CI)      | Absolute (95% CI)                               |                   |            |
| <b>All grade neutropenia</b>           |                   |              |               |              |             |                      |                                |                  |                        |                                                 |                   |            |
| 4                                      | randomised trials | not serious  | serious       | serious      | not serious | none                 | 595/1365 (43.6%)               | 465/1370 (33.9%) | OR 1.63 (1.06 to 2.49) | 116 more per 1 000 (from 13 more to 222 more)   | ⊕⊕○○<br>LOW       | IMPORTANT  |
| <b>Grade 3-4 neutropenia</b>           |                   |              |               |              |             |                      |                                |                  |                        |                                                 |                   |            |
| 4                                      | randomised trials | not serious  | serious       | serious      | not serious | none                 | 510/1365 (37.4%)               | 368/1370 (26.9%) | OR 1.76 (1.20 to 2.59) | 124 more per 1 000 (from 37 more to 219 more)   | ⊕⊕○○<br>LOW       | IMPORTANT  |
| <b>All grade anaemia</b>               |                   |              |               |              |             |                      |                                |                  |                        |                                                 |                   |            |
| 3                                      | randomised trials | not serious  | serious       | serious      | serious     | none                 | 351/822 (42.7%)                | 278/828 (33.6%)  | OR 1.39 (0.61 to 3.13) | 77 more per 1 000 (from 100 fewer to 277 more)  | ⊕○○○○<br>VERY LOW | IMPORTANT  |
| <b>Grade 3-4 anaemia</b>               |                   |              |               |              |             |                      |                                |                  |                        |                                                 |                   |            |
| 3                                      | randomised trials | not serious  | serious       | serious      | serious     | none                 | 112/822 (13.6%)                | 148/828 (17.9%)  | OR 0.77 (0.49 to 1.23) | 35 fewer per 1 000 (from 83 fewer to 33 more)   | ⊕○○○○<br>VERY LOW | IMPORTANT  |
| <b>All grade peripheral neuropathy</b> |                   |              |               |              |             |                      |                                |                  |                        |                                                 |                   |            |
| 3                                      | randomised trials | not serious  | not serious   | serious      | not serious | none                 | 473/997 (47.4%)                | 536/1001 (53.5%) | OR 0.76 (0.63 to 0.92) | 69 fewer per 1 000 (from 115 fewer to 21 fewer) | ⊕⊕⊕○<br>MODERATE  | IMPORTANT  |
| <b>Grade 3-4 peripheral neuropathy</b> |                   |              |               |              |             |                      |                                |                  |                        |                                                 |                   |            |
| 3                                      | randomised trials | not serious  | serious       | serious      | serious     | none                 | 57/997 (5.7%)                  | 64/1001 (6.4%)   | OR 0.8 (0.4 to 1.6)    | 12 fewer per 1 000 (from 37 fewer to 35 more)   | ⊕○○○○<br>VERY LOW | IMPORTANT  |
| <b>Second primary cancer</b>           |                   |              |               |              |             |                      |                                |                  |                        |                                                 |                   |            |
| 3                                      | randomised trials | not serious  | serious       | serious      | serious     | none                 | 30/1261 (2.4%)                 | 34/1267 (2.7%)   | OR 0.88 (0.54 to 1.45) | 3 fewer per 1 000 (from 12 fewer to 12 more)    | ⊕○○○○<br>VERY LOW | IMPORTANT  |

**All grade hypertension, grade 3-4 hypertension, acute heart failure, ischemic heart failure, and renal failure were not reported.**

**Patient or population: newly diagnosed multiple myeloma with standard cytogenetic risk**

**Intervention: daratumumab + backbone therapy**

**Comparison: backbone therapy**

| Outcomes                                             | No of participants (studies) | Certainty of the evidence (GRADE) | Relative effect (95% CI) | Anticipated absolute effects |                                                     |
|------------------------------------------------------|------------------------------|-----------------------------------|--------------------------|------------------------------|-----------------------------------------------------|
|                                                      |                              |                                   |                          | Risk with backbone therapy   | Risk difference with daratumumab + backbone therapy |
| death or disease progression                         | 1982 (3 RCTs)                | ⊕⊕○○<br>LOW                       | HR 0.43 (0.35 to 0.53)   | 291 per 1 000                | 153 fewer per 1 000 (178 fewer to 124 fewer)        |
| minimal residual disease negativity (MRD negativity) | 165 (1 RCT)                  | ⊕⊕○○<br>LOW                       | OR 4.72 (2.37 to 9.40)   | 205 per 1 000                | 344 more per 1 000 (174 more to 503 more)           |
| stringent complete response (sCR)                    | 677 (2 RCTs)                 | ⊕⊕○○<br>LOW                       | OR 2.51 (1.72 to 3.65)   | 151 per 1 000                | 158 more per 1 000 (83 more to 243 more)            |
| complete response or better (CR or better)           | 518 (1 RCT)                  | ⊕⊕○○<br>LOW                       | OR 2.70 (1.86 to 3.91)   | 257 per 1 000                | 226 more per 1 000 (134 more to 318 more)           |

\*The risk in the intervention group (and its 95% confidence interval) is based on the assumed risk in the comparison group and the relative effect of the intervention (and its 95% CI).

CI: Confidence interval; HR: Hazard Ratio; OR: Odds ratio

**GRADE Working Group grades of evidence**

**High certainty:** We are very confident that the true effect lies close to that of the estimate of the effect

**Moderate certainty:** We are moderately confident in the effect estimate: The true effect is likely to be close to the estimate of the effect, but there is a possibility that it is substantially different

**Low certainty:** Our confidence in the effect estimate is limited: The true effect may be substantially different from the estimate of the effect

**Very low certainty:** We have very little confidence in the effect estimate: The true effect is likely to be substantially different from the estimate of effect



**Patient or population: newly diagnosed multiple myeloma with standard cytogenetic risk**  
**Intervention: daratumumab + backbone therapy**  
**Comparison: backbone therapy**

| Outcomes                                       | № of participants (studies) | Certainty of the evidence (GRADE) | Relative effect (95% CI) | Anticipated absolute effects |                                                     |
|------------------------------------------------|-----------------------------|-----------------------------------|--------------------------|------------------------------|-----------------------------------------------------|
|                                                |                             |                                   |                          | Risk with backbone therapy   | Risk difference with daratumumab + backbone therapy |
| All grade thrombocytopenia - not reported      |                             |                                   | Not reported.            |                              |                                                     |
| Grade 3-4 thrombocytopenia - not reported      |                             |                                   | Not reported.            |                              |                                                     |
| All grade lymphopenia - not reported           |                             |                                   | Not reported.            |                              |                                                     |
| Grade 3-4 lymphopenia - not reported           |                             |                                   | Not reported.            |                              |                                                     |
| All grade neutropenia - not reported           |                             |                                   | Not reported.            |                              |                                                     |
| Grade 3-4 neutropenia - not reported           |                             |                                   | Not reported.            |                              |                                                     |
| All grade anaemia - not reported               |                             |                                   | Not reported.            |                              |                                                     |
| Grade 3-4 anaemia - not reported               |                             |                                   | Not reported.            |                              |                                                     |
| All grade peripheral neuropathy - not reported |                             |                                   | Not reported.            |                              |                                                     |
| Grade 3-4 peripheral neuropathy - not reported |                             |                                   | Not reported.            |                              |                                                     |
| All grade hypertension - not reported          |                             |                                   | Not reported.            |                              |                                                     |
| Grade 3-4 hypertension - not reported          |                             |                                   | Not reported.            |                              |                                                     |
| Acute cardiac failure - not reported           |                             |                                   | Not reported.            |                              |                                                     |
| Ischaemic heart disease - not reported         |                             |                                   | Not reported.            |                              |                                                     |
| Renal failure - not reported                   |                             |                                   | Not reported.            |                              |                                                     |

\*The risk in the intervention group (and its 95% confidence interval) is based on the assumed risk in the comparison group and the relative effect of the intervention (and its 95% CI).

CI: Confidence interval; HR: Hazard Ratio; OR: Odds ratio

GRADE Working Group grades of evidence

High certainty: We are very confident that the true effect lies close to that of the estimate of the effect

Moderate certainty: We are moderately confident in the effect estimate: The true effect is likely to be close to the estimate of the effect, but there is a possibility that it is substantially different

Low certainty: Our confidence in the effect estimate is limited: The true effect may be substantially different from the estimate of the effect

Very low certainty: We have very little confidence in the effect estimate: The true effect is likely to be substantially different from the estimate of effect

# Patient or population: newly diagnosed multiple myeloma with standard cytogenetic risk

## Intervention: daratumumab + backbone therapy

## Comparison: backbone therapy

| Certainty assessment                       |                   |              |               |              |             |                      | N <sup>o</sup> of patients     |                  | Effect                 |                                                   | Certainty   | Importance |
|--------------------------------------------|-------------------|--------------|---------------|--------------|-------------|----------------------|--------------------------------|------------------|------------------------|---------------------------------------------------|-------------|------------|
| N <sup>o</sup> of studies                  | Study design      | Risk of bias | Inconsistency | Indirectness | Imprecision | Other considerations | daratumumab + backbone therapy | backbone therapy | Relative (95% CI)      | Absolute (95% CI)                                 |             |            |
| <b>death or disease progression</b>        |                   |              |               |              |             |                      |                                |                  |                        |                                                   |             |            |
| 3                                          | randomised trials | not serious  | not serious   | serious      | serious     | none                 | 992                            | 990              | HR 0.43 (0.35 to 0.53) | 153 fewer per 1 000 (from 178 fewer to 124 fewer) | ⊕⊕○○<br>LOW | CRITICAL   |
| <b>Minimal residual disease negativity</b> |                   |              |               |              |             |                      |                                |                  |                        |                                                   |             |            |
| 1                                          | randomised trials | serious      | not serious   | not serious  | serious     | none                 | 45/82 (54.9%)                  | 17/83 (20.5%)    | OR 4.72 (2.37 to 9.40) | 344 more per 1 000 (from 174 more to 503 more)    | ⊕⊕○○<br>LOW | IMPORTANT  |
| <b>Stringent complete response</b>         |                   |              |               |              |             |                      |                                |                  |                        |                                                   |             |            |
| 2                                          | randomised trials | serious      | not serious   | not serious  | serious     | none                 | 105/340 (30.9%)                | 51/337 (15.1%)   | OR 2.51 (1.72 to 3.65) | 158 more per 1 000 (from 83 more to 243 more)     | ⊕⊕○○<br>LOW | IMPORTANT  |
| <b>Complete response or better</b>         |                   |              |               |              |             |                      |                                |                  |                        |                                                   |             |            |
| 1                                          | randomised trials | serious      | not serious   | not serious  | serious     | none                 | 126/261 (48.3%)                | 66/257 (25.7%)   | OR 2.70 (1.86 to 3.91) | 226 more per 1 000 (from 134 more to 318 more)    | ⊕⊕○○<br>LOW | IMPORTANT  |

All grade thrombocytopenia, grade 3-4 thrombocytopenia, all grade lymphopenia, grade 3-4 lymphopenia, all grade neutropenia, grade 3-4 neutropenia, all grade anaemia, grade 3-4 anaemia, all grade peripheral neuropathy, grade 3-4 peripheral neuropathy, all grade hypertension, grade 3-4 hypertension, acute cardiac failure, ischaemic heart failure, and renal failure were not reported.

# Patient or population: newly diagnosed multiple myeloma with high cytogenetic risk

**Intervention: daratumumab + backbone therapy**

**Comparison: backbone therapy**

| Outcomes                                             | No of participants (studies) | Certainty of the evidence (GRADE) | Relative effect (95% CI) | Anticipated absolute effects |                                                     |
|------------------------------------------------------|------------------------------|-----------------------------------|--------------------------|------------------------------|-----------------------------------------------------|
|                                                      |                              |                                   |                          | Risk with backbone therapy   | Risk difference with daratumumab + backbone therapy |
| death or disease progression                         | 358 (3 RCTs)                 | ⊕⊕○○<br>LOW                       | HR 0.76 (0.53 to 1.10)   | 331 per 1 000                | 68 fewer per 1 000 (139 fewer to 26 more)           |
| minimal residual disease negativity (MRD negativity) | 30 (1 RCT)                   | ⊕○○○<br>VERY LOW                  | OR 1.50 (0.32 to 6.99)   | 286 per 1 000                | 89 more per 1 000 (172 fewer to 451 more)           |
| stringent complete response (sCR)                    | 312 (2 RCTs)                 | ⊕○○○<br>VERY LOW                  | OR 1.63 (0.91 to 2.92)   | 148 per 1 000                | 73 more per 1 000 (11 fewer to 188 more)            |
| complete response or better (CR or better)           | 98 (1 RCT)                   | ⊕⊕○○<br>LOW                       | OR 2.19 (0.92 to 5.25)   | 244 per 1 000                | 170 more per 1 000 (15 fewer to 385 more)           |

\*The risk in the intervention group (and its 95% confidence interval) is based on the assumed risk in the comparison group and the relative effect of the intervention (and its 95% CI).

CI: Confidence interval; HR: Hazard Ratio; OR: Odds ratio

## GRADE Working Group grades of evidence

**High certainty:** We are very confident that the true effect lies close to that of the estimate of the effect

**Moderate certainty:** We are moderately confident in the effect estimate: The true effect is likely to be close to the estimate of the effect, but there is a possibility that it is substantially different

**Low certainty:** Our confidence in the effect estimate is limited: The true effect may be substantially different from the estimate of the effect

**Very low certainty:** We have very little confidence in the effect estimate: The true effect is likely to be substantially different from the estimate of effect

**Patient or population: newly diagnosed multiple myeloma with high cytogenetic risk**

**Intervention: daratumumab + backbone therapy**

**Comparison: backbone therapy**

| Outcomes                                       | № of participants (studies) | Certainty of the evidence (GRADE) | Relative effect (95% CI) | Anticipated absolute effects |                                                     |
|------------------------------------------------|-----------------------------|-----------------------------------|--------------------------|------------------------------|-----------------------------------------------------|
|                                                |                             |                                   |                          | Risk with backbone therapy   | Risk difference with daratumumab + backbone therapy |
| All grade thrombocytopenia - not reported      |                             |                                   | Not reported.            |                              |                                                     |
| Grade 3-4 thrombocytopenia - not reported      |                             |                                   | Not reported.            |                              |                                                     |
| All grade lymphopenia - not reported           |                             |                                   | Not reported.            |                              |                                                     |
| Grade 3-4 lymphopenia - not reported           |                             |                                   | Not reported.            |                              |                                                     |
| All grade neutropenia - not reported           |                             |                                   | Not reported.            |                              |                                                     |
| Grade 3-4 neutropenia - not reported           |                             |                                   | Not reported.            |                              |                                                     |
| All grade anaemia - not reported               |                             |                                   | Not reported.            |                              |                                                     |
| Grade 3-4 anaemia - not reported               |                             |                                   | Not reported.            |                              |                                                     |
| All grade peripheral neuropathy - not reported |                             |                                   | Not reported.            |                              |                                                     |
| Grade 3-4 peripheral neuropathy - not reported |                             |                                   | Not reported.            |                              |                                                     |
| All grade hypertension - not reported          |                             |                                   | Not reported.            |                              |                                                     |
| Grade 3-4 hypertension - not reported          |                             |                                   | Not reported.            |                              |                                                     |
| Acute cardiac failure - not reported           |                             |                                   | Not reported.            |                              |                                                     |
| Ischaemic heart disease - not reported         |                             |                                   | Not reported.            |                              |                                                     |
| Renal failure - not reported                   |                             |                                   | Not reported.            |                              |                                                     |

\*The risk in the intervention group (and its 95% confidence interval) is based on the assumed risk in the comparison group and the relative effect of the intervention (and its 95% CI).

CI: Confidence interval; HR: Hazard Ratio; OR: Odds ratio

GRADE Working Group grades of evidence

High certainty: We are very confident that the true effect lies close to that of the estimate of the effect

Moderate certainty: We are moderately confident in the effect estimate: The true effect is likely to be close to the estimate of the effect, but there is a possibility that it is substantially different

Low certainty: Our confidence in the effect estimate is limited: The true effect may be substantially different from the estimate of the effect

Very low certainty: We have very little confidence in the effect estimate: The true effect is likely to be substantially different from the estimate of effect

# Patient or population: newly diagnosed multiple myeloma with high cytogenetic risk

## Intervention: daratumumab + backbone therapy

## Comparison: backbone therapy

| Certainty assessment                |                   |              |               |              |              |                      | № of patients                  |                  | Effect                 |                                                | Certainty        | Importance |
|-------------------------------------|-------------------|--------------|---------------|--------------|--------------|----------------------|--------------------------------|------------------|------------------------|------------------------------------------------|------------------|------------|
| № of studies                        | Study design      | Risk of bias | Inconsistency | Indirectness | Imprecision  | Other considerations | daratumumab + backbone therapy | backbone therapy | Relative (95% CI)      | Absolute (95% CI)                              |                  |            |
| death or disease progression        |                   |              |               |              |              |                      |                                |                  |                        |                                                |                  |            |
| 3                                   | randomised trials | not serious  | not serious   | serious      | serious      | none                 | 183                            | 175              | HR 0.76 (0.53 to 1.10) | 68 fewer per 1 000 (from 139 fewer to 26 more) | ⊕⊕○○<br>LOW      | CRITICAL   |
| minimal residual disease negativity |                   |              |               |              |              |                      |                                |                  |                        |                                                |                  |            |
| 1                                   | randomised trials | serious      | not serious   | not serious  | very serious | none                 | 6/16 (37.5%)                   | 4/14 (28.6%)     | OR 1.50 (0.32 to 6.99) | 89 more per 1 000 (from 172 fewer to 451 more) | ⊕○○○<br>VERY LOW | IMPORTANT  |
| stringent complete response         |                   |              |               |              |              |                      |                                |                  |                        |                                                |                  |            |
| 2                                   | randomised trials | not serious  | not serious   | serious      | very serious | none                 | 30/136 (22.1%)                 | 26/176 (14.8%)   | OR 1.63 (0.91 to 2.92) | 73 more per 1 000 (from 11 fewer to 188 more)  | ⊕○○○<br>VERY LOW | IMPORTANT  |
| complete response or better         |                   |              |               |              |              |                      |                                |                  |                        |                                                |                  |            |
| 1                                   | randomised trials | not serious  | not serious   | not serious  | very serious | none                 | 22/53 (41.5%)                  | 11/45 (24.4%)    | OR 2.19 (0.92 to 5.25) | 170 more per 1 000 (from 15 fewer to 385 more) | ⊕⊕○○<br>LOW      | IMPORTANT  |

All grade thrombocytopenia, grade 3-4 thrombocytopenia, all grade lymphopenia, grade 3-4 lymphopenia, all grade neutropenia, grade 3-4 neutropenia, all grade anaemia, grade 3-4 anaemia, all grade peripheral neuropathy, grade 3-4 peripheral neuropathy, all grade hypertension, grade 3-4 hypertension, acute cardiac failure, ischaemic heart failure, and renal failure were not reported.

# Patient or population: relapsed/refractory multiple myeloma

## Intervention: daratumumab + backbone therapy

## Comparison: backbone therapy

| Outcomes                            | № of participants (studies) | Certainty of the evidence (GRADE) | Relative effect (95% CI) | Anticipated absolute effects |                                                     |
|-------------------------------------|-----------------------------|-----------------------------------|--------------------------|------------------------------|-----------------------------------------------------|
|                                     |                             |                                   |                          | Risk with backbone therapy   | Risk difference with daratumumab + backbone therapy |
| minimal residual disease negativity | 970 (3 RCTs)                | ⊕⊕⊕○<br>MODERATE                  | OR 5.43 (2.76 to 10.66)  | 27 per 1 000                 | 104 more per 1 000 (44 more to 201 more)            |
| stringent complete response         | 1571 (4 RCTs)               | ⊕⊕⊕○<br>MODERATE                  | OR 3.08 (2.00 to 4.76)   | 40 per 1 000                 | 74 more per 1 000 (37 more to 126 more)             |
| complete response or better         | 1571 (4 RCTs)               | ⊕⊕⊕○<br>MODERATE                  | OR 3.50 (2.33 to 5.25)   | 117 per 1 000                | 199 more per 1 000 (119 more to 293 more)           |
| death or disease progression        | 2048 (5 RCTs)               | ⊕⊕○○<br>LOW                       | HR 0.50 (0.37 to 0.67)   | 559 per 1 000                | 223 fewer per 1 000 (298 fewer to 137 fewer)        |

\*The risk in the intervention group (and its 95% confidence interval) is based on the assumed risk in the comparison group and the relative effect of the intervention (and its 95% CI).

CI: Confidence interval; OR: Odds ratio; HR: Hazard Ratio

### GRADE Working Group grades of evidence

**High certainty:** We are very confident that the true effect lies close to that of the estimate of the effect

**Moderate certainty:** We are moderately confident in the effect estimate: The true effect is likely to be close to the estimate of the effect, but there is a possibility that it is substantially different

**Low certainty:** Our confidence in the effect estimate is limited: The true effect may be substantially different from the estimate of the effect

**Very low certainty:** We have very little confidence in the effect estimate: The true effect is likely to be substantially different from the estimate of effect

| Patient or population: relapsed/refractory multiple myeloma |                              |                                   |                          |                              |                                                     |
|-------------------------------------------------------------|------------------------------|-----------------------------------|--------------------------|------------------------------|-----------------------------------------------------|
| Intervention: daratumumab + backbone therapy                |                              |                                   |                          |                              |                                                     |
| Comparison: backbone therapy                                |                              |                                   |                          |                              |                                                     |
| Outcomes                                                    | No of participants (studies) | Certainty of the evidence (GRADE) | Relative effect (95% CI) | Anticipated absolute effects |                                                     |
|                                                             |                              |                                   |                          | Risk with backbone therapy   | Risk difference with daratumumab + backbone therapy |
| all grade thrombocytopenia                                  | 1743 (4 RCTs)                | ⊕⊕○○<br>LOW                       | OR 1.58 (1.03 to 2.43)   | 366 per 1 000                | 111 more per 1 000 (7 more to 218 more)             |
| grade 3-4 thrombocytopenia                                  | 1743 (4 RCTs)                | ⊕⊕⊕○<br>MODERATE                  | OR 1.47 (1.10 to 1.98)   | 220 per 1 000                | 73 more per 1 000 (17 more to 138 more)             |
| all grade lymphopenia                                       | 1743 (4 RCTs)                | ⊕○○○<br>VERY LOW                  | OR 1.54 (0.89 to 2.66)   | 94 per 1 000                 | 44 more per 1 000 (9 fewer to 122 more)             |
| grade 3-4 lymphopenia                                       | 1743 (4 RCTs)                | ⊕⊕○○<br>LOW                       | OR 1.75 (1.02 to 2.99)   | 62 per 1 000                 | 42 more per 1 000 (1 more to 103 more)              |
| all grade neutropenia                                       | 1743 (4 RCTs)                | ⊕⊕⊕○<br>MODERATE                  | OR 1.98 (1.56 to 2.52)   | 232 per 1 000                | 142 more per 1 000 (88 more to 200 more)            |
| grade 3-4 neutropenia                                       | 1743 (4 RCTs)                | ⊕⊕○○<br>LOW                       | OR 1.84 (0.98 to 3.46)   | 168 per 1 000                | 102 more per 1 000 (3 fewer to 244 more)            |

\*The risk in the intervention group (and its 95% confidence interval) is based on the assumed risk in the comparison group and the relative effect of the intervention (and its 95% CI).  
CI: Confidence interval; OR: Odds ratio; HR: Hazard Ratio

**GRADE Working Group grades of evidence**  
High certainty: We are very confident that the true effect lies close to that of the estimate of the effect  
Moderate certainty: We are moderately confident in the effect estimate: The true effect is likely to be close to the estimate of the effect, but there is a possibility that it is substantially different. Low certainty: Our confidence in the effect estimate is limited: The true effect may be substantially different from the estimate of the effect. Very low certainty: We have very little confidence in the effect estimate: The true effect is likely to be substantially different from the estimate of effect

| Patient or population: relapsed/refractory multiple myeloma |                              |                                   |                          |                              |                                                     |
|-------------------------------------------------------------|------------------------------|-----------------------------------|--------------------------|------------------------------|-----------------------------------------------------|
| Intervention: daratumumab + backbone therapy                |                              |                                   |                          |                              |                                                     |
| Comparison: backbone therapy                                |                              |                                   |                          |                              |                                                     |
| Outcomes                                                    | No of participants (studies) | Certainty of the evidence (GRADE) | Relative effect (95% CI) | Anticipated absolute effects |                                                     |
|                                                             |                              |                                   |                          | Risk with backbone therapy   | Risk difference with daratumumab + backbone therapy |
| all grade anaemia                                           | 1743 (4 RCTs)                | ⊕⊕⊕○<br>MODERATE                  | OR 0.89 (0.72 to 1.10)   | 362 per 1 000                | 26 fewer per 1 000 (72 fewer to 22 more)            |
| grade 3-4 anaemia                                           | 1743 (4 RCTs)                | ⊕○○○<br>VERY LOW                  | OR 0.91 (0.62 to 1.34)   | 170 per 1 000                | 13 fewer per 1 000 (57 fewer to 45 more)            |
| all grade hypertension                                      | 1174 (3 RCTs)                | ⊕⊕○○<br>LOW                       | OR 2.21 (0.92 to 5.29)   | 113 per 1 000                | 106 more per 1 000 (8 fewer to 289 more)            |
| grade 3-4 hypertension                                      | 1174 (3 RCTs)                | ⊕⊕○○<br>LOW                       | OR 3.21 (0.97 to 10.61)  | 51 per 1 000                 | 96 more per 1 000 (1 fewer to 312 more)             |
| all grade neuropathy                                        | 941 (2 RCTs)                 | ⊕⊕○○<br>LOW                       | OR 1.24 (0.93 to 1.65)   | 262 per 1 000                | 44 more per 1 000 (14 fewer to 107 more)            |
| grade 3-4 neuropathy                                        | 941 (2 RCTs)                 | ⊕⊕○○<br>LOW                       | OR 0.48 (0.22 to 1.04)   | 41 per 1 000                 | 21 fewer per 1 000 (32 fewer to 2 more)             |

\*The risk in the intervention group (and its 95% confidence interval) is based on the assumed risk in the comparison group and the relative effect of the intervention (and its 95% CI). CI: Confidence interval; OR: Odds ratio; HR: Hazard Ratio

GRADE Working Group grades of evidence  
High certainty: We are very confident that the true effect lies close to that of the estimate of the effect  
Moderate certainty: We are moderately confident in the effect estimate: The true effect is likely to be close to the estimate of the effect, but there is a possibility that it is substantially different. Low certainty: Our confidence in the effect estimate is limited: The true effect may be substantially different from the estimate of the effect. Very low certainty: We have very little confidence in the effect estimate: The true effect is likely to be substantially different from the estimate of effect



# Patient or population: relapsed/refractory multiple myeloma

## Intervention: daratumumab + backbone therapy

## Comparison: backbone therapy

| Outcomes                | № of participants (studies) | Certainty of the evidence (GRADE) | Relative effect (95% CI) | Anticipated absolute effects |                                                     |
|-------------------------|-----------------------------|-----------------------------------|--------------------------|------------------------------|-----------------------------------------------------|
|                         |                             |                                   |                          | Risk with backbone therapy   | Risk difference with daratumumab + backbone therapy |
| second primary cancer   | 1048 (2 RCTs)               | ⊕⊕○○<br>LOW                       | OR 1.26 (0.57 to 2.80)   | 21 per 1 000                 | 5 more per 1 000 (9 fewer to 36 more)               |
| acute cardiac failure   | 461 (1 RCT)                 | ⊕⊕○○<br>LOW                       | OR 0.69 (0.35 to 1.35)   | 105 per 1 000                | 30 fewer per 1 000 (65 fewer to 32 more)            |
| ischaemic heart disease | 461 (1 RCT)                 | ⊕⊕○○<br>LOW                       | OR 1.30 (0.46 to 3.73)   | 33 per 1 000                 | 9 more per 1 000 (17 fewer to 79 more)              |
| renal failure           | 461 (1 RCT)                 | ⊕⊕○○<br>LOW                       | OR 0.73 (0.34 to 1.56)   | 78 per 1 000                 | 20 fewer per 1 000 (50 fewer to 39 more)            |

\*The risk in the intervention group (and its 95% confidence interval) is based on the assumed risk in the comparison group and the relative effect of the intervention (and its 95% CI).

CI: Confidence interval; OR: Odds ratio; HR: Hazard Ratio

### GRADE Working Group grades of evidence

High certainty: We are very confident that the true effect lies close to that of the estimate of the effect

Moderate certainty: We are moderately confident in the effect estimate: The true effect is likely to be close to the estimate of the effect, but there is a possibility that it is substantially different. Low

certainty: Our confidence in the effect estimate is limited: The true effect may be substantially different from the estimate of the effect. Very low certainty: We have very little confidence in the effect estimate: The true effect is likely to be substantially different from the estimate of effect

# Patient or population: relapsed/refractory multiple myeloma

## Intervention: daratumumab + backbone therapy

## Comparison: backbone therapy

| Certainty assessment                |                   |              |               |              |             |                      | № of patients                  |                  | Effect                  |                                                   | Certainty     | Importance |
|-------------------------------------|-------------------|--------------|---------------|--------------|-------------|----------------------|--------------------------------|------------------|-------------------------|---------------------------------------------------|---------------|------------|
| № of studies                        | Study design      | Risk of bias | Inconsistency | Indirectness | Imprecision | Other considerations | daratumumab + backbone therapy | backbone therapy | Relative (95% CI)       | Absolute (95% CI)                                 |               |            |
| minimal residual disease negativity |                   |              |               |              |             |                      |                                |                  |                         |                                                   |               |            |
| 3                                   | randomised trials | not serious  | not serious   | serious      | not serious | none                 | 87/600 (14.5%)                 | 10/370 (2.7%)    | OR 5.43 (2.76 to 10.66) | 104 more per 1 000 (from 44 more to 201 more)     | ⊕⊕⊕○ MODERATE | IMPORTANT  |
| stringent complete response         |                   |              |               |              |             |                      |                                |                  |                         |                                                   |               |            |
| 4                                   | randomised trials | not serious  | not serious   | serious      | not serious | none                 | 98/825 (11.9%)                 | 30/746 (4.0%)    | OR 3.08 (2.00 to 4.76)  | 74 more per 1 000 (from 37 more to 126 more)      | ⊕⊕⊕○ MODERATE | IMPORTANT  |
| complete response or better         |                   |              |               |              |             |                      |                                |                  |                         |                                                   |               |            |
| 4                                   | randomised trials | not serious  | not serious   | serious      | not serious | none                 | 249/825 (30.2%)                | 87/746 (11.7%)   | OR 3.50 (2.33 to 5.25)  | 199 more per 1 000 (from 119 more to 293 more)    | ⊕⊕⊕○ MODERATE | IMPORTANT  |
| death or disease progression        |                   |              |               |              |             |                      |                                |                  |                         |                                                   |               |            |
| 5                                   | randomised trials | not serious  | serious       | serious      | not serious | none                 | 476/1141 (41.7%)               | 507/907 (55.9%)  | HR 0.50 (0.37 to 0.67)  | 223 fewer per 1 000 (from 298 fewer to 137 fewer) | ⊕⊕○○ LOW      | CRITICAL   |
| all grade thrombocytopenia          |                   |              |               |              |             |                      |                                |                  |                         |                                                   |               |            |
| 4                                   | randomised trials | not serious  | serious       | serious      | not serious | none                 | 461/989 (46.6%)                | 276/752 (36.7%)  | OR 1.58 (1.03 to 2.43)  | 111 more per 1 000 (from 7 more to 218 more)      | ⊕⊕○○ LOW      | IMPORTANT  |
| grade 3-4 thrombocytopenia          |                   |              |               |              |             |                      |                                |                  |                         |                                                   |               |            |
| 4                                   | randomised trials | not serious  | not serious   | serious      | not serious | none                 | 293/989 (29.6%)                | 166/754 (22.0%)  | OR 1.47 (1.10 to 1.98)  | 74 more per 1 000 (from 17 more to 140 more)      | ⊕⊕⊕○ MODERATE | IMPORTANT  |

# Patient or population: relapsed/refractory multiple myeloma

## Intervention: daratumumab + backbone therapy

## Comparison: backbone therapy

| Certainty assessment  |                   |              |               |              |             |                      | № of patients                  |                  | Effect                 |                                               | Certainty        | Importance |
|-----------------------|-------------------|--------------|---------------|--------------|-------------|----------------------|--------------------------------|------------------|------------------------|-----------------------------------------------|------------------|------------|
| № of studies          | Study design      | Risk of bias | Inconsistency | Indirectness | Imprecision | Other considerations | daratumumab + backbone therapy | backbone therapy | Relative (95% CI)      | Absolute (95% CI)                             |                  |            |
| all grade lymphopenia |                   |              |               |              |             |                      |                                |                  |                        |                                               |                  |            |
| 4                     | randomised trials | not serious  | serious       | serious      | serious     | none                 | 156/989 (15.8%)                | 71/754 (9.4%)    | OR 1.54 (0.89 to 2.66) | 44 more per 1 000 (from 10 fewer to 123 more) | ⊕○○○<br>VERY LOW | IMPORTANT  |
| grade 3-4 lymphopenia |                   |              |               |              |             |                      |                                |                  |                        |                                               |                  |            |
| 4                     | randomised trials | not serious  | serious       | serious      | not serious | none                 | 120/989 (12.1%)                | 47/754 (6.2%)    | OR 1.75 (1.02 to 2.99) | 43 more per 1 000 (from 1 more to 105 more)   | ⊕⊕○○<br>LOW      | IMPORTANT  |
| all grade neutropenia |                   |              |               |              |             |                      |                                |                  |                        |                                               |                  |            |
| 4                     | randomised trials | not serious  | not serious   | serious      | not serious | none                 | 322/989 (32.6%)                | 175/754 (23.3%)  | OR 1.98 (1.56 to 2.52) | 142 more per 1 000 (from 88 more to 200 more) | ⊕⊕⊕○<br>MODERATE | IMPORTANT  |
| grade 3-4 neutropenia |                   |              |               |              |             |                      |                                |                  |                        |                                               |                  |            |
| 4                     | randomised trials | not serious  | serious       | serious      | not serious | none                 | 227/989 (23.0%)                | 127/754 (16.8%)  | OR 1.84 (0.98 to 3.46) | 104 more per 1 000 (from 3 fewer to 246 more) | ⊕⊕○○<br>LOW      | IMPORTANT  |
| all grade anaemia     |                   |              |               |              |             |                      |                                |                  |                        |                                               |                  |            |
| 4                     | randomised trials | not serious  | not serious   | serious      | not serious | none                 | 361/989 (36.5%)                | 273/754 (36.3%)  | OR 0.89 (0.72 to 1.10) | 26 fewer per 1 000 (from 72 fewer to 22 more) | ⊕⊕⊕○<br>MODERATE | IMPORTANT  |
| grade 3-4 anaemia     |                   |              |               |              |             |                      |                                |                  |                        |                                               |                  |            |
| 4                     | randomised trials | not serious  | serious       | serious      | serious     | none                 | 156/989 (15.8%)                | 128/754 (17.0%)  | OR 0.91 (0.62 to 1.34) | 13 fewer per 1 000 (from 58 fewer to 46 more) | ⊕○○○<br>VERY LOW | IMPORTANT  |

# Patient or population: relapsed/refractory multiple myeloma

## Intervention: daratumumab + backbone therapy

## Comparison: backbone therapy

| Certainty assessment   |                   |              |               |              |             |                      | № of patients                  |                  | Effect                  |                                               | Certainty   | Importance |
|------------------------|-------------------|--------------|---------------|--------------|-------------|----------------------|--------------------------------|------------------|-------------------------|-----------------------------------------------|-------------|------------|
| № of studies           | Study design      | Risk of bias | Inconsistency | Indirectness | Imprecision | Other considerations | daratumumab + backbone therapy | backbone therapy | Relative (95% CI)       | Absolute (95% CI)                             |             |            |
| all grade hypertension |                   |              |               |              |             |                      |                                |                  |                         |                                               |             |            |
| 3                      | randomised trials | not serious  | serious       | serious      | not serious | none                 | 142/703 (20.2%)                | 53/471 (11.3%)   | OR 2.21 (0.92 to 5.29)  | 109 more per 1 000 (from 8 fewer to 293 more) | ⊕⊕○○<br>LOW | IMPORTANT  |
| grade 3-4 hypertension |                   |              |               |              |             |                      |                                |                  |                         |                                               |             |            |
| 3                      | randomised trials | not serious  | serious       | serious      | not serious | none                 | 87/703 (12.4%)                 | 24/471 (5.1%)    | OR 3.21 (0.97 to 10.61) | 98 more per 1 000 (from 1 fewer to 317 more)  | ⊕⊕○○<br>LOW | IMPORTANT  |
| all grade neuropathy   |                   |              |               |              |             |                      |                                |                  |                         |                                               |             |            |
| 2                      | randomised trials | not serious  | not serious   | serious      | serious     | none                 | 168/551 (30.5%)                | 102/390 (26.2%)  | OR 1.24 (0.93 to 1.65)  | 44 more per 1 000 (from 14 fewer to 107 more) | ⊕⊕○○<br>LOW | IMPORTANT  |
| grade 3-4 neuropathy   |                   |              |               |              |             |                      |                                |                  |                         |                                               |             |            |
| 2                      | randomised trials | not serious  | not serious   | serious      | serious     | none                 | 11/551 (2.0%)                  | 16/390 (4.1%)    | OR 0.48 (0.22 to 1.04)  | 21 fewer per 1 000 (from 32 fewer to 2 more)  | ⊕⊕○○<br>LOW | IMPORTANT  |

# Patient or population: relapsed/refractory multiple myeloma

## Intervention: daratumumab + backbone therapy

## Comparison: backbone therapy

| Certainty assessment           |                   |              |               |              |              |                      | № of patients                  |                  | Effect                 |                                               | Certainty   | Importance |
|--------------------------------|-------------------|--------------|---------------|--------------|--------------|----------------------|--------------------------------|------------------|------------------------|-----------------------------------------------|-------------|------------|
| № of studies                   | Study design      | Risk of bias | Inconsistency | Indirectness | Imprecision  | Other considerations | daratumumab + backbone therapy | backbone therapy | Relative (95% CI)      | Absolute (95% CI)                             |             |            |
| <b>second primary cancer</b>   |                   |              |               |              |              |                      |                                |                  |                        |                                               |             |            |
| 2                              | randomised trials | not serious  | not serious   | serious      | serious      | none                 | 14/528 (2.7%)                  | 11/520 (2.1%)    | OR 1.26 (0.57 to 2.80) | 5 more per 1 000 (from 9 fewer to 36 more)    | ⊕⊕○○<br>LOW | IMPORTANT  |
| <b>Acute cardiac failure</b>   |                   |              |               |              |              |                      |                                |                  |                        |                                               |             |            |
| 1                              | randomised trials | not serious  | not serious   | not serious  | very serious | none                 | 23/308 (7.5%)                  | 16/153 (10.5%)   | OR 0.69 (0.35 to 1.35) | 30 fewer per 1 000 (from 65 fewer to 32 more) | ⊕⊕○○<br>LOW | IMPORTANT  |
| <b>Ischaemic heart disease</b> |                   |              |               |              |              |                      |                                |                  |                        |                                               |             |            |
| 1                              | randomised trials | not serious  | not serious   | not serious  | very serious | none                 | 13/308 (4.2%)                  | 5/153 (3.3%)     | OR 1.30 (0.46 to 3.73) | 9 more per 1 000 (from 17 fewer to 79 more)   | ⊕⊕○○<br>LOW | IMPORTANT  |
| <b>Renal failure</b>           |                   |              |               |              |              |                      |                                |                  |                        |                                               |             |            |
| 1                              | randomised trials | not serious  | not serious   | not serious  | very serious | none                 | 18/308 (5.8%)                  | 12/153 (7.8%)    | OR 0.73 (0.34 to 1.56) | 20 fewer per 1 000 (from 50 fewer to 39 more) | ⊕⊕○○<br>LOW | IMPORTANT  |

**Patient or population: relapsed/refractory multiple myeloma with standard cytogenetic risk**  
**Intervention: daratumumab + backbone therapy**  
**Comparison: backbone therapy**

| Outcomes                                             | No of participants (studies) | Certainty of the evidence (GRADE) | Relative effect (95% CI)  | Anticipated absolute effects |                                                     |
|------------------------------------------------------|------------------------------|-----------------------------------|---------------------------|------------------------------|-----------------------------------------------------|
|                                                      |                              |                                   |                           | Risk with backbone therapy   | Risk difference with daratumumab + backbone therapy |
| minimal residual disease negativity (MRD negativity) | 631 (2 RCTs)                 | ⊕○○○<br>VERY LOW                  | OR 29.88 (4.04 to 220.78) | 3 per 1 000                  | 86 more per 1 000 (10 more to 417 more)             |
| stringent complete response (sCR)                    | 631 (2 RCTs)                 | ⊕○○○<br>VERY LOW                  | OR 3.12 (1.93 to 5.04)    | 85 per 1 000                 | 140 more per 1 000 (67 more to 234 more)            |
| complete response or better (CR or better)           | 631 (2 RCTs)                 | ⊕○○○<br>VERY LOW                  | OR 3.78 (2.63 to 5.43)    | 183 per 1 000                | 275 more per 1 000 (188 more to 366 more)           |
| death or disease progression                         | 1076 (5 RCTs)                | ⊕⊕○○<br>LOW                       | HR 0.38 (0.29 to 0.50)    | 722 per 1 000                | 337 fewer per 1 000 (412 fewer to 249 fewer)        |

\*The risk in the intervention group (and its 95% confidence interval) is based on the assumed risk in the comparison group and the relative effect of the intervention (and its 95% CI).

CI: Confidence interval; OR: Odds ratio; HR: Hazard Ratio

**GRADE Working Group grades of evidence**

**High certainty:** We are very confident that the true effect lies close to that of the estimate of the effect

**Moderate certainty:** We are moderately confident in the effect estimate: The true effect is likely to be close to the estimate of the effect, but there is a possibility that it is substantially different

**Low certainty:** Our confidence in the effect estimate is limited: The true effect may be substantially different from the estimate of the effect

**Very low certainty:** We have very little confidence in the effect estimate: The true effect is likely to be substantially different from the estimate of effect

**Patient or population: relapsed/refractory multiple myeloma with standard cytogenetic risk**  
**Intervention: daratumumab + backbone therapy**  
**Comparison: backbone therapy**

| Outcomes                   | № of participants (studies) | Certainty of the evidence (GRADE) | Relative effect (95% CI) | Anticipated absolute effects |                                                     |
|----------------------------|-----------------------------|-----------------------------------|--------------------------|------------------------------|-----------------------------------------------------|
|                            |                             |                                   |                          | Risk with backbone therapy   | Risk difference with daratumumab + backbone therapy |
| all grade thrombocytopenia | 641 (2 RCTs)                | ⊕⊕○○<br>LOW                       | OR 1.48 (1.07 to 2.04)   | 333 per 1 000                | 92 more per 1 000 (15 more to 172 more)             |
| grade 3-4 thrombocytopenia | 641 (2 RCTs)                | ⊕⊕○○<br>LOW                       | OR 1.32 (0.92 to 1.90)   | 221 per 1 000                | 51 more per 1 000 (14 fewer to 129 more)            |
| all grade lymphopenia      | 641 (2 RCTs)                | ⊕⊕○○<br>LOW                       | OR 1.06 (0.61 to 1.88)   | 80 per 1 000                 | 4 more per 1 000 (30 fewer to 61 more)              |
| grade 3-4 lymphopenia      | 641 (2 RCTs)                | ⊕⊕○○<br>LOW                       | OR 2.16 (1.01 to 4.65)   | 32 per 1 000                 | 35 more per 1 000 (0 fewer to 101 more)             |
| all grade neutropenia      | 641 (2 RCTs)                | ⊕⊕○○<br>LOW                       | OR 1.77 (1.28 to 2.45)   | 308 per 1 000                | 133 more per 1 000 (55 more to 214 more)            |
| grade 3-4 neutropenia      | 641 (2 RCTs)                | ⊕⊕○○<br>LOW                       | OR 1.91 (1.36 to 2.69)   | 240 per 1 000                | 136 more per 1 000 (61 more to 219 more)            |

\*The risk in the intervention group (and its 95% confidence interval) is based on the assumed risk in the comparison group and the relative effect of the intervention (and its 95% CI).

CI: Confidence interval; OR: Odds ratio; HR: Hazard Ratio

**GRADE Working Group grades of evidence**

**High certainty:** We are very confident that the true effect lies close to that of the estimate of the effect

**Moderate certainty:** We are moderately confident in the effect estimate: The true effect is likely to be close to the estimate of the effect, but there is a possibility that it is substantially different. **Low certainty:**

**Our confidence in the effect estimate is limited:** The true effect may be substantially different from the estimate of the effect. **Very low certainty:** We have very little confidence in the effect estimate: The true effect is likely to be substantially different from the estimate of effect

**Patient or population: relapsed/refractory multiple myeloma with standard cytogenetic risk**  
**Intervention: daratumumab + backbone therapy**  
**Comparison: backbone therapy**

| Outcomes                        | No of participants (studies) | Certainty of the evidence (GRADE) | Relative effect (95% CI) | Anticipated absolute effects |                                                     |
|---------------------------------|------------------------------|-----------------------------------|--------------------------|------------------------------|-----------------------------------------------------|
|                                 |                              |                                   |                          | Risk with backbone therapy   | Risk difference with daratumumab + backbone therapy |
| all grade anaemia               | 641 (2 RCTs)                 | ⊕⊕○○<br>LOW                       | OR 1.11 (0.80 to 1.53)   | 330 per 1 000                | 23 more per 1 000 (47 fewer to 100 more)            |
| grade 3-4 anaemia               | 641 (2 RCTs)                 | ⊕⊕○○<br>LOW                       | OR 0.96 (0.64 to 1.44)   | 176 per 1 000                | 6 fewer per 1 000 (56 fewer to 59 more)             |
| all grade peripheral neuropathy | 270 (1 RCT)                  | ⊕⊕○○<br>LOW                       | OR 1.72 (1.06 to 2.80)   | 368 per 1 000                | 132 more per 1 000 (14 more to 252 more)            |
| grade 3-4 peripheral neuropathy | 273 (1 RCT)                  | ⊕⊕○○<br>LOW                       | OR 0.48 (0.14 to 1.64)   | 59 per 1 000                 | 30 fewer per 1 000 (50 fewer to 34 more)            |
| all grade hypertension          | 641 (2 RCTs)                 | ⊕⊕○○<br>LOW                       | OR 3.22 (1.14 to 9.13)   | 42 per 1 000                 | 81 more per 1 000 (6 more to 242 more)              |
| grade 3-4 hypertension          | 641 (2 RCTs)                 | ⊕⊕○○<br>LOW                       | OR 4.58 (1.30 to 16.09)  | 10 per 1 000                 | 33 more per 1 000 (3 more to 125 more)              |

\*The risk in the intervention group (and its 95% confidence interval) is based on the assumed risk in the comparison group and the relative effect of the intervention (and its 95% CI).

CI: Confidence interval; OR: Odds ratio; HR: Hazard Ratio

**GRADE Working Group grades of evidence**

**High certainty:** We are very confident that the true effect lies close to that of the estimate of the effect

**Moderate certainty:** We are moderately confident in the effect estimate: The true effect is likely to be close to the estimate of the effect, but there is a possibility that it is substantially different. **Low certainty:**

**Our confidence in the effect estimate is limited: The true effect may be substantially different from the estimate of the effect. Very low certainty:** We have very little confidence in the effect estimate: The true effect is likely to be substantially different from the estimate of effect



**Patient or population: relapsed/refractory multiple myeloma with standard cytogenetic risk**

**Intervention: daratumumab + backbone therapy**

**Comparison: backbone therapy**

| Outcomes                               | No of participants (studies) | Certainty of the evidence (GRADE) | Relative effect (95% CI) | Anticipated absolute effects |                                                     |
|----------------------------------------|------------------------------|-----------------------------------|--------------------------|------------------------------|-----------------------------------------------------|
|                                        |                              |                                   |                          | Risk with backbone therapy   | Risk difference with daratumumab + backbone therapy |
| Second primary cancer                  |                              |                                   | Not reported.            |                              |                                                     |
| Acute cardiac failure - not reported   |                              |                                   | Not reported.            |                              |                                                     |
| Ischaemic heart disease - not reported |                              |                                   | Not reported.            |                              |                                                     |
| Renal failure - not reported           |                              |                                   | Not reported.            |                              |                                                     |

\*The risk in the intervention group (and its 95% confidence interval) is based on the assumed risk in the comparison group and the relative effect of the intervention (and its 95% CI).

CI: Confidence interval; HR: Hazard Ratio; OR: Odds ratio

GRADE Working Group grades of evidence

High certainty: We are very confident that the true effect lies close to that of the estimate of the effect

Moderate certainty: We are moderately confident in the effect estimate: The true effect is likely to be close to the estimate of the effect, but there is a possibility that it is substantially different

Low certainty: Our confidence in the effect estimate is limited: The true effect may be substantially different from the estimate of the effect

Very low certainty: We have very little confidence in the effect estimate: The true effect is likely to be substantially different from the estimate of effect

# Patient or population: relapsed/refractory multiple myeloma with standard cytogenetic risk

## Intervention: daratumumab + backbone therapy

## Comparison: backbone therapy

| Certainty assessment                |                   |              |               |              |              |                      | № of patients                  |                  | Effect                    |                                                   | Certainty        | Importance |
|-------------------------------------|-------------------|--------------|---------------|--------------|--------------|----------------------|--------------------------------|------------------|---------------------------|---------------------------------------------------|------------------|------------|
| № of studies                        | Study design      | Risk of bias | Inconsistency | Indirectness | Imprecision  | Other considerations | daratumumab + backbone therapy | backbone therapy | Relative (95% CI)         | Absolute (95% CI)                                 |                  |            |
| minimal residual disease negativity |                   |              |               |              |              |                      |                                |                  |                           |                                                   |                  |            |
| 2                                   | randomised trials | not serious  | not serious   | serious      | very serious | none                 | 29/325 (8.9%)                  | 1/306 (0.3%)     | OR 29.88 (4.04 to 220.78) | 86 more per 1 000 (from 10 more to 417 more)      | ⊕○○○<br>VERY LOW | IMPORTANT  |
| stringent complete response         |                   |              |               |              |              |                      |                                |                  |                           |                                                   |                  |            |
| 2                                   | randomised trials | not serious  | not serious   | serious      | very serious | none                 | 73/325 (22.5%)                 | 26/306 (8.5%)    | OR 3.12 (1.93 to 5.04)    | 140 more per 1 000 (from 67 more to 234 more)     | ⊕○○○<br>VERY LOW | IMPORTANT  |
| complete response or better         |                   |              |               |              |              |                      |                                |                  |                           |                                                   |                  |            |
| 2                                   | randomised trials | not serious  | not serious   | serious      | very serious | none                 | 149/325 (45.8%)                | 56/306 (18.3%)   | OR 3.78 (2.63 to 5.43)    | 275 more per 1 000 (from 188 more to 366 more)    | ⊕○○○<br>VERY LOW | IMPORTANT  |
| death or disease progression        |                   |              |               |              |              |                      |                                |                  |                           |                                                   |                  |            |
| 5                                   | randomised trials | not serious  | serious       | serious      | not serious  | none                 | 239/594 (40.2%)                | 348/482 (72.2%)  | HR 0.38 (0.29 to 0.50)    | 337 fewer per 1 000 (from 412 fewer to 249 fewer) | ⊕⊕○○<br>LOW      | CRITICAL   |
| all grade thrombocytopenia          |                   |              |               |              |              |                      |                                |                  |                           |                                                   |                  |            |
| 2                                   | randomised trials | not serious  | not serious   | serious      | serious      | none                 | 140/329 (42.6%)                | 104/312 (33.3%)  | OR 1.48 (1.07 to 2.04)    | 92 more per 1 000 (from 15 more to 172 more)      | ⊕⊕○○<br>LOW      | IMPORTANT  |
| grade 3-4 thrombocytopenia          |                   |              |               |              |              |                      |                                |                  |                           |                                                   |                  |            |
| 2                                   | randomised trials | not serious  | not serious   | serious      | serious      | none                 | 90/329 (27.4%)                 | 69/312 (22.1%)   | OR 1.32 (0.92 to 1.90)    | 51 more per 1 000 (from 14 fewer to 129 more)     | ⊕⊕○○<br>LOW      | IMPORTANT  |

# Patient or population: relapsed/refractory multiple myeloma with standard cytogenetic risk

## Intervention: daratumumab + backbone therapy

## Comparison: backbone therapy

| Certainty assessment      |                   |              |               |              |             |                      | N <sup>o</sup> of patients     |                  | Effect                 |                                               | Certainty   | Importance |
|---------------------------|-------------------|--------------|---------------|--------------|-------------|----------------------|--------------------------------|------------------|------------------------|-----------------------------------------------|-------------|------------|
| N <sup>o</sup> of studies | Study design      | Risk of bias | Inconsistency | Indirectness | Imprecision | Other considerations | daratumumab + backbone therapy | backbone therapy | Relative (95% CI)      | Absolute (95% CI)                             |             |            |
| all grade lymphopenia     |                   |              |               |              |             |                      |                                |                  |                        |                                               |             |            |
| 2                         | randomised trials | not serious  | not serious   | serious      | serious     | none                 | 28/329 (8.5%)                  | 25/312 (8.0%)    | OR 1.06 (0.61 to 1.88) | 4 more per 1 000 (from 30 fewer to 61 more)   | ⊕⊕○○<br>LOW | IMPORTANT  |
| grade 3-4 lymphopenia     |                   |              |               |              |             |                      |                                |                  |                        |                                               |             |            |
| 2                         | randomised trials | not serious  | not serious   | serious      | serious     | none                 | 22/329 (6.7%)                  | 10/312 (3.2%)    | OR 2.16 (1.01 to 4.65) | 35 more per 1 000 (from 0 fewer to 101 more)  | ⊕⊕○○<br>LOW | IMPORTANT  |
| all grade neutropenia     |                   |              |               |              |             |                      |                                |                  |                        |                                               |             |            |
| 2                         | randomised trials | not serious  | not serious   | serious      | serious     | none                 | 145/329 (44.1%)                | 96/312 (30.8%)   | OR 1.77 (1.28 to 2.45) | 133 more per 1 000 (from 55 more to 214 more) | ⊕⊕○○<br>LOW | IMPORTANT  |
| grade 3-4 neutropenia     |                   |              |               |              |             |                      |                                |                  |                        |                                               |             |            |
| 2                         | randomised trials | not serious  | not serious   | serious      | serious     | none                 | 124/329 (37.7%)                | 75/312 (24.0%)   | OR 1.91 (1.36 to 2.69) | 136 more per 1 000 (from 61 more to 219 more) | ⊕⊕○○<br>LOW | IMPORTANT  |
| all grade anaemia         |                   |              |               |              |             |                      |                                |                  |                        |                                               |             |            |
| 2                         | randomised trials | not serious  | not serious   | serious      | serious     | none                 | 116/329 (35.3%)                | 103/312 (33.0%)  | OR 1.11 (0.80 to 1.53) | 23 more per 1 000 (from 47 fewer to 100 more) | ⊕⊕○○<br>LOW | IMPORTANT  |
| grade 3-4 anaemia         |                   |              |               |              |             |                      |                                |                  |                        |                                               |             |            |
| 2                         | randomised trials | not serious  | not serious   | serious      | serious     | none                 | 56/329 (17.0%)                 | 55/312 (17.6%)   | OR 0.96 (0.64 to 1.44) | 6 fewer per 1 000 (from 56 fewer to 59 more)  | ⊕⊕○○<br>LOW | IMPORTANT  |

# Patient or population: relapsed/refractory multiple myeloma with standard cytogenetic risk

## Intervention: daratumumab + backbone therapy

## Comparison: backbone therapy

| Certainty assessment                   |                   |              |               |              |              |                      | № of patients                  |                  | Effect                  |                                               | Certainty   | Importance |
|----------------------------------------|-------------------|--------------|---------------|--------------|--------------|----------------------|--------------------------------|------------------|-------------------------|-----------------------------------------------|-------------|------------|
| № of studies                           | Study design      | Risk of bias | Inconsistency | Indirectness | Imprecision  | Other considerations | daratumumab + backbone therapy | backbone therapy | Relative (95% CI)       | Absolute (95% CI)                             |             |            |
| <b>all grade peripheral neuropathy</b> |                   |              |               |              |              |                      |                                |                  |                         |                                               |             |            |
| 1                                      | randomised trials | not serious  | not serious   | not serious  | very serious | none                 | 67/134 (50.0%)                 | 50/136 (36.8%)   | OR 1.72 (1.06 to 2.80)  | 132 more per 1 000 (from 14 more to 252 more) | ⊕⊕○○<br>LOW | IMPORTANT  |
| <b>grade 3-4 peripheral neuropathy</b> |                   |              |               |              |              |                      |                                |                  |                         |                                               |             |            |
| 1                                      | randomised trials | not serious  | not serious   | not serious  | very serious | none                 | 4/137 (2.9%)                   | 8/136 (5.9%)     | OR 0.48 (0.14 to 1.64)  | 30 fewer per 1 000 (from 50 fewer to 34 more) | ⊕⊕○○<br>LOW | IMPORTANT  |
| <b>all grade hypertension</b>          |                   |              |               |              |              |                      |                                |                  |                         |                                               |             |            |
| 2                                      | randomised trials | not serious  | not serious   | not serious  | very serious | none                 | 27/329 (8.2%)                  | 13/312 (4.2%)    | OR 3.22 (1.14 to 9.13)  | 81 more per 1 000 (from 6 more to 242 more)   | ⊕⊕○○<br>LOW | IMPORTANT  |
| <b>grade 3-4 hypertension</b>          |                   |              |               |              |              |                      |                                |                  |                         |                                               |             |            |
| 2                                      | randomised trials | not serious  | not serious   | not serious  | very serious | none                 | 14/329 (4.3%)                  | 3/312 (1.0%)     | OR 4.58 (1.30 to 16.09) | 33 more per 1 000 (from 3 more to 125 more)   | ⊕⊕○○<br>LOW | IMPORTANT  |

Second primary cancer, acute cardiac failure, ischaemic heart failure, and renal failure were not reported.

# Patient or population: relapsed/refractory multiple myeloma with high cytogenetic risk

## Intervention: daratumumab + backbone therapy

## Comparison: backbone therapy

| Outcomes                                             | № of participants (studies) | Certainty of the evidence (GRADE) | Relative effect (95% CI)  | Anticipated absolute effects |                                                     |
|------------------------------------------------------|-----------------------------|-----------------------------------|---------------------------|------------------------------|-----------------------------------------------------|
|                                                      |                             |                                   |                           | Risk with backbone therapy   | Risk difference with daratumumab + backbone therapy |
| minimal residual disease negativity (MRD negativity) | 142 (2 RCTs)                | ⊕○○○<br>VERY LOW                  | OR 18.48 (2.38 to 143.67) | 0 per 1 000                  | 0 fewer per 1 000 (0 fewer to 0 fewer)              |
| stringent complete response (sCR)                    | 142 (2 RCTs)                | ⊕○○○<br>VERY LOW                  | OR 8.74 (0.45 to 168.00)  | 15 per 1 000                 | 101 more per 1 000 (8 fewer to 700 more)            |
| complete response or better (CR or better)           | 73 (1 RCT)                  | ⊕⊕○○<br>LOW                       | OR 6.29 (1.28 to 30.82)   | 59 per 1 000                 | 223 more per 1 000 (15 more to 599 more)            |
| death or disease progression                         | 366 (5 RCTs)                | ⊕⊕⊕○<br>MODERATE                  | HR 0.52 (0.35 to 0.76)    | 734 per 1 000                | 236 fewer per 1 000 (363 fewer to 100 fewer)        |

\*The risk in the intervention group (and its 95% confidence interval) is based on the assumed risk in the comparison group and the relative effect of the intervention (and its 95% CI).

CI: Confidence interval; OR: Odds ratio; HR: Hazard Ratio

### GRADE Working Group grades of evidence

**High certainty:** We are very confident that the true effect lies close to that of the estimate of the effect

**Moderate certainty:** We are moderately confident in the effect estimate: The true effect is likely to be close to the estimate of the effect, but there is a possibility that it is substantially different. **Low**

**certainty:** Our confidence in the effect estimate is limited: The true effect may be substantially different from the estimate of the effect. **Very low certainty:** We have very little confidence in the effect estimate:

The true effect is likely to be substantially different from the estimate of effect

**Patient or population: relapsed/refractory multiple myeloma with high cytogenetic risk**  
**Intervention: daratumumab + backbone therapy**  
**Comparison: backbone therapy**

| Outcomes                   | № of participants (studies) | Certainty of the evidence (GRADE) | Relative effect (95% CI) | Anticipated absolute effects |                                                     |
|----------------------------|-----------------------------|-----------------------------------|--------------------------|------------------------------|-----------------------------------------------------|
|                            |                             |                                   |                          | Risk with backbone therapy   | Risk difference with daratumumab + backbone therapy |
| all grade thrombocytopenia | 143 (2 RCTs)                | ⊕⊕○○<br>LOW                       | OR 1.23 (0.64 to 2.38)   | 441 per 1 000                | 51 more per 1 000 (106 fewer to 211 more)           |
| grade 3-4 thrombocytopenia | 143 (2 RCTs)                | ⊕⊕○○<br>LOW                       | OR 1.18 (0.59 to 2.35)   | 324 per 1 000                | 37 more per 1 000 (103 fewer to 206 more)           |
| all grade lymphopenia      | 143 (2 RCTs)                | ⊕⊕○○<br>LOW                       | OR 1.18 (0.42 to 3.39)   | 103 per 1 000                | 16 more per 1 000 (57 fewer to 177 more)            |
| grade 3-4 lymphopenia      | 143 (2 RCTs)                | ⊕⊕○○<br>LOW                       | OR 1.23 (0.41 to 3.78)   | 88 per 1 000                 | 18 more per 1 000 (50 fewer to 180 more)            |
| all grade neutropenia      | 143 (2 RCTs)                | ⊕⊕○○<br>LOW                       | OR 1.58 (0.79 to 3.14)   | 309 per 1 000                | 105 more per 1 000 (48 fewer to 275 more)           |
| grade 3-4 neutropenia      | 143 (2 RCTs)                | ⊕⊕○○<br>LOW                       | OR 1.23 (0.59 to 2.55)   | 265 per 1 000                | 42 more per 1 000 (90 fewer to 214 more)            |

\*The risk in the intervention group (and its 95% confidence interval) is based on the assumed risk in the comparison group and the relative effect of the intervention (and its 95% CI).

CI: Confidence interval; OR: Odds ratio; HR: Hazard Ratio

**GRADE Working Group grades of evidence**

**High certainty:** We are very confident that the true effect lies close to that of the estimate of the effect

**Moderate certainty:** We are moderately confident in the effect estimate: The true effect is likely to be close to the estimate of the effect, but there is a possibility that it is substantially different. **Low certainty:** Our confidence in the effect estimate is limited: The true effect may be substantially different from the estimate of the effect. **Very low certainty:** We have very little confidence in the effect estimate: The true effect is likely to be substantially different from the estimate of effect

**Patient or population: relapsed/refractory multiple myeloma with high cytogenetic risk**  
**Intervention: daratumumab + backbone therapy**  
**Comparison: backbone therapy**

| Outcomes                        | № of participants (studies) | Certainty of the evidence (GRADE) | Relative effect (95% CI)  | Anticipated absolute effects |                                                     |
|---------------------------------|-----------------------------|-----------------------------------|---------------------------|------------------------------|-----------------------------------------------------|
|                                 |                             |                                   |                           | Risk with backbone therapy   | Risk difference with daratumumab + backbone therapy |
| all grade anaemia               | 143 (2 RCTs)                | ⊕⊕○○<br>LOW                       | OR 0.49 (0.24 to 0.99)    | 426 per 1 000                | 159 fewer per 1 000 (275 fewer to 2 fewer)          |
| grade 3-4 anaemia               | 143 (2 RCTs)                | ⊕⊕○○<br>LOW                       | OR 0.56 (0.24 to 1.31)    | 235 per 1 000                | 88 fewer per 1 000 (167 fewer to 52 more)           |
| all grade peripheral neuropathy | 74 (1 RCT)                  | ⊕⊕○○<br>LOW                       | OR 1.97 (0.78 to 5.01)    | 382 per 1 000                | 167 more per 1 000 (57 fewer to 374 more)           |
| grade 3-4 peripheral neuropathy | 74 (1 RCT)                  | ⊕⊕○○<br>LOW                       | OR 0.39 (0.07 to 2.30)    | 118 per 1 000                | 68 fewer per 1 000 (108 fewer to 117 more)          |
| all grade hypertension          | 143 (2 RCTs)                | ⊕○○○<br>VERY LOW                  | OR 4.54 (1.23 to 16.71)   | 44 per 1 000                 | 129 more per 1 000 (10 more to 391 more)            |
| grade 3-4 hypertension          | 143 (2 RCTs)                | ⊕⊕○○<br>LOW                       | OR 12.81 (0.71 to 231.89) | 0 per 1 000                  | 0 fewer per 1 000 (0 fewer to 0 fewer)              |

\*The risk in the intervention group (and its 95% confidence interval) is based on the assumed risk in the comparison group and the relative effect of the intervention (and its 95% CI).

CI: Confidence interval; OR: Odds ratio; HR: Hazard Ratio

**GRADE Working Group grades of evidence**

**High certainty:** We are very confident that the true effect lies close to that of the estimate of the effect  
**Moderate certainty:** We are moderately confident in the effect estimate: The true effect is likely to be close to the estimate of the effect, but there is a possibility that it is substantially different. **Low certainty:** Our confidence in the effect estimate is limited: The true effect may be substantially different from the estimate of the effect. **Very low certainty:** We have very little confidence in the effect estimate: The true effect is likely to be substantially different from the estimate of effect

**Patient or population: relapsed/refractory multiple myeloma with high cytogenetic risk**

**Intervention: daratumumab + backbone therapy**

**Comparison: backbone therapy**

| Outcomes                               | No of participants (studies) | Certainty of the evidence (GRADE) | Relative effect (95% CI) | Anticipated absolute effects |                                                     |
|----------------------------------------|------------------------------|-----------------------------------|--------------------------|------------------------------|-----------------------------------------------------|
|                                        |                              |                                   |                          | Risk with backbone therapy   | Risk difference with daratumumab + backbone therapy |
| Second primary cancer                  |                              |                                   | Not reported.            |                              |                                                     |
| Acute cardiac failure - not reported   |                              |                                   | Not reported.            |                              |                                                     |
| Ischaemic heart disease - not reported |                              |                                   | Not reported.            |                              |                                                     |
| Renal failure - not reported           |                              |                                   | Not reported.            |                              |                                                     |

\*The risk in the intervention group (and its 95% confidence interval) is based on the assumed risk in the comparison group and the relative effect of the intervention (and its 95% CI).

CI: Confidence interval; HR: Hazard Ratio; OR: Odds ratio

GRADE Working Group grades of evidence

High certainty: We are very confident that the true effect lies close to that of the estimate of the effect

Moderate certainty: We are moderately confident in the effect estimate: The true effect is likely to be close to the estimate of the effect, but there is a possibility that it is substantially different

Low certainty: Our confidence in the effect estimate is limited: The true effect may be substantially different from the estimate of the effect

Very low certainty: We have very little confidence in the effect estimate: The true effect is likely to be substantially different from the estimate of effect



# Patient or population: relapsed/refractory multiple myeloma with high cytogenetic risk

## Intervention: daratumumab + backbone therapy

## Comparison: backbone therapy

| Certainty assessment                |                   |              |               |              |              |                      | N° of patients                 |                  | Effect                    |                                                   | Certainty        | Importance |
|-------------------------------------|-------------------|--------------|---------------|--------------|--------------|----------------------|--------------------------------|------------------|---------------------------|---------------------------------------------------|------------------|------------|
| N° of studies                       | Study design      | Risk of bias | Inconsistency | Indirectness | Imprecision  | Other considerations | daratumumab + backbone therapy | backbone therapy | Relative (95% CI)         | Absolute (95% CI)                                 |                  |            |
| minimal residual disease negativity |                   |              |               |              |              |                      |                                |                  |                           |                                                   |                  |            |
| 2                                   | randomised trials | not serious  | not serious   | serious      | very serious | none                 | 4/74 (5.4%)                    | 0/68 (0.0%)      | OR 18.48 (2.38 to 143.67) | 0 fewer per 1 000 (from 0 fewer to 0 fewer)       | ⊕○○○<br>VERY LOW | IMPORTANT  |
| stringent complete response         |                   |              |               |              |              |                      |                                |                  |                           |                                                   |                  |            |
| 2                                   | randomised trials | not serious  | not serious   | serious      | very serious | none                 | 14/74 (18.9%)                  | 1/68 (1.5%)      | OR 8.74 (0.45 to 168.00)  | 101 more per 1 000 (from 8 fewer to 700 more)     | ⊕○○○<br>VERY LOW | IMPORTANT  |
| complete response or better         |                   |              |               |              |              |                      |                                |                  |                           |                                                   |                  |            |
| 1                                   | randomised trials | not serious  | not serious   | not serious  | very serious | none                 | 11/39 (28.2%)                  | 2/34 (5.9%)      | OR 6.29 (1.28 to 30.82)   | 223 more per 1 000 (from 15 more to 599 more)     | ⊕⊕○○<br>LOW      | IMPORTANT  |
| death or disease progression        |                   |              |               |              |              |                      |                                |                  |                           |                                                   |                  |            |
| 5                                   | randomised trials | not serious  | not serious   | serious      | not serious  | none                 | 103/208 (49.5%)                | 116/158 (73.4%)  | HR 0.52 (0.35 to 0.76)    | 236 fewer per 1 000 (from 363 fewer to 100 fewer) | ⊕⊕⊕○<br>MODERATE | CRITICAL   |
| all grade thrombocytopenia          |                   |              |               |              |              |                      |                                |                  |                           |                                                   |                  |            |
| 2                                   | randomised trials | not serious  | not serious   | serious      | serious      | none                 | 37/75 (49.3%)                  | 30/68 (44.1%)    | OR 1.23 (0.64 to 2.38)    | 51 more per 1 000 (from 106 fewer to 211 more)    | ⊕⊕○○<br>LOW      | IMPORTANT  |
| grade 3-4 thrombocytopenia          |                   |              |               |              |              |                      |                                |                  |                           |                                                   |                  |            |
| 2                                   | randomised trials | not serious  | not serious   | serious      | serious      | none                 | 27/75 (36.0%)                  | 22/68 (32.4%)    | OR 1.18 (0.59 to 2.35)    | 37 more per 1 000 (from 103 fewer to 206 more)    | ⊕⊕○○<br>LOW      | IMPORTANT  |

# Patient or population: relapsed/refractory multiple myeloma with high cytogenetic risk

## Intervention: daratumumab + backbone therapy

## Comparison: backbone therapy

| Certainty assessment  |                   |              |               |              |             |                      | N° of patients                 |                  | Effect                 |                                                 | Certainty   | Importance |
|-----------------------|-------------------|--------------|---------------|--------------|-------------|----------------------|--------------------------------|------------------|------------------------|-------------------------------------------------|-------------|------------|
| N° of studies         | Study design      | Risk of bias | Inconsistency | Indirectness | Imprecision | Other considerations | daratumumab + backbone therapy | backbone therapy | Relative (95% CI)      | Absolute (95% CI)                               |             |            |
| all grade lymphopenia |                   |              |               |              |             |                      |                                |                  |                        |                                                 |             |            |
| 2                     | randomised trials | not serious  | not serious   | serious      | serious     | none                 | 9/75 (12.0%)                   | 7/68 (10.3%)     | OR 1.18 (0.42 to 3.39) | 16 more per 1 000 (from 57 fewer to 177 more)   | ⊕⊕○○<br>LOW | IMPORTANT  |
| grade 3-4 lymphopenia |                   |              |               |              |             |                      |                                |                  |                        |                                                 |             |            |
| 2                     | randomised trials | not serious  | not serious   | serious      | serious     | none                 | 8/75 (10.7%)                   | 6/68 (8.8%)      | OR 1.23 (0.41 to 3.78) | 18 more per 1 000 (from 50 fewer to 180 more)   | ⊕⊕○○<br>LOW | IMPORTANT  |
| all grade neutropenia |                   |              |               |              |             |                      |                                |                  |                        |                                                 |             |            |
| 2                     | randomised trials | not serious  | not serious   | serious      | serious     | none                 | 31/75 (41.3%)                  | 21/68 (30.9%)    | OR 1.58 (0.79 to 3.14) | 105 more per 1 000 (from 48 fewer to 275 more)  | ⊕⊕○○<br>LOW | IMPORTANT  |
| grade 3-4 neutropenia |                   |              |               |              |             |                      |                                |                  |                        |                                                 |             |            |
| 2                     | randomised trials | not serious  | not serious   | serious      | serious     | none                 | 23/75 (30.7%)                  | 18/68 (26.5%)    | OR 1.23 (0.59 to 2.55) | 42 more per 1 000 (from 90 fewer to 214 more)   | ⊕⊕○○<br>LOW | IMPORTANT  |
| all grade anaemia     |                   |              |               |              |             |                      |                                |                  |                        |                                                 |             |            |
| 2                     | randomised trials | not serious  | not serious   | serious      | serious     | none                 | 20/75 (26.7%)                  | 29/68 (42.6%)    | OR 0.49 (0.24 to 0.99) | 159 fewer per 1 000 (from 275 fewer to 2 fewer) | ⊕⊕○○<br>LOW | IMPORTANT  |
| grade 3-4 anaemia     |                   |              |               |              |             |                      |                                |                  |                        |                                                 |             |            |
| 2                     | randomised trials | not serious  | not serious   | serious      | serious     | none                 | 11/75 (14.7%)                  | 16/68 (23.5%)    | OR 0.56 (0.24 to 1.31) | 88 fewer per 1 000 (from 167 fewer to 52 more)  | ⊕⊕○○<br>LOW | IMPORTANT  |

# Patient or population: relapsed/refractory multiple myeloma with high cytogenetic risk

## Intervention: daratumumab + backbone therapy

## Comparison: backbone therapy

| Certainty assessment                   |                   |              |               |              |              |                      | № of patients                  |                  | Effect                    |                                                 | Certainty        | Importance |
|----------------------------------------|-------------------|--------------|---------------|--------------|--------------|----------------------|--------------------------------|------------------|---------------------------|-------------------------------------------------|------------------|------------|
| № of studies                           | Study design      | Risk of bias | Inconsistency | Indirectness | Imprecision  | Other considerations | daratumumab + backbone therapy | backbone therapy | Relative (95% CI)         | Absolute (95% CI)                               |                  |            |
| <b>all grade peripheral neuropathy</b> |                   |              |               |              |              |                      |                                |                  |                           |                                                 |                  |            |
| 1                                      | randomised trials | not serious  | not serious   | not serious  | very serious | none                 | 22/40 (55.0%)                  | 13/34 (38.2%)    | OR 1.97 (0.78 to 5.01)    | 167 more per 1 000 (from 57 fewer to 374 more)  | ⊕⊕○○<br>LOW      | IMPORTANT  |
| <b>grade 3-4 peripheral neuropathy</b> |                   |              |               |              |              |                      |                                |                  |                           |                                                 |                  |            |
| 1                                      | randomised trials | not serious  | not serious   | not serious  | very serious | none                 | 2/40 (5.0%)                    | 4/34 (11.8%)     | OR 0.39 (0.07 to 2.30)    | 68 fewer per 1 000 (from 108 fewer to 117 more) | ⊕⊕○○<br>LOW      | IMPORTANT  |
| <b>all grade hypertension</b>          |                   |              |               |              |              |                      |                                |                  |                           |                                                 |                  |            |
| 2                                      | randomised trials | not serious  | not serious   | serious      | very serious | none                 | 13/75 (17.3%)                  | 3/68 (4.4%)      | OR 4.54 (1.23 to 16.71)   | 129 more per 1 000 (from 10 more to 391 more)   | ⊕○○○<br>VERY LOW | IMPORTANT  |
| <b>grade 3-4 hypertension</b>          |                   |              |               |              |              |                      |                                |                  |                           |                                                 |                  |            |
| 2                                      | randomised trials | not serious  | not serious   | serious      | serious      | none                 | 6/75 (8.0%)                    | 0/68 (0.0%)      | OR 12.81 (0.71 to 231.89) | 0 fewer per 1 000 (from 0 fewer to 0 fewer)     | ⊕⊕○○<br>LOW      | IMPORTANT  |

Second primary cancer, acute cardiac failure, ischaemic heart failure, and renal failure were not reported.
