# Supplementary material for: Addition of daratumumab to multiple myeloma backbone regimens significantly improves clinical outcomes: a systematic review and meta-analysis of randomised controlled trials
Source: PubMed Central journal article supplement (PMC8578422; doi:10.1038/s41598-021-01440-x), 2021-11-09
Supplement: 41598_2021_1440_MOESM3_ESM.pdf [file 41598_2021_1440_MOESM3_ESM.pdf]

**Supplementary Table:** Detailed search strategy

| <b>MEDLINE (via PubMed)</b>                                     |                                                                                                                                                                                                                                                                                                                                                                                                                                                        |
|-----------------------------------------------------------------|--------------------------------------------------------------------------------------------------------------------------------------------------------------------------------------------------------------------------------------------------------------------------------------------------------------------------------------------------------------------------------------------------------------------------------------------------------|
| Date of search                                                  | 2021.08.03.                                                                                                                                                                                                                                                                                                                                                                                                                                            |
| Field of search                                                 | All Fields                                                                                                                                                                                                                                                                                                                                                                                                                                             |
| Filters and restrictions                                        | no                                                                                                                                                                                                                                                                                                                                                                                                                                                     |
| Search key                                                      | (daratumumab) OR (humax-CD38) OR (humax-CD 38) OR (Darzalex) OR (anti-CD38) OR (antiCD38) OR (L01XC24) OR (945721-28-8) OR (DB09331) OR (4Z63YK6E0E) OR (D10777)                                                                                                                                                                                                                                                                                       |
| Translation                                                     | "daratumumab"[Supplementary Concept] OR "daratumumab"[All Fields] OR "daratumumab"[Supplementary Concept] OR "daratumumab"[All Fields] OR "humax cd38"[All Fields] OR "daratumumab"[Supplementary Concept] OR "daratumumab"[All Fields] OR "daratumumab"[Supplementary Concept] OR "daratumumab"[All Fields] OR "darzalex"[All Fields] OR "anti-CD38"[All Fields] OR "antiCD38"[All Fields] OR "945721-28-8"[All Fields] OR "4z63yk6e0e"[EC/RN Number] |
| Number of records                                               | 1,266                                                                                                                                                                                                                                                                                                                                                                                                                                                  |
| <b>Embase</b>                                                   |                                                                                                                                                                                                                                                                                                                                                                                                                                                        |
| Date of search                                                  | 2021.08.03.                                                                                                                                                                                                                                                                                                                                                                                                                                            |
| Field of search                                                 | All fields                                                                                                                                                                                                                                                                                                                                                                                                                                             |
| Filters and restrictions                                        | no                                                                                                                                                                                                                                                                                                                                                                                                                                                     |
| Search key                                                      | (daratumumab) OR (humax-CD38) OR (humax-CD 38) OR (Darzalex) OR (anti-CD38) OR (antiCD38) OR (L01XC24) OR (945721-28-8) OR (DB09331) OR (4Z63YK6E0E) OR (D10777)                                                                                                                                                                                                                                                                                       |
| Translation                                                     | daratumumab OR 'humax cd38' OR ('humax cd' AND 38) OR darzalex OR 'anti cd38' OR anticd38 OR l01xc24 OR '945721 28 8' OR db09331 OR 4z63yk6e0e OR d10777                                                                                                                                                                                                                                                                                               |
| Number of records                                               | 4,330                                                                                                                                                                                                                                                                                                                                                                                                                                                  |
| <b>Cochrane Central Register of Controlled Trials (CENTRAL)</b> |                                                                                                                                                                                                                                                                                                                                                                                                                                                        |
| Date of search                                                  | 2021.08.03.                                                                                                                                                                                                                                                                                                                                                                                                                                            |
| Field of search                                                 | All text                                                                                                                                                                                                                                                                                                                                                                                                                                               |
| Filters and restrictions                                        | no                                                                                                                                                                                                                                                                                                                                                                                                                                                     |
| Search key                                                      | (daratumumab) OR (humax-CD38) OR (humax-CD 38) OR (Darzalex) OR (anti-CD38) OR (antiCD38) OR (L01XC24) OR (945721-28-8) OR (DB09331) OR (4Z63YK6E0E) OR (D10777)                                                                                                                                                                                                                                                                                       |
| Translation                                                     | (daratumumab) OR (humax-CD38) OR (humax-CD 38) OR (Darzalex) OR (anti-CD38) OR (antiCD38) OR (L01XC24) OR (945721-28-8) OR (DB09331) OR (4Z63YK6E0E) OR (D10777) in All Text - (Word variations have been searched)                                                                                                                                                                                                                                    |
| Number of records                                               | 441                                                                                                                                                                                                                                                                                                                                                                                                                                                    |

**Supplementary Table:** Detailed search strategy (continued)

| <b>Scopus</b>            |                                                                                                                                                                                                |
|--------------------------|------------------------------------------------------------------------------------------------------------------------------------------------------------------------------------------------|
| Date of search           | 2021.08.03.                                                                                                                                                                                    |
| Field of search          | All Fields                                                                                                                                                                                     |
| Filters and restrictions | no                                                                                                                                                                                             |
| Search key               | (daratumumab) OR (humax-CD38) OR (humax-CD 38) OR (Darzalex) OR (anti-CD38) OR (antiCD38) OR (L01XC24) OR (945721-28-8) OR (DB09331) OR (4Z63YK6E0E) OR (D10777)                               |
| Translation              | ALL ( ( daratumumab ) OR ( humax-cd38 ) OR ( humax-cd 38 ) OR ( darzalex ) OR ( anti-cd38 ) OR ( anticd38 ) OR ( l01xc24 ) OR ( 945721-28-8 ) OR ( db09331 ) OR ( 4z63yk6e0e ) OR ( d10777 ) ) |
| Number of records        | 5,209                                                                                                                                                                                          |
| <b>Web of Science</b>    |                                                                                                                                                                                                |
| Date of search           | 2021.08.03.                                                                                                                                                                                    |
| Field of search          | All fields                                                                                                                                                                                     |
| Filters and restrictions | No                                                                                                                                                                                             |
| Search key               | (daratumumab) OR (humax-CD38) OR (humax-CD 38) OR (Darzalex) OR (anti-CD38) OR (antiCD38) OR (L01XC24) OR (945721-28-8) OR (DB09331) OR (4Z63YK6E0E) OR (D10777)                               |
| Translation              | ALL=((daratumumab) OR (humax-CD38) OR (humax-CD 38) OR (Darzalex) OR (anti-CD38) OR (antiCD38) OR (L01XC24) OR (945721-28-8) OR (DB09331) OR (4Z63YK6E0E) OR (D10777))                         |
| Number of records        | 2,275                                                                                                                                                                                          |
